# Supplementary material for: In situ generation of radical initiators using amine-borane complexes for carbohalogenation of alkenes
Source: Royal Society of Chemistry journal article supplement (doi:10.1039/d1cc06390a), 2022-01-01
Supplement: d1cc06390a2.pdf [file d1cc06390a2.pdf]

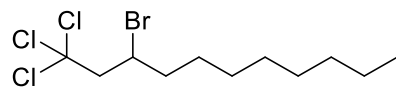

Chemical Formula:  $C_{11}H_{20}BrCl_3$

Molecular Weight: 338,54

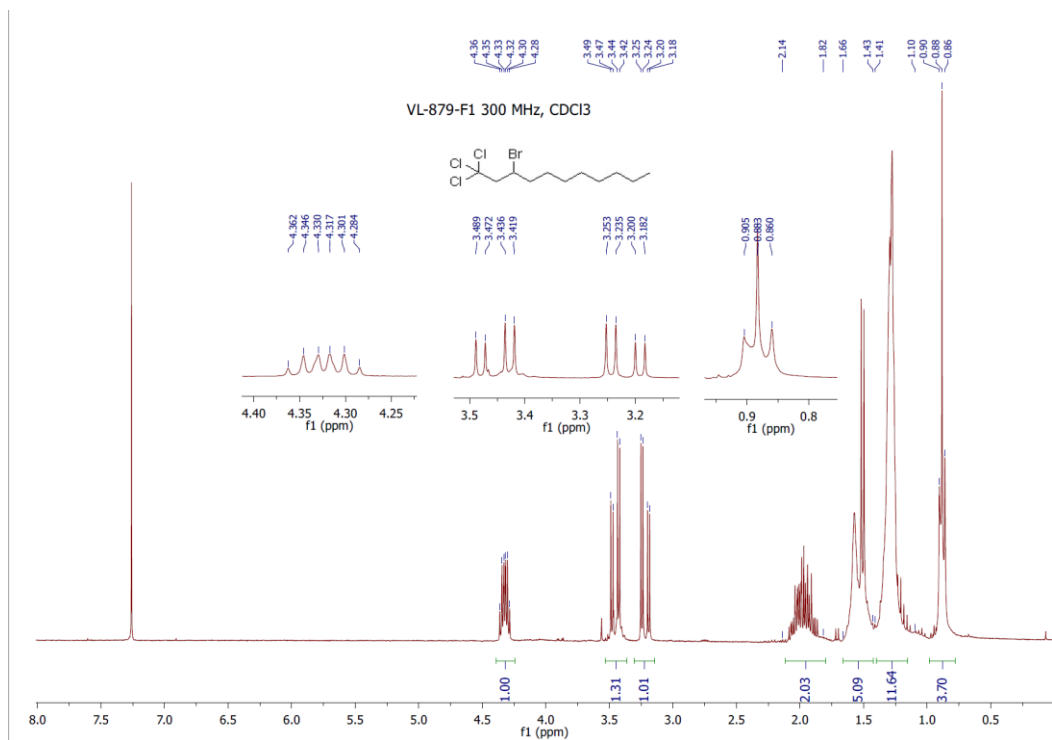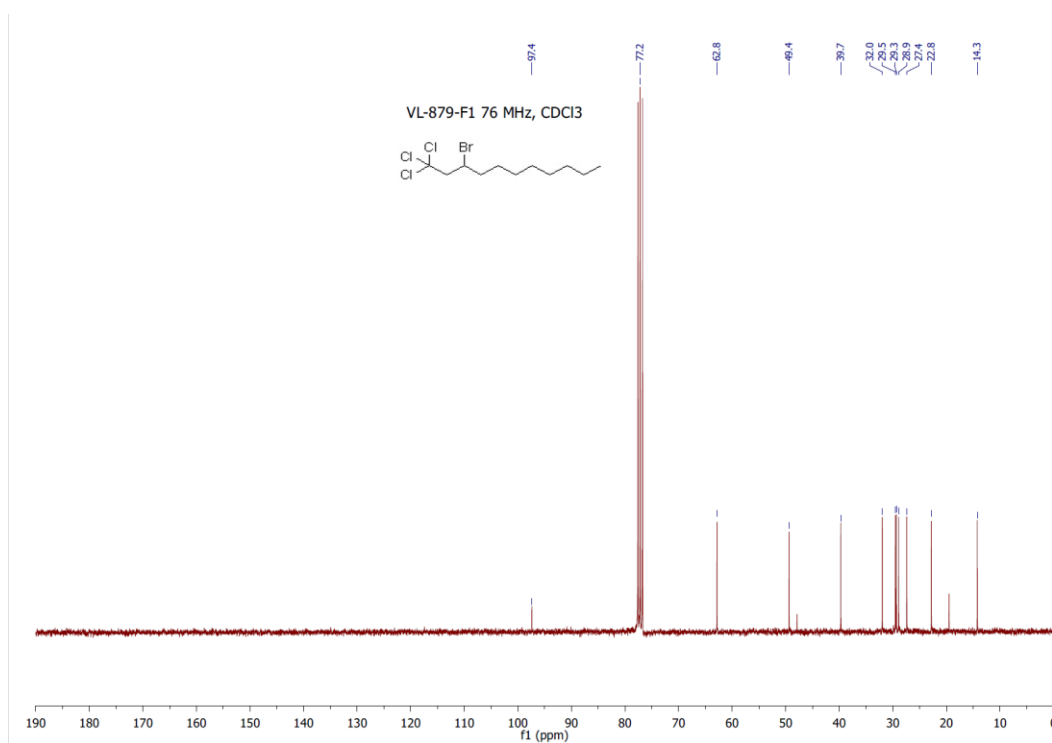

File : D:\DataMS\2017\08-2017\25082017\VL879F1.D  
 Operator : VL  
 Acquired : 25 Aug 2017 14:36 using AcqMethod NORMAL.M  
 Instrument : 7890 5975  
 Sample Name : VL879F1  
 Misc Info :  
 Vial Number: 12

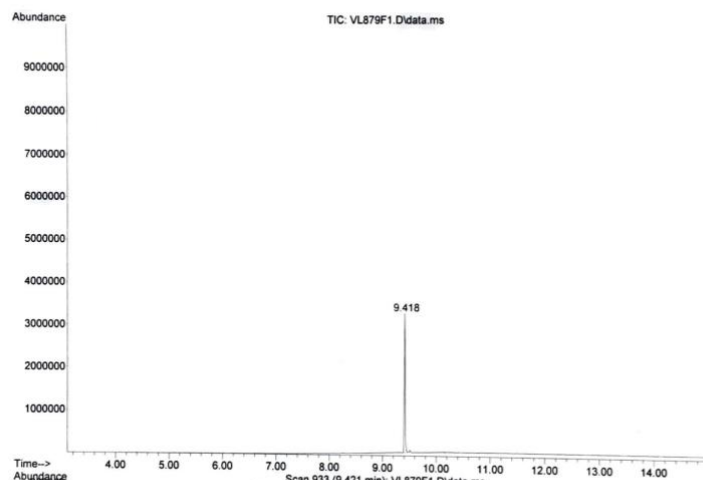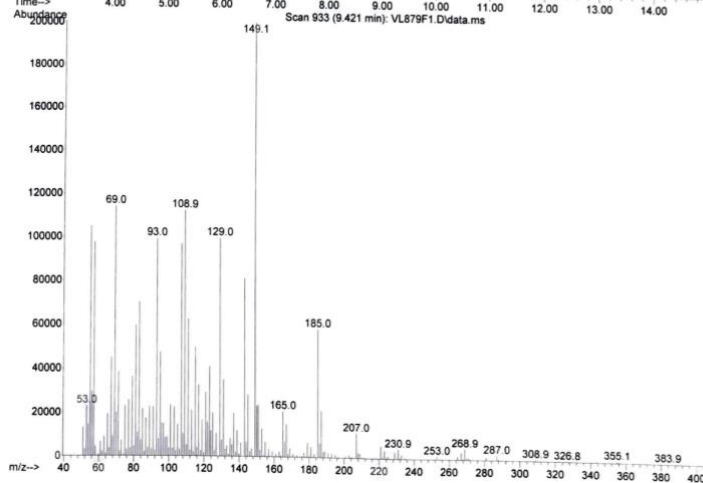

# Area Percent Report

Data Path : D:\DataMS\2017\08-2017\25082017\  
 Data File : VL879F1.D  
 Acq On : 25 Aug 2017 14:36  
 Operator : VL  
 Sample : VL879F1  
 Misc :  
 ALS Vial : 12 Sample Multiplier: 1

Integration Parameters: autoint1.e  
 Integrator: ChemStation

Method : C:\msdchem\1\methods\MSWAXconfig\hexadecenal.M  
 Title :

Signal : TIC: VL879F1.D\data.ms

| peak # | R.T. min | first scan | max scan | last scan | PK TY | peak height | corr. area | corr. % max. | % of total |
|--------|----------|------------|----------|-----------|-------|-------------|------------|--------------|------------|
| 1      | 9.415    | 928        | 932      | 940       | M     | 3263206     | 37874422   | 100.00%      | 98.492%    |
| 2      | 9.511    | 945        | 946      | 949       | M2    | 53772       | 579768     | 1.53%        | 1.508%     |

Sum of corrected areas: 38454190

hexadecenal.M Mon Oct 12 17:23:26 2020

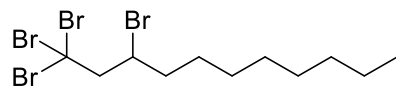

Chemical Formula:  $C_{11}H_{20}Br_4$

Molecular Weight: 471,90

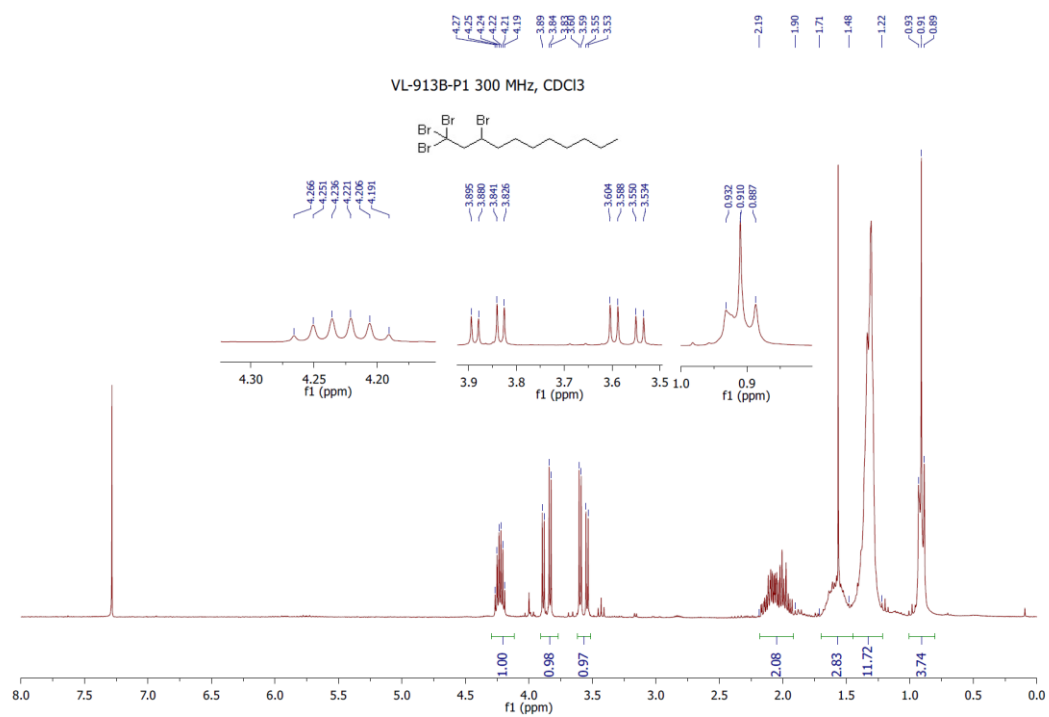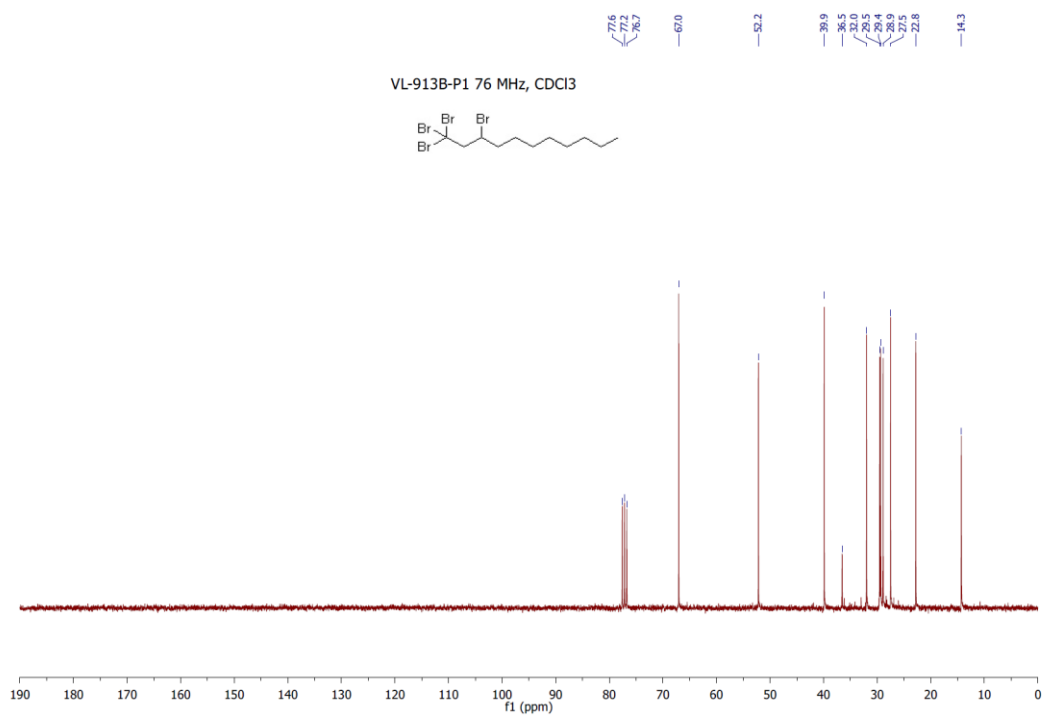

File :D:\DataMS\2017\07-2017\20-07-2017\VL913B-P1-L.D  
 Operator : VL  
 Acquired : 21 Jul 2017 4:26 using AcqMethod PDTLOURD.M  
 Instrument : 7890 5975  
 Sample Name: VL913B-P1  
 Misc Info :  
 Vial Number: 25

# Area Percent Report

Data Path : D:\DataMS\2017\07-2017\20-07-2017\  
 Data File : VL913B-P1-L.D  
 Acq On : 21 Jul 2017 4:26  
 Operator : VL  
 Sample : VL913B-P1  
 Misc :  
 ALS Vial : 25 Sample Multiplier: 1

Integration Parameters: autoint1.e  
 Integrator: ChemStation

Method : C:\msdchem\1\methods\DBWAXconfig\hexadecenal.M  
 Title :

Signal : TIC: VL913B-P1-L.D\data.ms

| peak<br># | R.T.<br>min | first<br>scan | max<br>scan | last<br>scan | PK<br>TY | peak<br>height | corr.<br>area | corr.<br>% max. | % of<br>total |
|-----------|-------------|---------------|-------------|--------------|----------|----------------|---------------|-----------------|---------------|
| 1         | 4.296       | 206           | 211         | 233          | M        | 37285          | 814321        | 12.88%          | 4.664%        |
| 2         | 5.801       | 467           | 474         | 497          | M        | 45706          | 788388        | 12.47%          | 4.516%        |
| 3         | 7.541       | 771           | 778         | 850          | M3       | 114109         | 4721303       | 74.69%          | 27.042%       |
| 4         | 8.972       | 1014          | 1028        | 1042         | M4       | 153591         | 6320921       | 100.00%         | 36.203%       |
| 5         | 9.183       | 1051          | 1065        | 1102         | M8       | 79145          | 4814505       | 76.17%          | 27.575%       |

Sum of corrected areas: 17459439

hexadecenal.M Mon Oct 12 17:19:55 2020

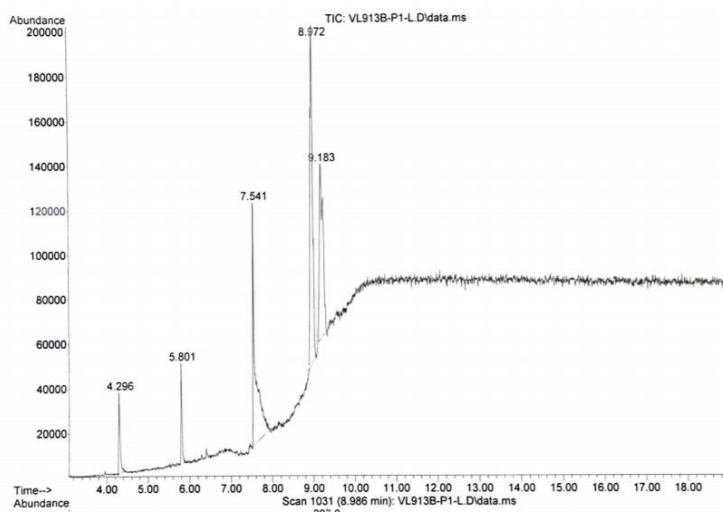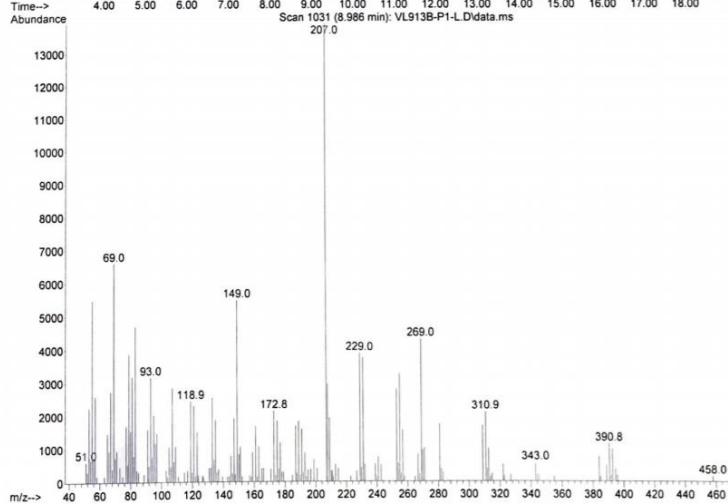



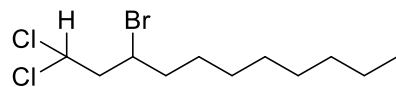

Chemical Formula: C<sub>11</sub>H<sub>21</sub>BrCl<sub>2</sub>

Molecular Weight: 304,09

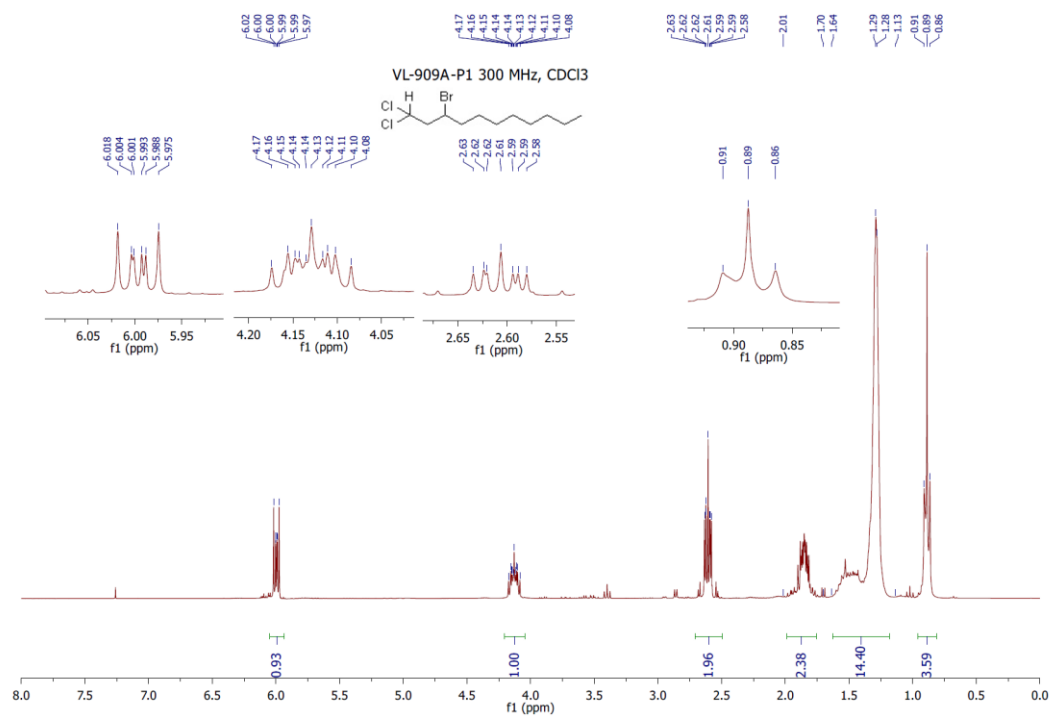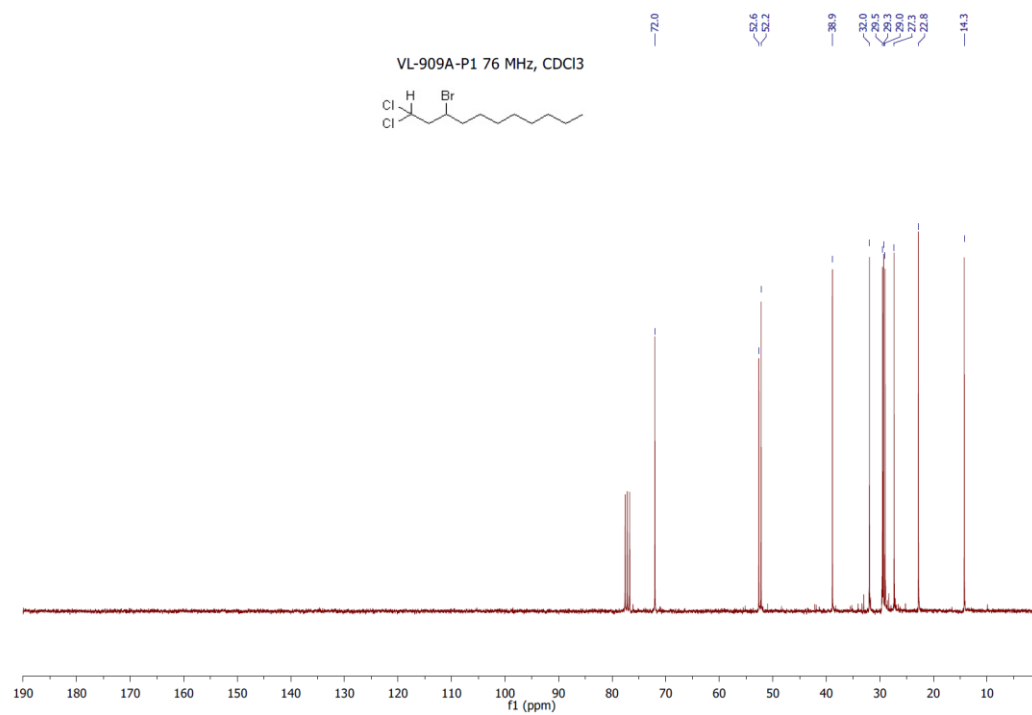

File :D:\DataMS\2017\07-2017\20-07-2017\VL909A-P1.D  
 Operator : VL  
 Acquired : 20 Jul 2017 17:49 using AcqMethod NORMAL.M  
 Instrument : 7890 5975  
 Sample Name: VL909A-P1  
 Misc Info :  
 Vial Number: 11

# Area Percent Report

Data Path : D:\DataMS\2017\07-2017\20-07-2017\  
 Data File : VL909A-P1.D  
 Acq On : 20 Jul 2017 17:49  
 Operator : VL  
 Sample : VL909A-P1  
 Misc :  
 ALS Vial : 11 Sample Multiplier: 1  
 Integration Parameters: autoint1.e  
 Integrator: ChemStation  
 Method : C:\msdchem\1\methods\DBWAXconfig\hexadecenal.M  
 Title :

Signal : TIC: VL909A-P1.D\data.ms

| peak # | R.T. min | first scan | max scan | last scan | PK TY | peak height | corr. area | corr. % max. | % of total |
|--------|----------|------------|----------|-----------|-------|-------------|------------|--------------|------------|
| 1      | 9.004    | 863        | 872      | 890       | BB    | 4408175     | 53399979   | 100.00%      | 97.415%    |
| 2      | 9.161    | 891        | 895      | 901       | M     | 109359      | 1416754    | 2.65%        | 2.585%     |

Sum of corrected areas: 54816733

hexadecenal.M Tue Oct 13 11:11:27 2020

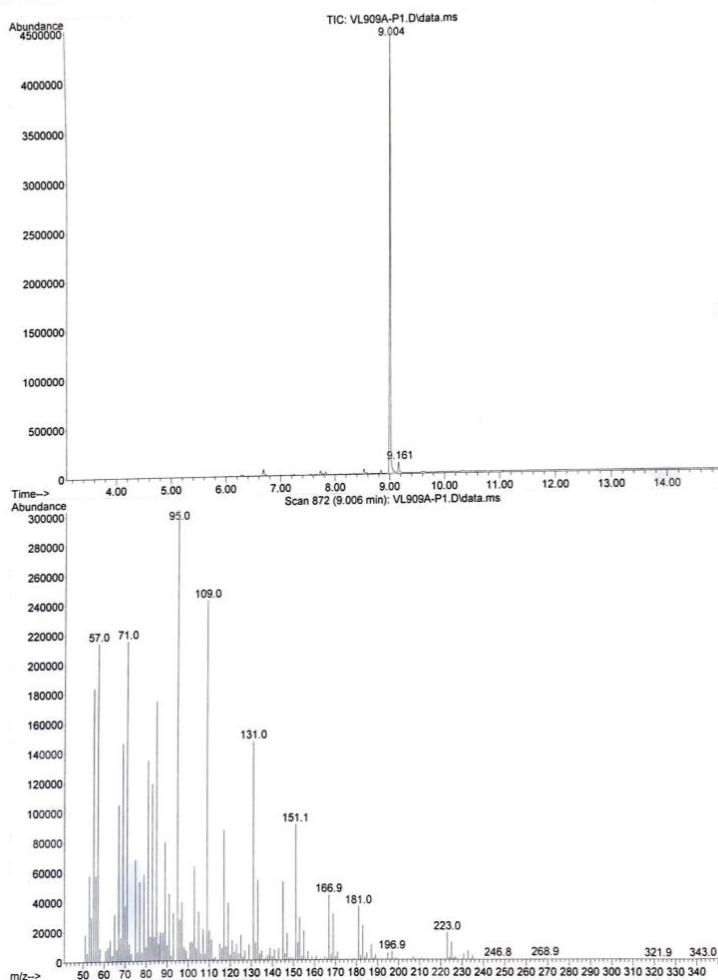

Data: CL-210720-VL909AP frais 3  
 Sample Name:  
 Description:  
 Ionization Mode: CI+  
 History Determine m/z[Peak Detect[Centroid,30,Area],Smooth[21]],Correct Base[],Average[MS[1]] 9.84..9.85)

Acquired:12:00:00 AM  
 Operator:AccuTof  
 Mass Calibration data CAL-291118-CAL-EI-class4  
 Created:7/21/2020 5:47:57 PM  
 Created by:AccuTof

Charge number: 1  
 Element: <sup>12</sup>C: 0 .. 50, <sup>1</sup>H: 0 .. 100, <sup>10</sup>B: 0 .. 0, <sup>79</sup>Br: 1 .. 1, <sup>35</sup>Cl: 2 .. 2, <sup>16</sup>O: 0 .. 0  
 Tolerance: 50.00(ppm)

Unsaturation Number:-1000.0 .. 2000.0 (Fraction Both)

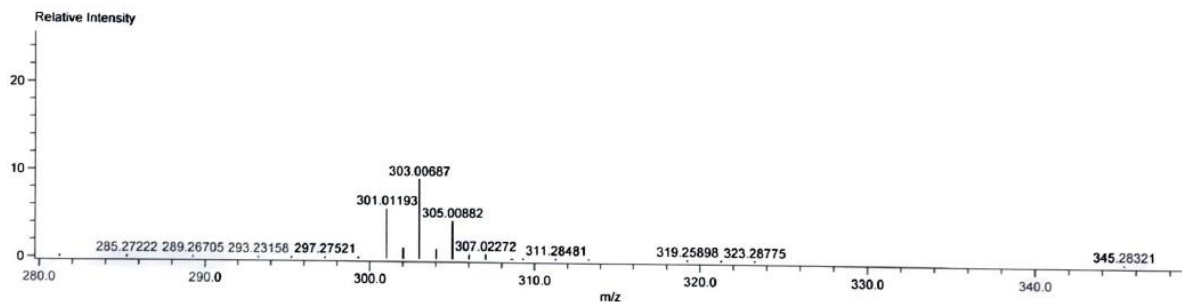

| Mass      | Intensity | Calc. Mass | Mass Difference (ppm) | Possible Formula                                                                                                       | Unsaturation Number |
|-----------|-----------|------------|-----------------------|------------------------------------------------------------------------------------------------------------------------|---------------------|
| 301.01193 | 22574.81  | 301.01254  | -2.03                 | <sup>12</sup> C <sub>11</sub> <sup>1</sup> H <sub>26</sub> <sup>79</sup> Br <sub>1</sub> <sup>35</sup> Cl <sub>2</sub> | 0.5                 |

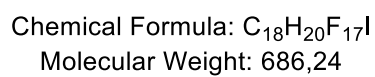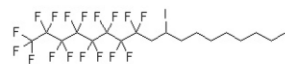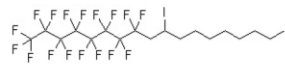



File : D:\DataMS\2017\07-2017\20-07-2017\VL909D-P1.D  
 Operator : VL  
 Acquired : 20 Jul 2017 22:42 using AcqMethod NORMAL.M  
 Instrument : 7890 5975  
 Sample Name: VL909D-P1  
 Misc Info :  
 Vial Number: 27

Area Percent Report

Data Path : D:\DataMS\2017\07-2017\20-07-2017\  
 Data File : VL909D-P1.D  
 Acq On : 20 Jul 2017 22:42  
 Operator : VL  
 Sample : VL909D-P1  
 Misc :  
 ALS Vial : 27 Sample Multiplier: 1

Integration Parameters: autoint1.e  
 Integrator: ChemStation

Method : C:\msdchem\1\methods\DBWAXconfig\hexadecenal.M  
 Title :

Signal : TIC: VL909D-P1.D\data.ms

| peak # | R.T. min | first scan | max scan | last scan | PK TY | peak height | corr. area | corr. % max. | % of total |
|--------|----------|------------|----------|-----------|-------|-------------|------------|--------------|------------|
| 1      | 8.074    | 731        | 735      | 743       | M     | 3927605     | 39640188   | 100.00%      | 100.000%   |

Sum of corrected areas: 39640188

hexadecenal.M Tue Oct 13 11:12:36 2020

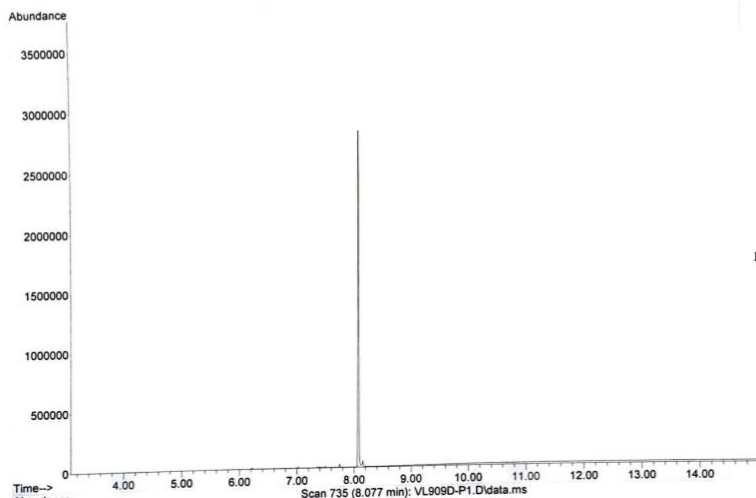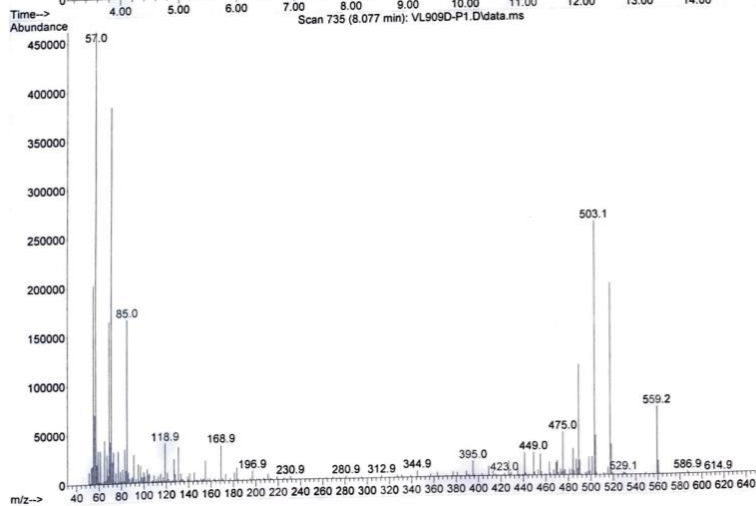

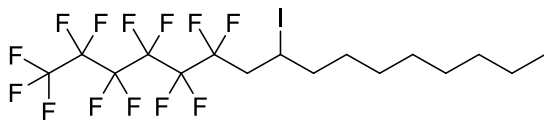

Chemical Formula:  $C_{16}H_{20}F_{13}I$

Molecular Weight: 586,22

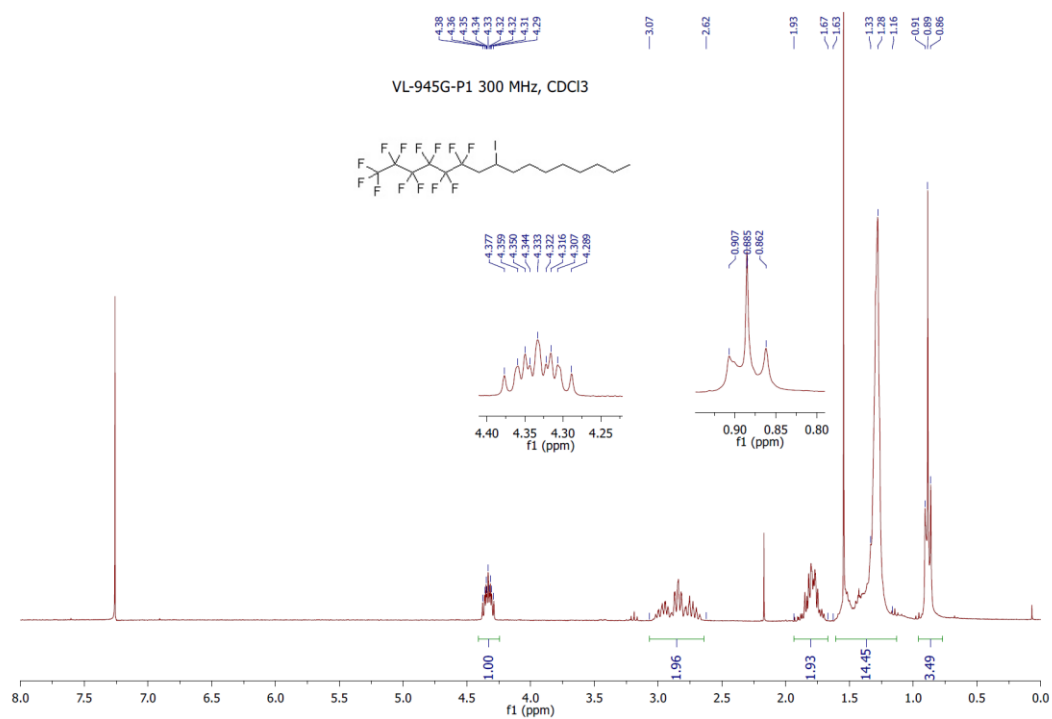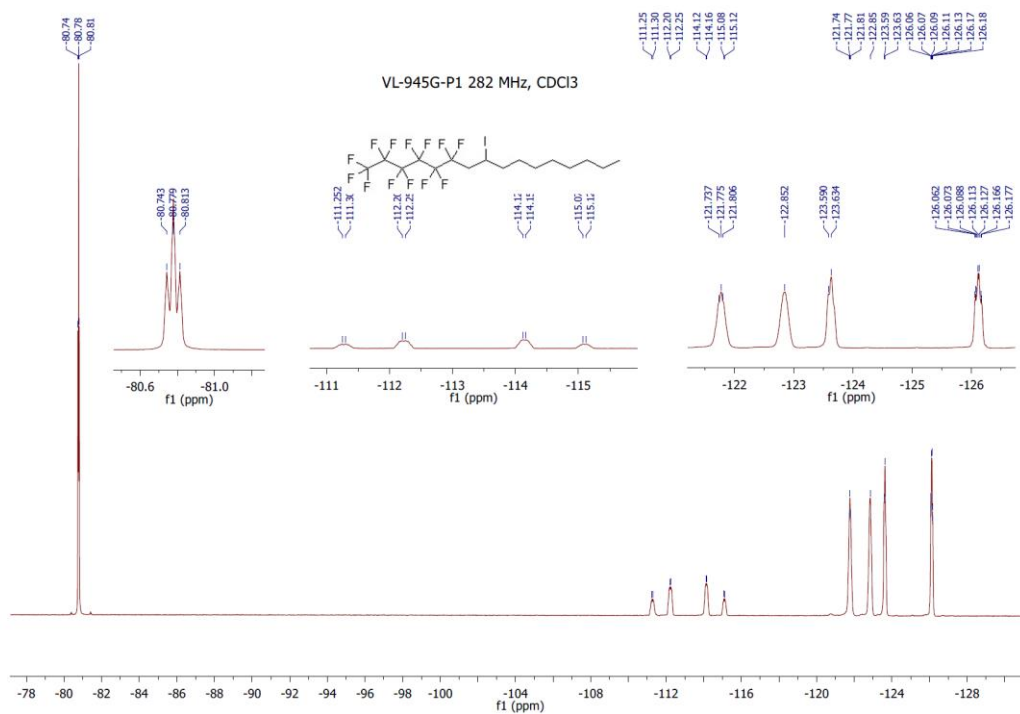

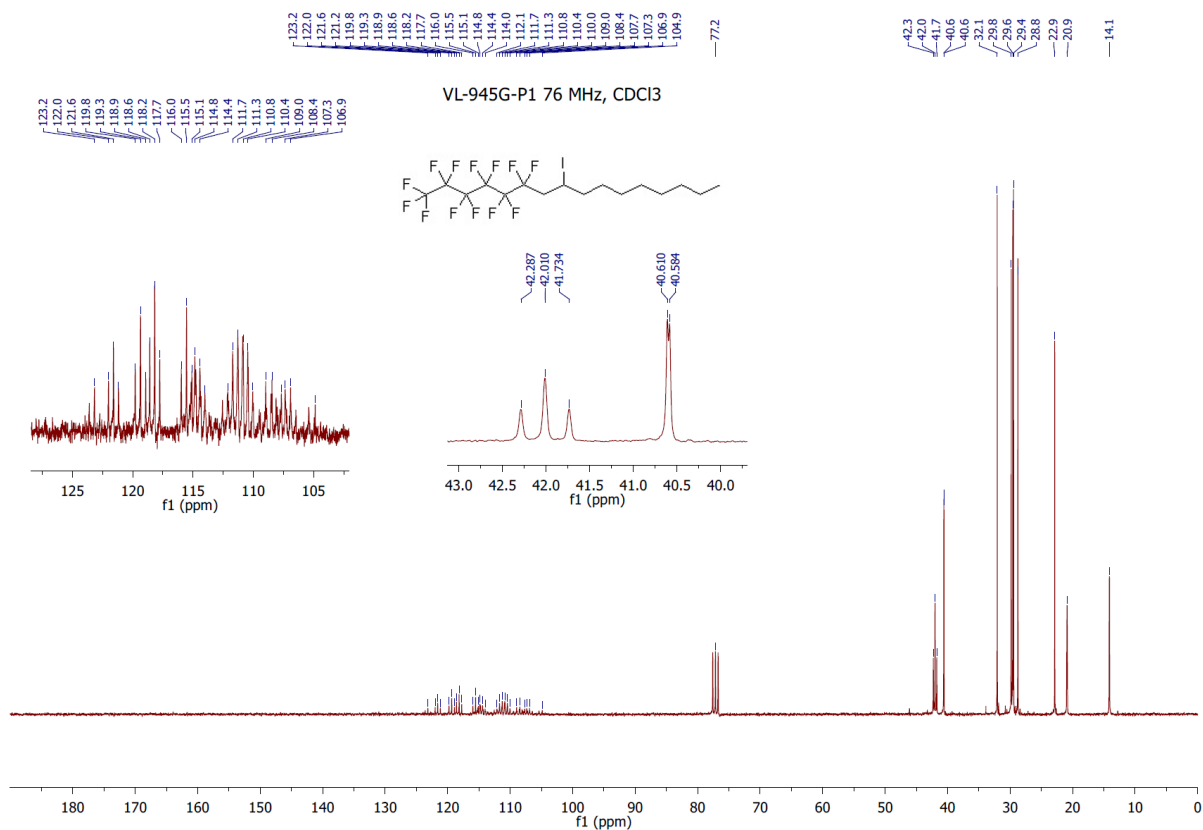

File :D:\DataMS\2017\08-2017\25082017\VL945GP1-2.D  
 Operator : VL  
 Acquired : 25 Aug 2017 14:17 using AcqMethod NORMAL.M  
 Instrument : 7890 5975  
 Sample Name: VL945GP1  
 Misc Info :  
 Vial Number: 11

Area Percent Report

Data Path : D:\DataMS\2017\08-2017\25082017\  
 Data File : VL945GP1-2.D  
 Acq On : 25 Aug 2017 14:17  
 Operator : VL  
 Sample : VL945GP1  
 Misc :  
 ALS Vial : 11 Sample Multiplier: 1

Integration Parameters: autoint1.e  
 Integrator: ChemStation

Method : C:\msdchem\1\methods\DBWAXconfig\hexadecenal.M  
 Title :

Signal : TIC: VL945GP1-2.D\data.ms

| peak # | R.T. min | first scan | max scan | last scan | PK TY | peak height | corr. area | corr. % max. | % of total |
|--------|----------|------------|----------|-----------|-------|-------------|------------|--------------|------------|
| 1      | 7.599    | 661        | 665      | 674       | M2    | 1240777     | 12816362   | 100.00%      | 100.000%   |

Sum of corrected areas: 12816362

hexadecenal.M Mon Oct 12 17:04:16 2020

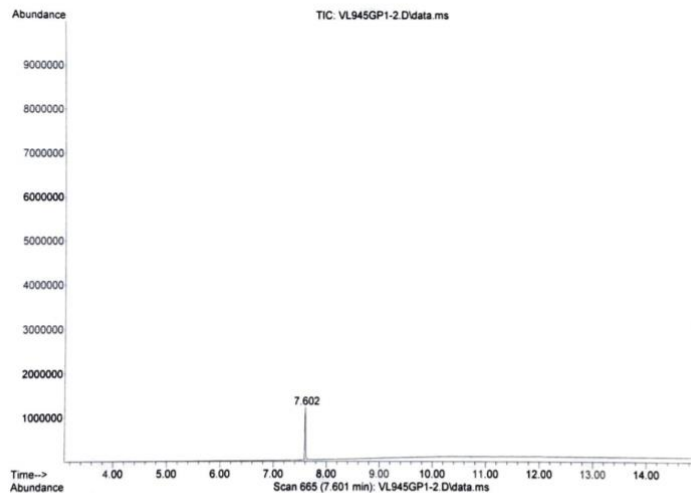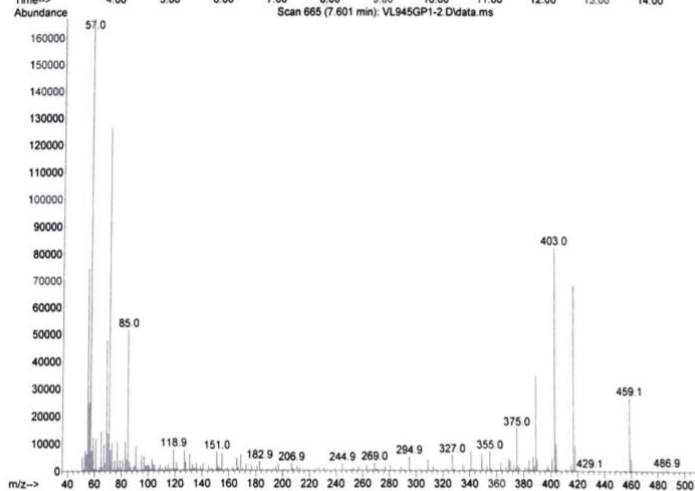



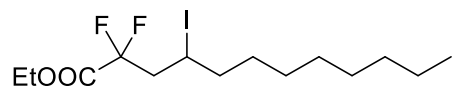

Chemical Formula: C<sub>14</sub>H<sub>25</sub>F<sub>2</sub>IO<sub>2</sub>

Molecular Weight: 390,25

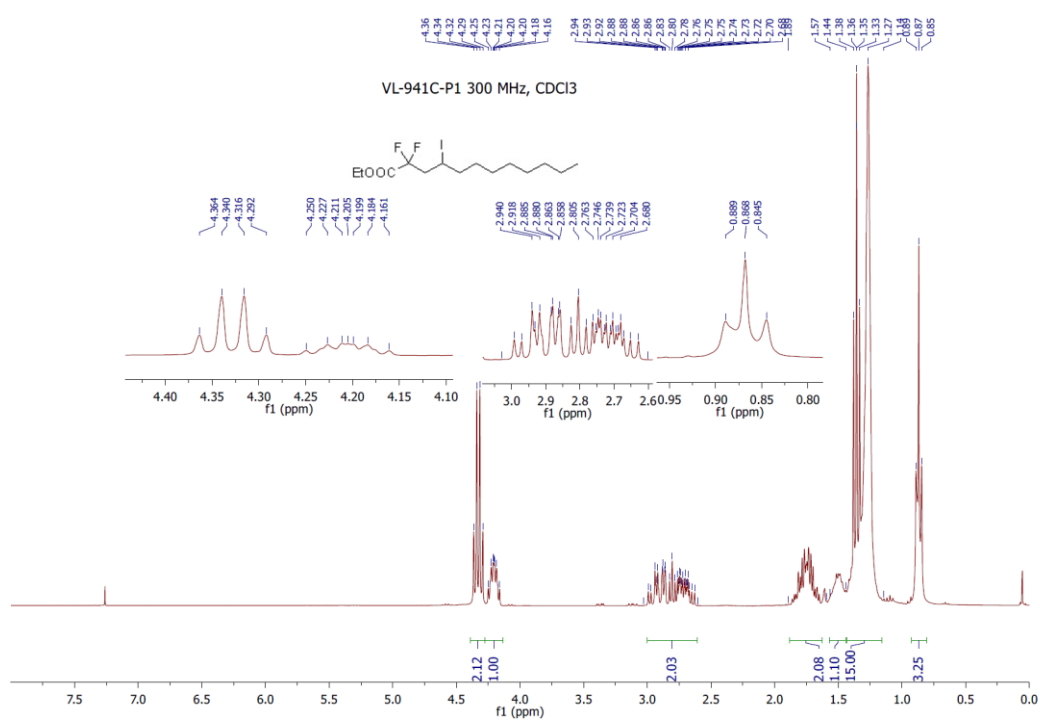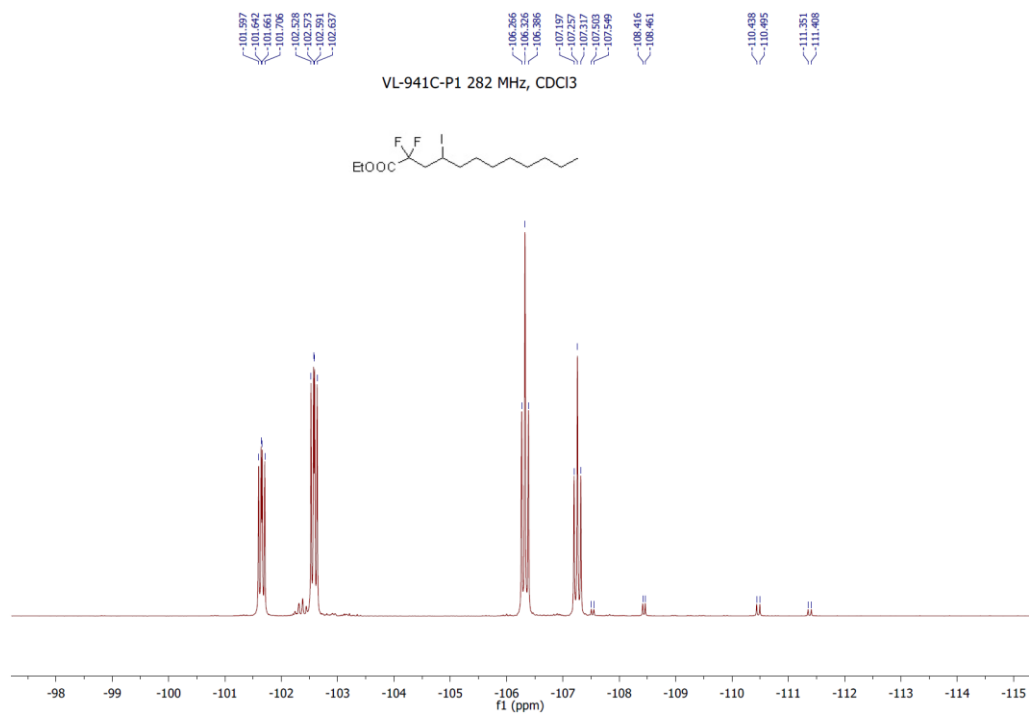

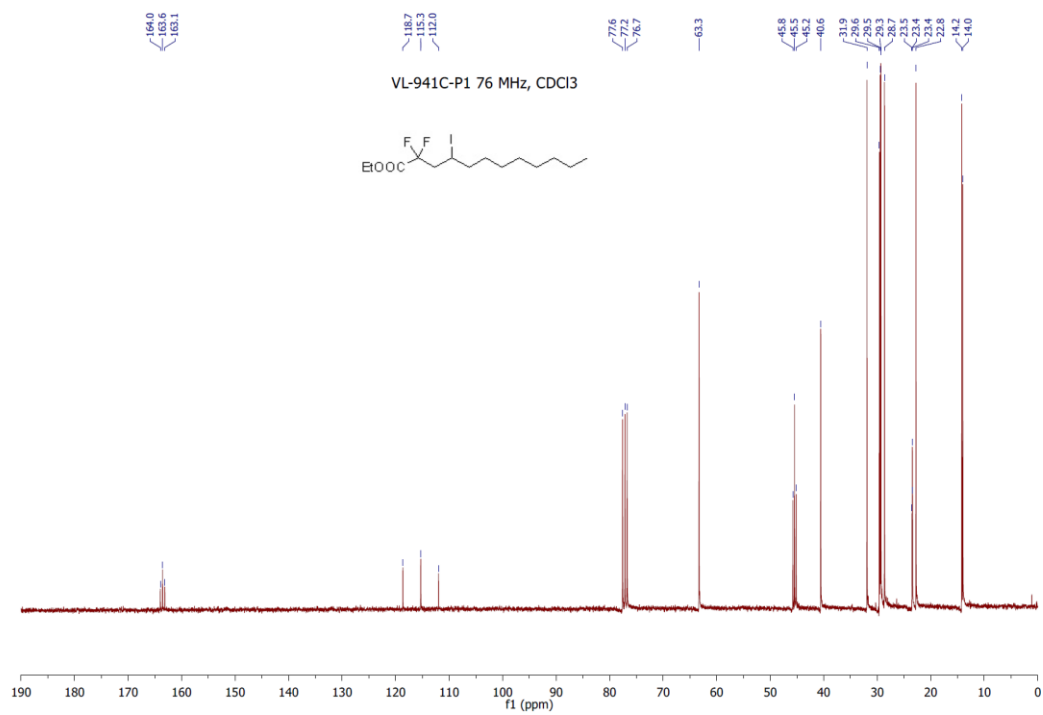

File :D:\DataMS\2017\07-2017\20-07-2017\VL941CP-1.D  
 Operator : VL  
 Acquired : 20 Jul 2017 20:52 using AcqMethod NORMAL.M  
 Instrument : 7890 5975  
 Sample Name: VL941CP-1  
 Misc Info :  
 Vial Number: 21

# Area Percent Report

Data Path : D:\DataMS\2017\07-2017\20-07-2017\  
 Data File : VL941CP-1.D  
 Acq On : 20 Jul 2017 20:52  
 Operator : VL  
 Sample : VL941CP-1  
 Misc :  
 ALS Vial : 21 Sample Multiplier: 1

Integration Parameters: autoint1.e  
 Integrator: ChemStation

Method : C:\msdchem\1\methods\DBWAXconfig\hexadecenal.M  
 Title :

Signal : TIC: VL941CP-1.D\data.ms

| peak # | R.T. min | first scan | max scan | last scan | PK TY | peak height | corr. area | corr. % max. | % of total |
|--------|----------|------------|----------|-----------|-------|-------------|------------|--------------|------------|
| 1      | 9.974    | 1010       | 1015     | 1028      | M     | 2894124     | 39411859   | 100.00%      | 100.000%   |

Sum of corrected areas: 39411859

hexadecenal.M Mon Oct 12 17:21:16 2020

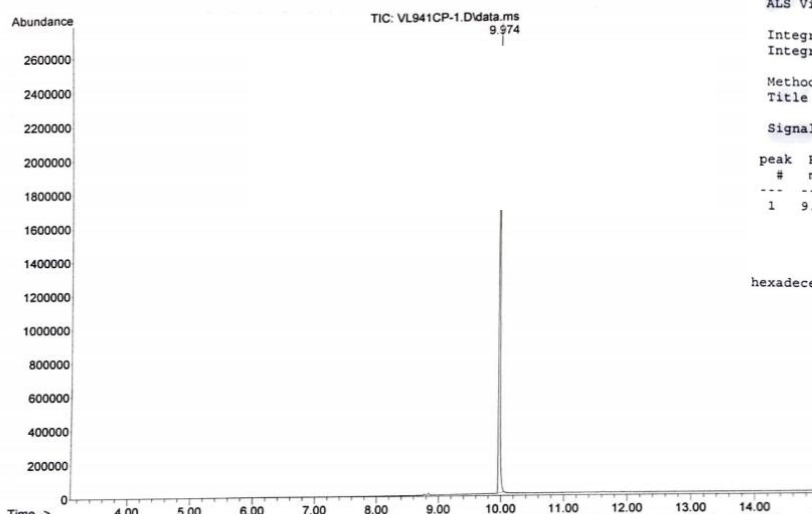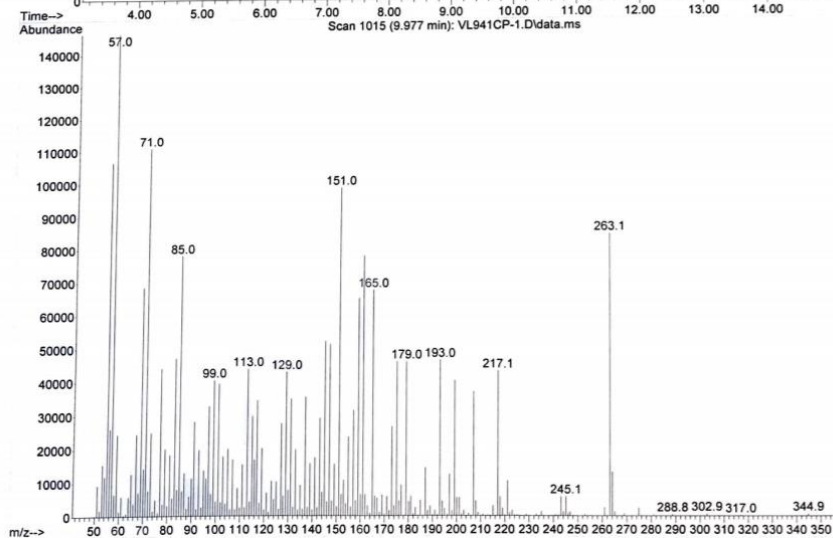

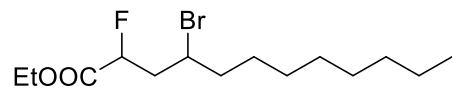

Chemical Formula:  $C_{14}H_{26}BrFO_2$

Molecular Weight: 325,26

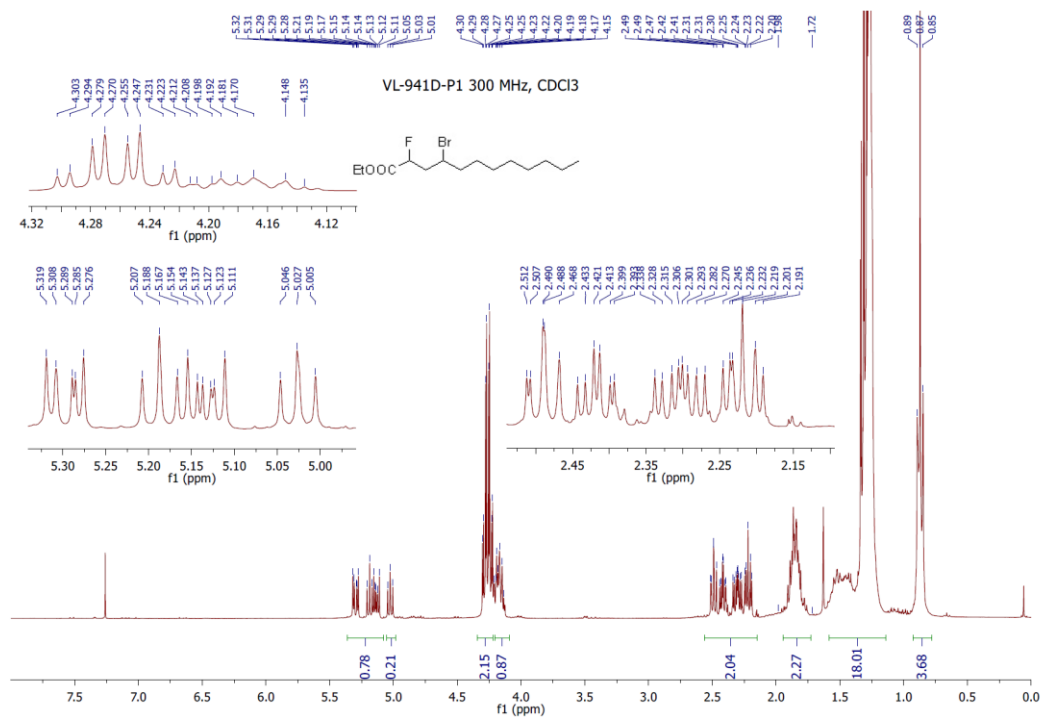

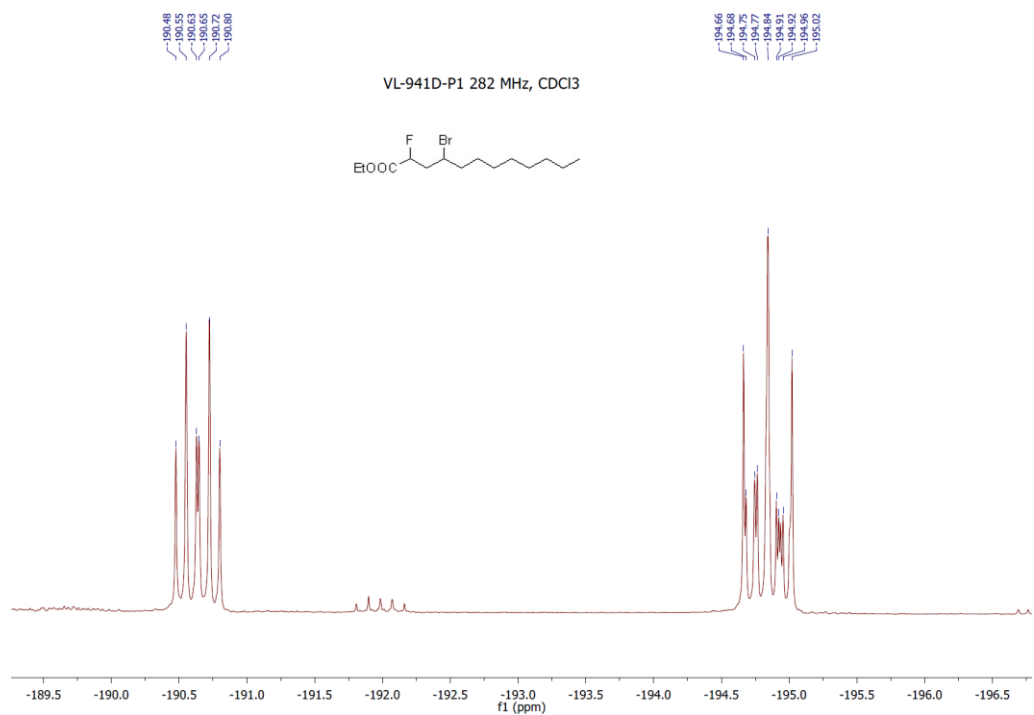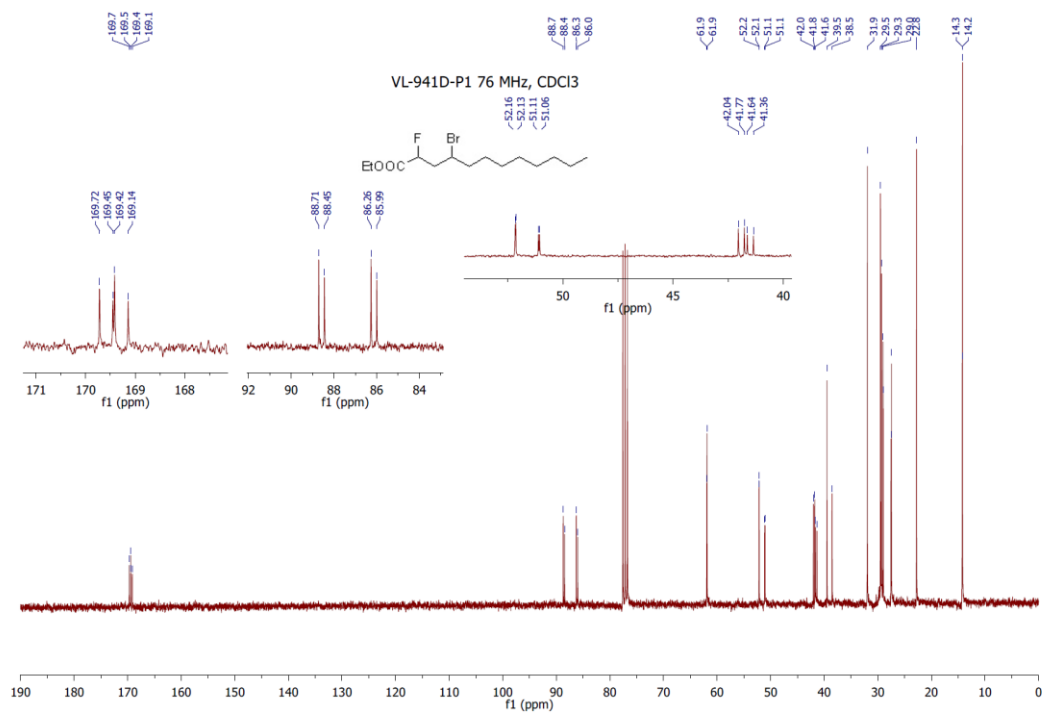

File :D:\DataMS\2017\07-2017\20-07-2017\VL941D-P1.D  
 Operator : VL  
 Acquired : 20 Jul 2017 19:57 using AcqMethod NORMAL.M  
 Instrument : 7890 5975  
 Sample Name : VL941D-P1  
 Misc Info :  
 Vial Number: 18

# Area Percent Report

Data Path : D:\DataMS\2017\07-2017\20-07-2017\  
 Data File : VL941D-P1.D  
 Acq On : 20 Jul 2017 19:57  
 Operator : VL  
 Sample : VL941D-P1  
 Misc :  
 ALS Vial : 18 Sample Multiplier: 1

Integration Parameters: autoint1.e  
 Integrator: ChemStation

Method : C:\msdchem\1\methods\DBWAXconfig\hexadecenal.M

Title :

Signal : TIC: VL941D-P1.D\data.ms

| peak # | R.T. min | first scan | max scan | last scan | PK TY | peak height | corr. area | corr. % max. | % of total |
|--------|----------|------------|----------|-----------|-------|-------------|------------|--------------|------------|
| 1      | 10.019   | 1013       | 1021     | 1029      | M     | 394684      | 5392494    | 68.82%       | 40.766%    |
| 2      | 10.173   | 1036       | 1044     | 1061      | M     | 446647      | 7835502    | 100.00%      | 59.234%    |

Sum of corrected areas: 13227996

hexadecenal.M Mon Oct 12 20:01:36 2020

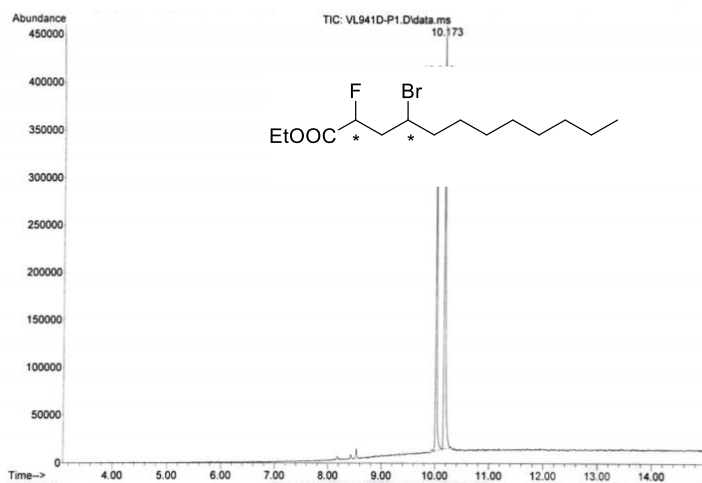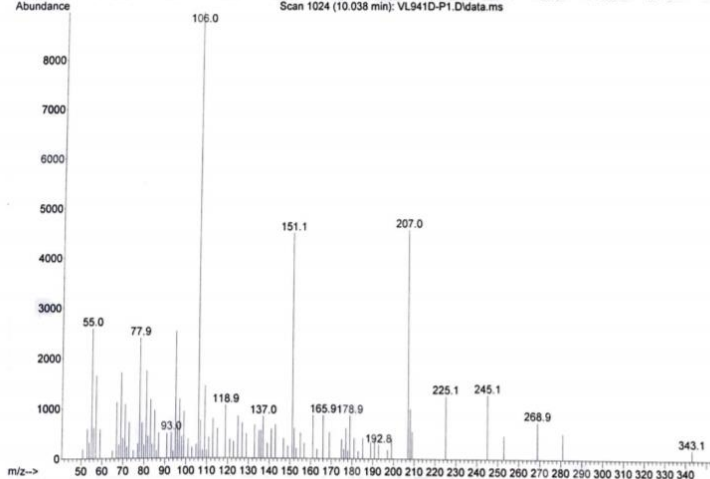

File :D:\DataMS\2017\07-2017\20-07-2017\VL941D-P1.D  
 Operator : VL  
 Acquired : 20 Jul 2017 19:57 using AcqMethod NORMAL.M  
 Instrument : 7890 5975  
 Sample Name: VL941D-P1  
 Misc Info :  
 Vial Number: 18

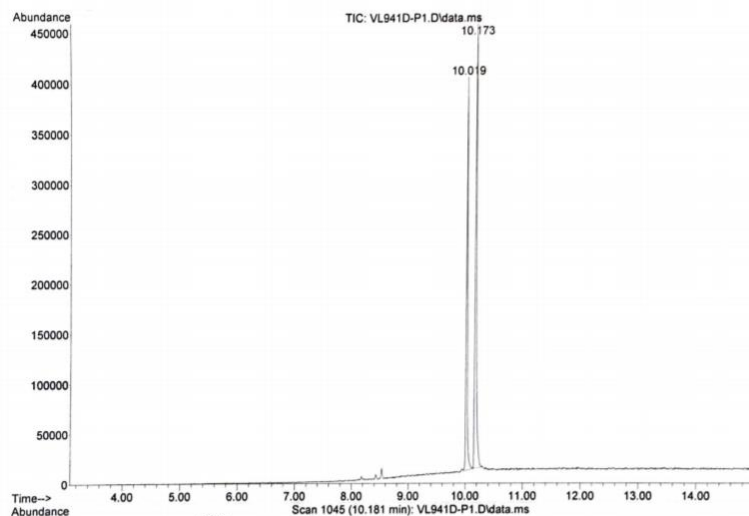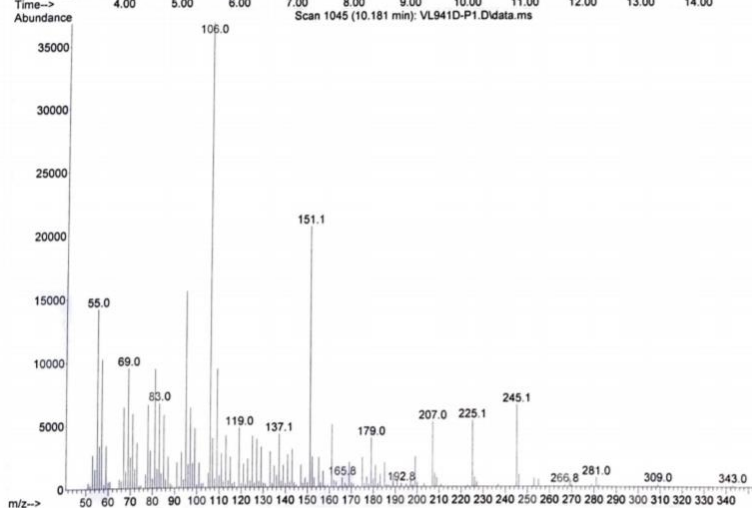

D:\2020\03-Mars\QEXACTIVE-020320-VL945CP.raw

3/2/2020 5:31:28 PM

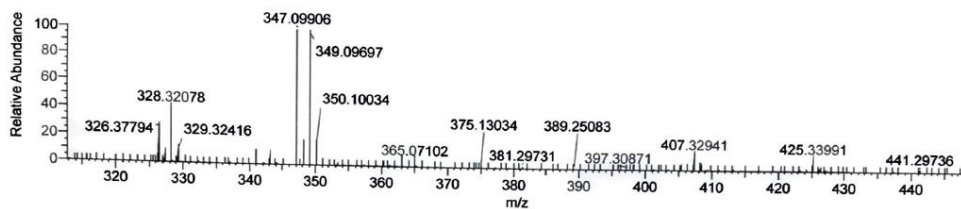

NL: 2.04E8  
 QEXACTIVE-020320-VL945CP #63-70 RT:  
 1.4-1.54 AV, 4 SB, 13 0.60-0.84, 1.96-2.30  
 NL: 2.04E8  
 T: FTMS + p ESI Full ms  
 [95.0000-1425.0000]

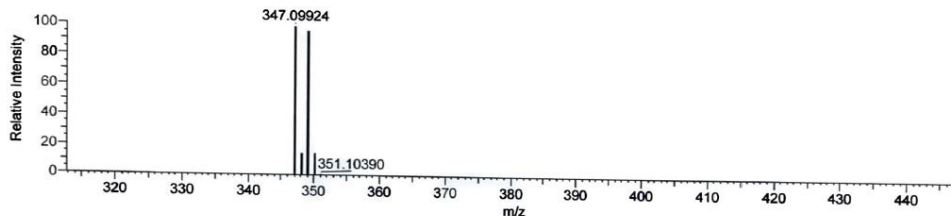

NL: 4.33E5  
 C14H26O2Br1F1Na1 Chrg 1 R: 217767  
 Res. Pwr. @FWHM

| Peak Mass | Display Formula                 | Delta [ppm] | Theo. mass | # Matched Iso. | MSMS Matched Fragments (Collection) |
|-----------|---------------------------------|-------------|------------|----------------|-------------------------------------|
| 347.09906 | $C_{14}H_{26}O_2^{79}Br^{23}Na$ | -0.53       | 347.09924  | 6              |                                     |

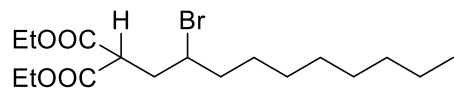

Chemical Formula:  $C_{17}H_{31}BrO_4$

Molecular Weight: 379,34

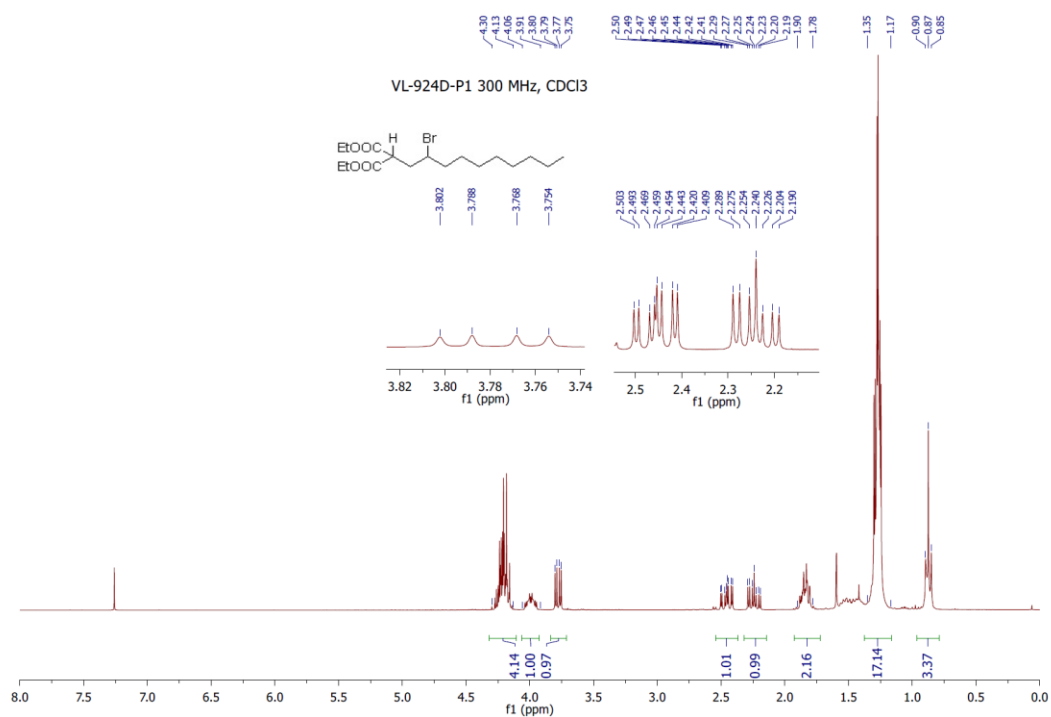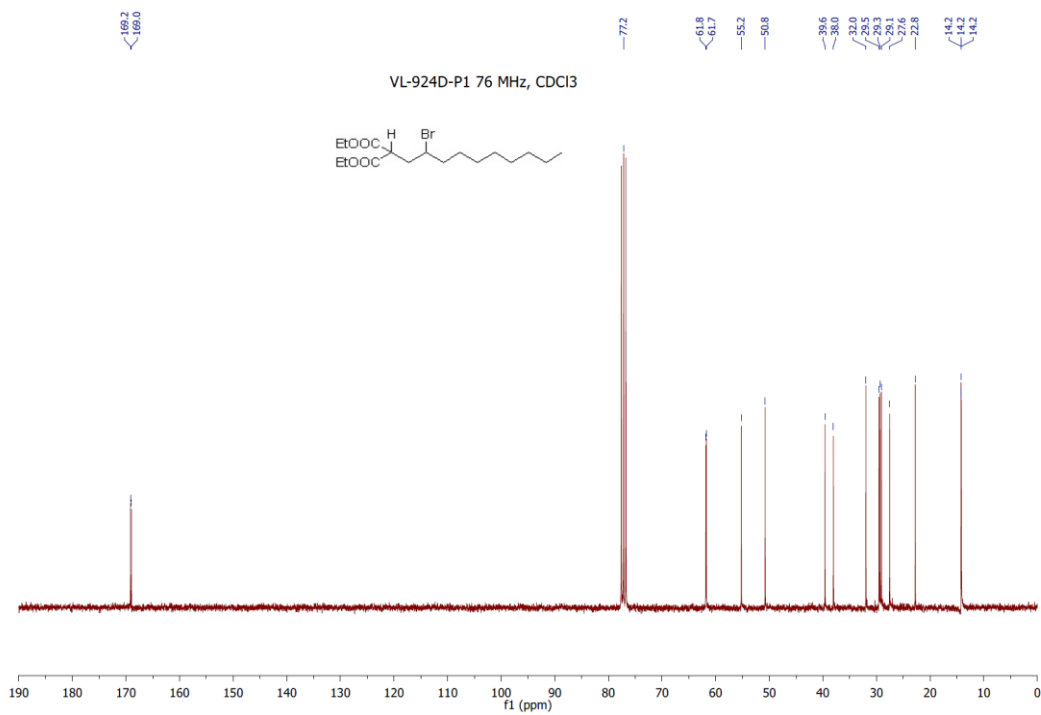



File :D:\DataMS\2017\07-2017\20-07-2017\VL924D-P1.D  
 Operator : VL  
 Acquired : 20 Jul 2017 21:29 using AcqMethod NORMAL.M  
 Instrument : 7890 5975  
 Sample Name: VL924D-P1  
 Misc Info :  
 Vial Number: 23

# Area Percent Report

Data Path : D:\DataMS\2017\07-2017\20-07-2017\  
 Data File : VL924D-P1.D  
 Acq On : 20 Jul 2017 21:29  
 Operator : VL  
 Sample : VL924D-P1  
 Misc :  
 ALS Vial : 23 Sample Multiplier: 1

Integration Parameters: autoint1.e  
 Integrator: ChemStation

Method : C:\msdchem\1\methods\MSWAXconfig\hexadecenal.M  
 Title :

Signal : TIC: VL924D-P1.D\data.ms

| peak<br># | R.T.<br>min | first<br>scan | max<br>scan | last<br>scan | PK<br>TY | peak<br>height | corr.<br>area | corr.<br>% max. | % of<br>total |
|-----------|-------------|---------------|-------------|--------------|----------|----------------|---------------|-----------------|---------------|
| 1         | 10.046      | 1020          | 1025        | 1043         | M        | 767628         | 11464620      | 24.18%          | 19.471%       |
| 2         | 12.850      | 1387          | 1438        | 1459         | M        | 1286094        | 47417206      | 100.00%         | 80.529%       |

Sum of corrected areas: 58881826

hexadecenal.M Tue Oct 13 10:59:45 2020

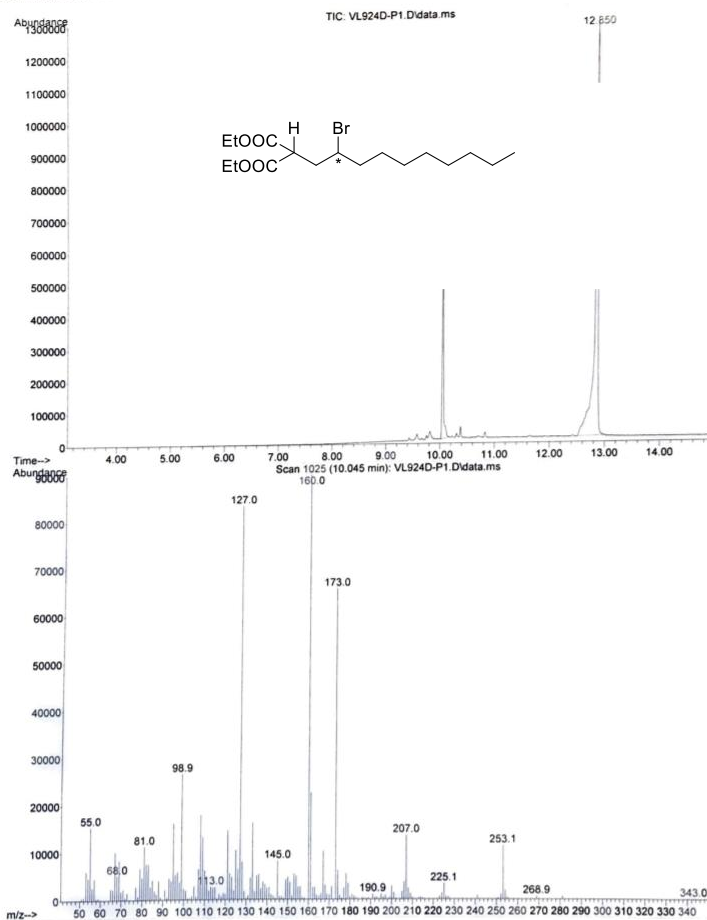

File :D:\DataMS\2017\07-2017\20-07-2017\VL924D-P1.D  
Operator : VL  
Acquired : 20 Jul 2017 21:29 using AcqMethod NORMAL.M  
Instrument : 7890 5975  
Sample Name: VL924D-P1  
Misc Info :  
Vial Number: 23

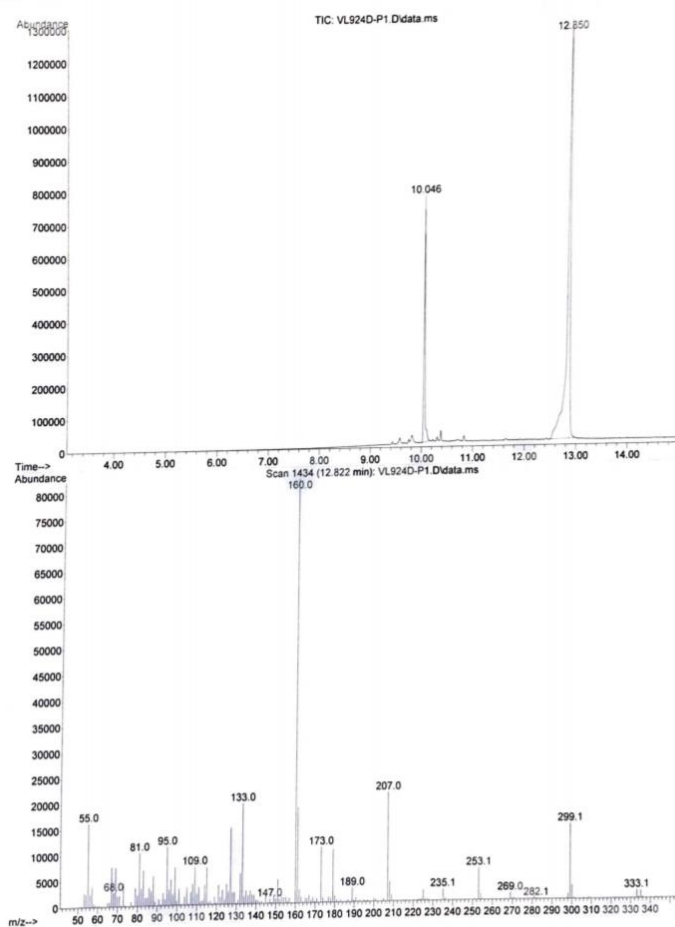

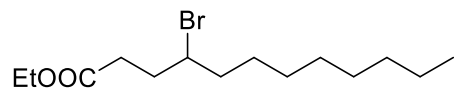

Chemical Formula: C<sub>14</sub>H<sub>27</sub>BrO<sub>2</sub>

Molecular Weight: 307,27

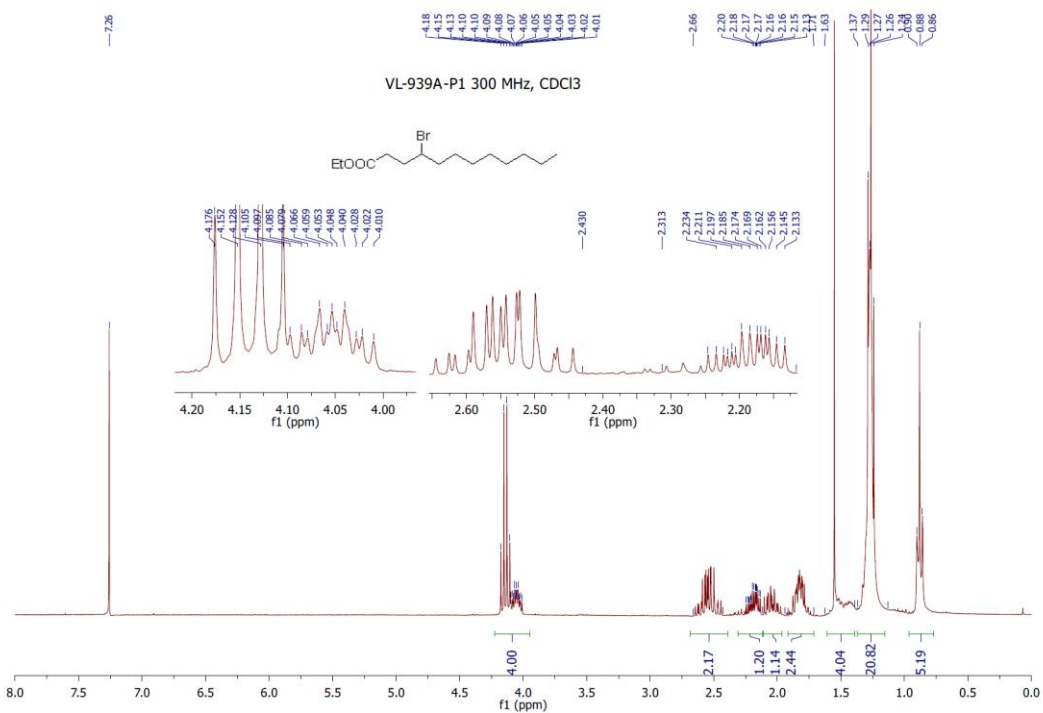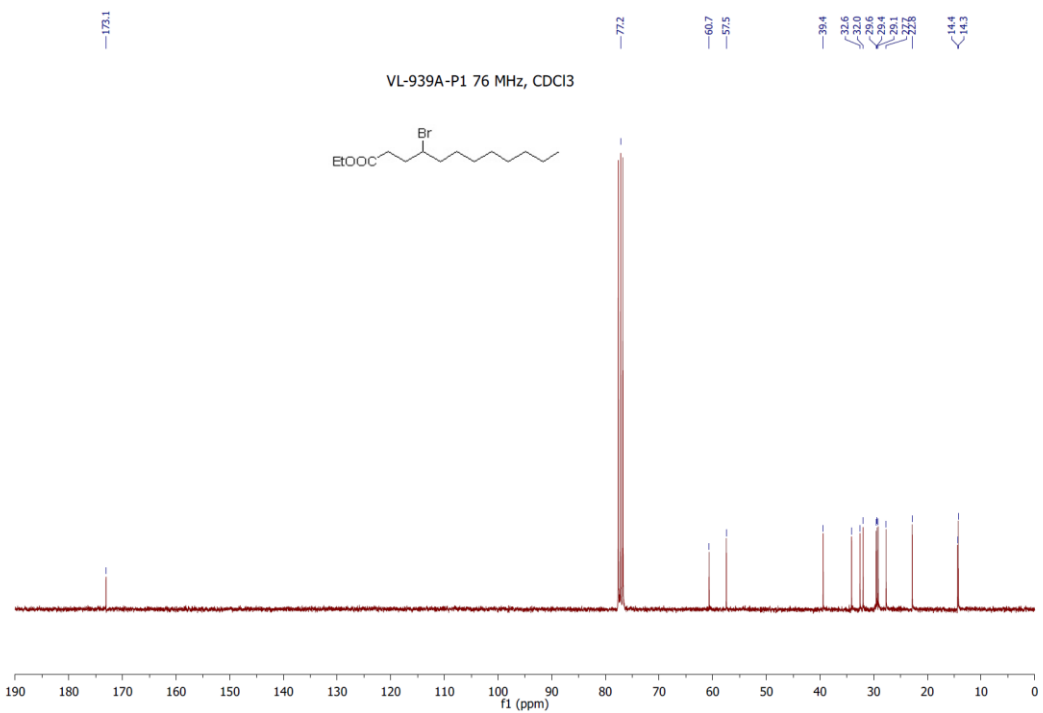

File :D:\DataMS\2017\08-2017\25082017\VL939AP.D  
 Operator : VL  
 Acquired : 25 Aug 2017 16:26 using AcqMethod NORMAL.M  
 Instrument : 7890 5975  
 Sample Name: VL939AP  
 Misc Info :  
 Vial Number: 18

# Area Percent Report

Data Path : D:\DataMS\2017\08-2017\25082017\  
 Data File : VL939AP.D  
 Acq On : 25 Aug 2017 16:26  
 Operator : VL  
 Sample : VL939AP  
 Misc :  
 ALS Vial : 18 Sample Multiplier: 1

Integration Parameters: autoint1.e  
 Integrator: ChemStation

Method : C:\msdchem\1\methods\DBWAXconfig\hexadecenal.M  
 Title :

Signal : TIC: VL939AP.D\data.ms

| peak<br># | R.T.<br>min | first<br>scan | max<br>scan | last<br>scan | PK<br>TY | peak<br>height | corr.<br>area | corr.<br>% max. | % of<br>total |
|-----------|-------------|---------------|-------------|--------------|----------|----------------|---------------|-----------------|---------------|
| 1         | 8.102       | 735           | 739         | 743          | M4       | 22813          | 303467        | 0.98%           | 0.920%        |
| 2         | 8.158       | 744           | 747         | 757          | M        | 81954          | 1204845       | 3.91%           | 3.651%        |
| 3         | 8.789       | 838           | 840         | 844          | M3       | 13514          | 142818        | 0.46%           | 0.433%        |
| 4         | 9.733       | 973           | 979         | 983          | M2       | 11988          | 256709        | 0.83%           | 0.778%        |
| 5         | 9.791       | 983           | 988         | 990          | M        | 25607          | 245963        | 0.80%           | 0.745%        |
| 6         | 9.926       | 993           | 1007        | 1021         | M        | 2126644        | 30848201      | 100.00%         | 93.474%       |

Sum of corrected areas: 33002004

hexadecenal.M Mon Oct 12 17:01:22 2020

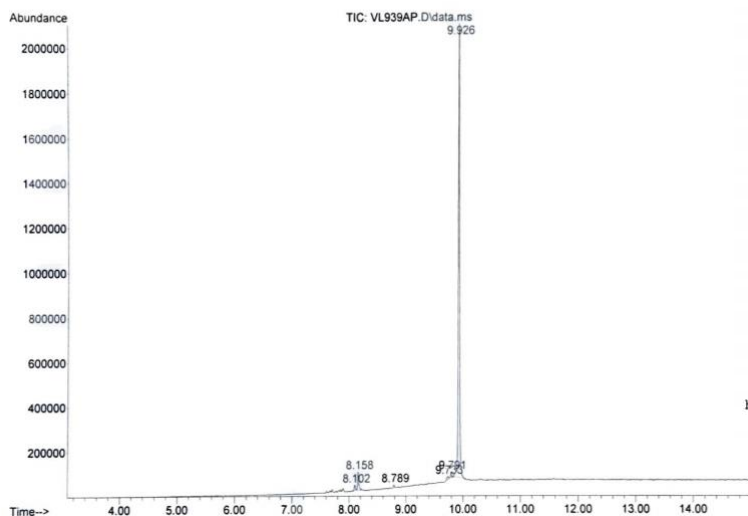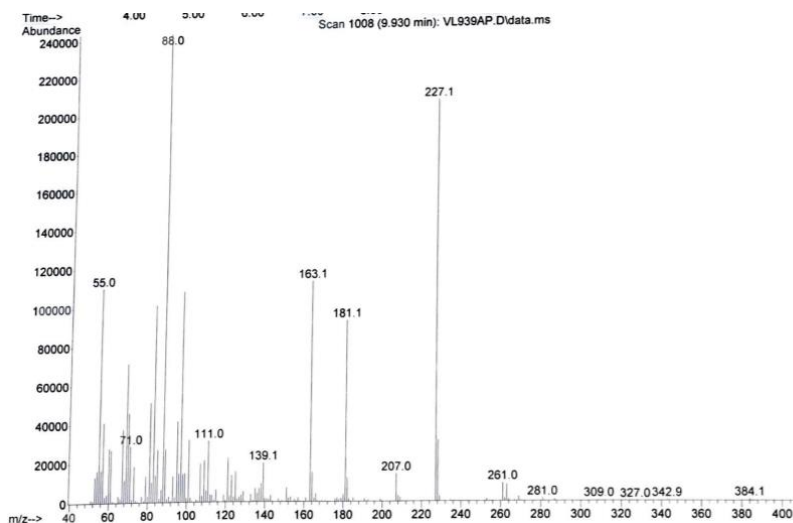

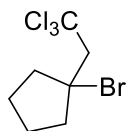

Chemical Formula: C<sub>7</sub>H<sub>10</sub>BrCl<sub>3</sub>

Molecular Weight: 280,4110

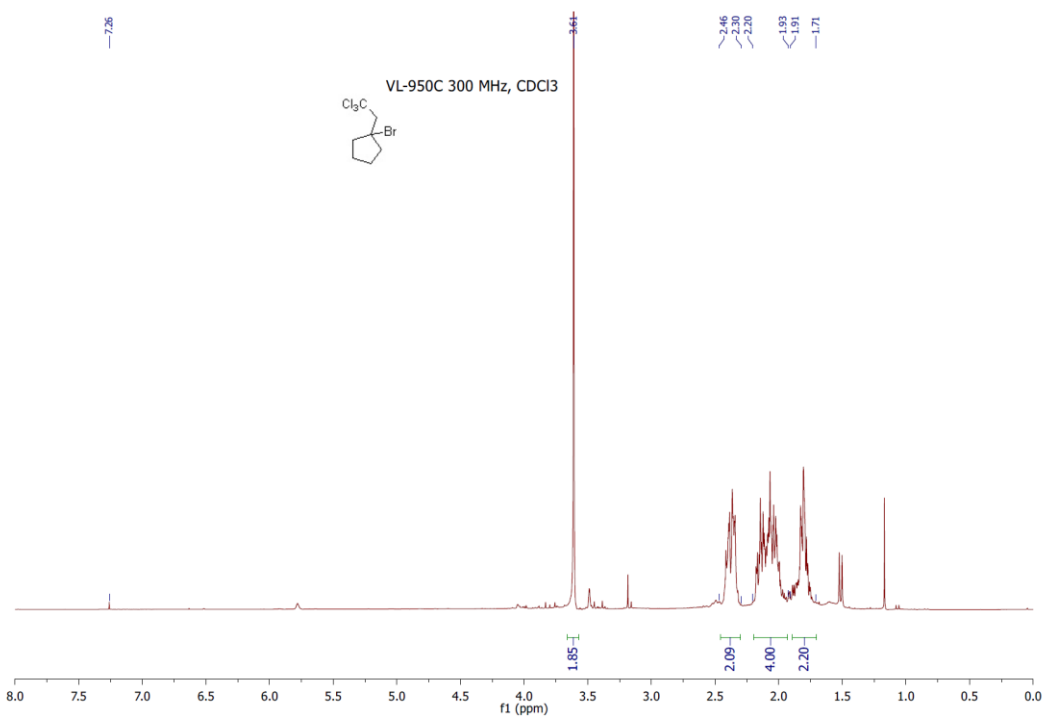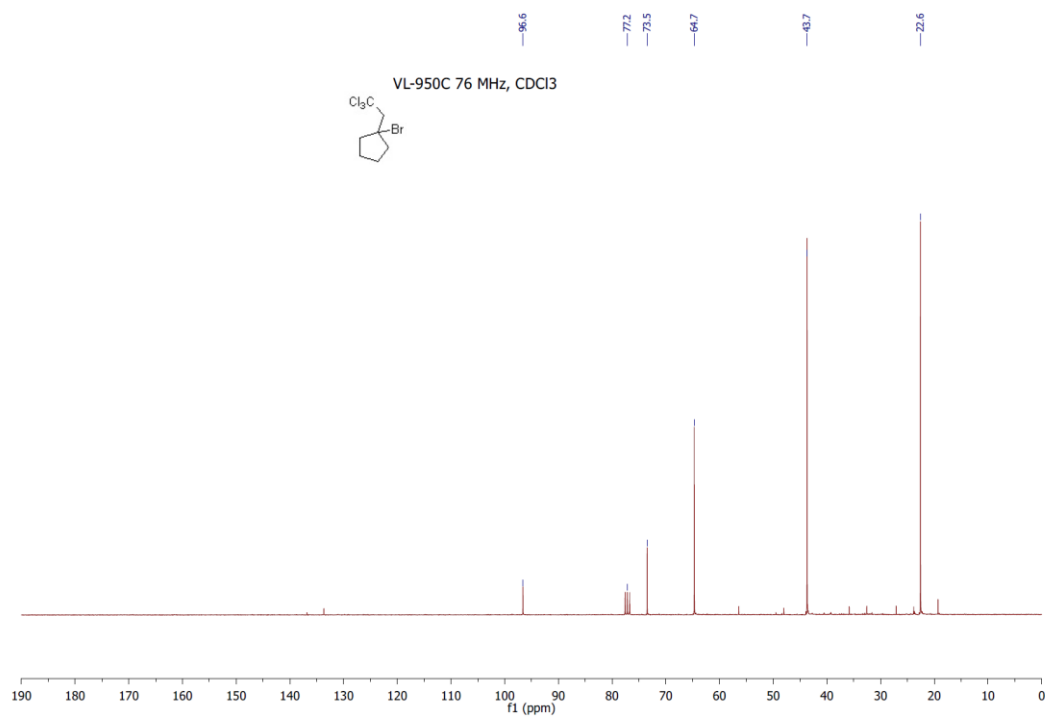

File :D:\DataMS\2017\07-2017\20-07-2017\VL950C.D  
 Operator : VL  
 Acquired : 20 Jul 2017 19:02 using AcqMethod NORMAL.M  
 Instrument : 7890 5975  
 Sample Name: VL950C  
 Misc Info :  
 Vial Number: 15

# Area Percent Report

Data Path : D:\DataMS\2017\07-2017\20-07-2017\  
 Data File : VL950C.D  
 Acq On : 20 Jul 2017 19:02  
 Operator : VL  
 Sample : VL950C  
 Misc :  
 ALS Vial : 15 Sample Multiplier: 1

Integration Parameters: autoint1.e  
 Integrator: ChemStation

Method : C:\msdchem\1\methods\DBWAXconfig\hexadecenal.M  
 Title :

Signal : TIC: VL950C.D\data.ms

| peak # | R.T. min | first scan | max scan | last scan | PK TY | peak height | corr. area | corr. % max. | % of total |
|--------|----------|------------|----------|-----------|-------|-------------|------------|--------------|------------|
| 1      | 5.659    | 374        | 379      | 400       | M     | 1163213     | 14710638   | 100.00%      | 50.845%    |
| 2      | 7.840    | 695        | 700      | 707       | M     | 1332377     | 14221945   | 96.68%       | 49.155%    |

Sum of corrected areas: 28932583

hexadecenal.M Tue Oct 13 11:15:26 2020

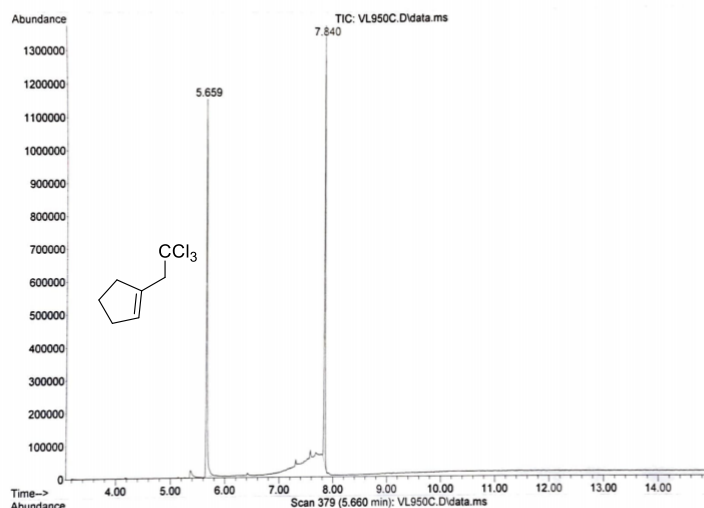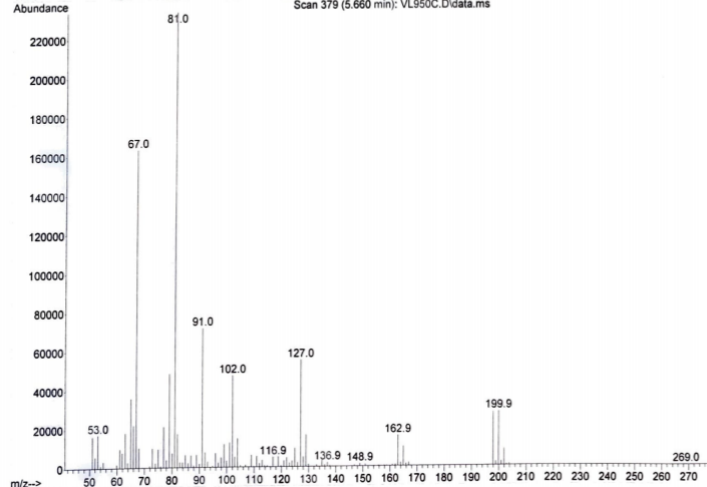

File :D:\DataMS\2017\07-2017\20-07-2017\VL950C.D  
Operator : VL  
Acquired : 20 Jul 2017 19:02 using AcqMethod NORMAL.M  
Instrument : 7890 5975  
Sample Name: VL950C  
Misc Info :  
Vial Number: 15

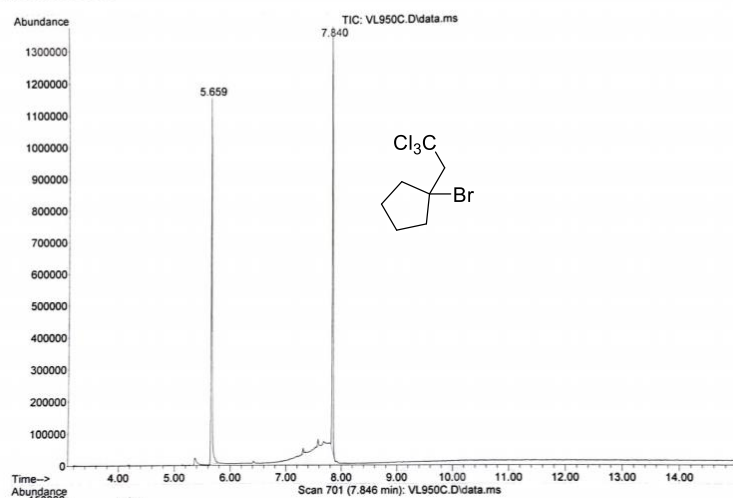

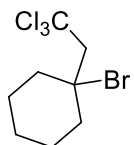

Chemical Formula:  $C_8H_{12}BrCl_3$

Molecular Weight: 294,44

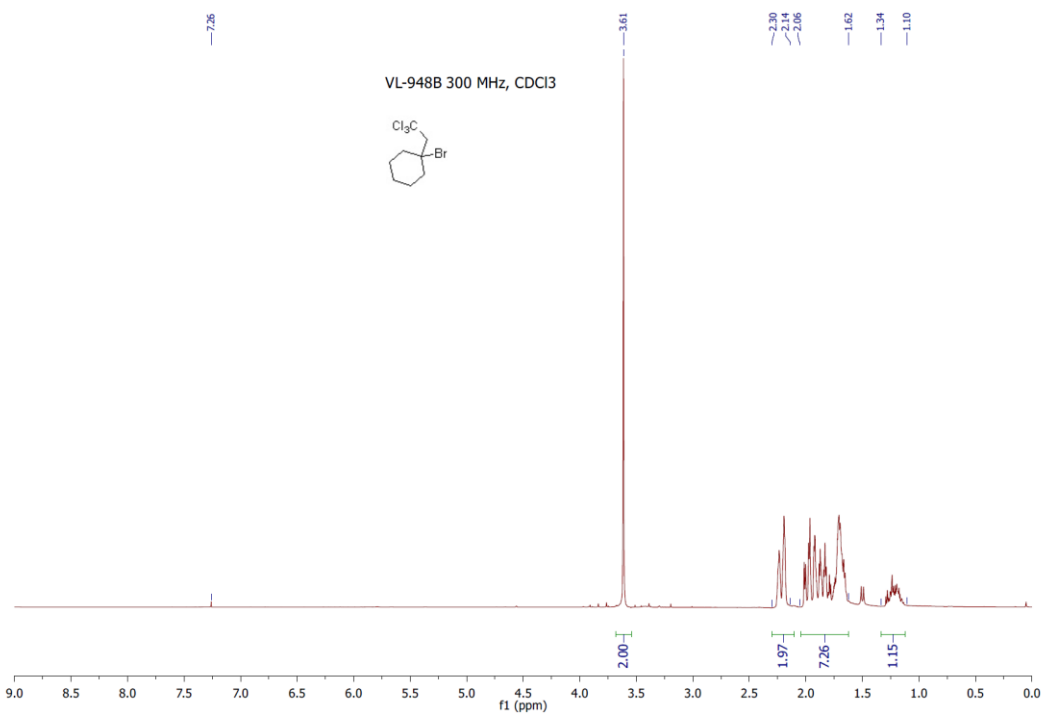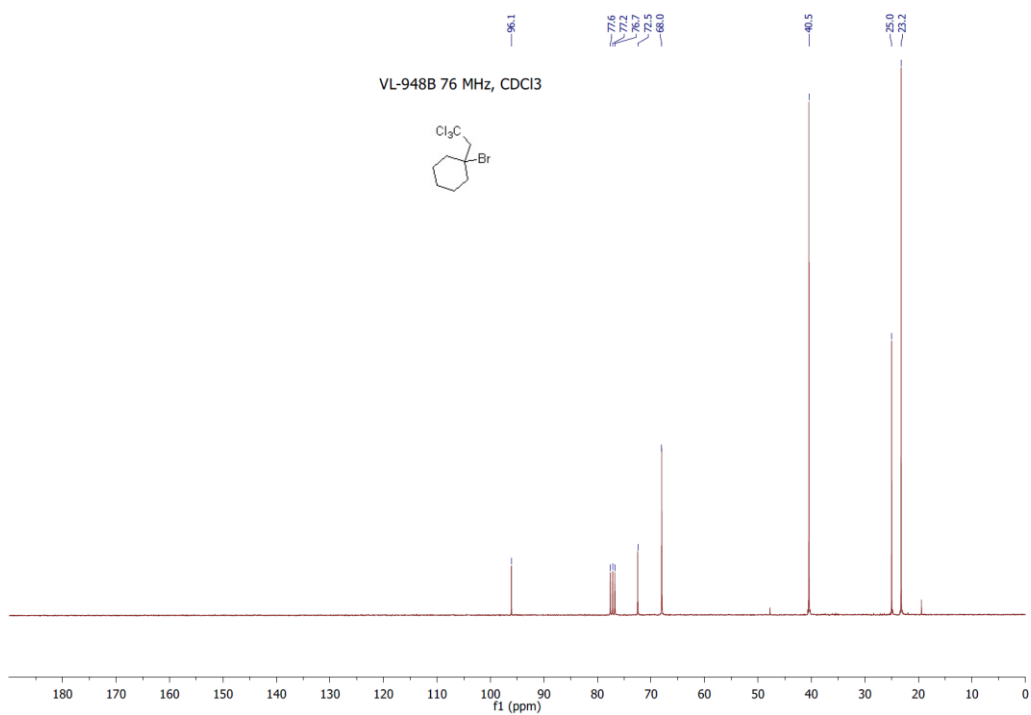



File :D:\DataMS\2017\07-2017\20-07-2017\VL948B.D  
 Operator : VL  
 Acquired : 20 Jul 2017 18:44 using AcqMethod NORMAL.M  
 Instrument : 7890 5975  
 Sample Name: VL948B  
 Misc Info :  
 Vial Number: 14

Area Percent Report

Data Path : D:\DataMS\2017\07-2017\20-07-2017\  
 Data File : VL948B.D  
 Acq On : 20 Jul 2017 18:44  
 Operator : VL  
 Sample : VL948B  
 Misc :  
 ALS Vial : 14 Sample Multiplier: 1  
 Integration Parameters: autoint1.e  
 Integrator: ChemStation  
 Method : C:\msdchem\1\methods\DBWAXconfig\hexadecenal.M  
 Title :

Signal : TIC: VL948B.D\data.ms

| peak # | R.T. min | first scan | max scan | last scan | PK TY | peak height | corr. area | corr. % max. | % of total |
|--------|----------|------------|----------|-----------|-------|-------------|------------|--------------|------------|
| 1      | 6.590    | 512        | 516      | 530       | M     | 307576      | 4332772    | 16.97%       | 8.592%     |
| 2      | 6.819    | 539        | 550      | 569       | M3    | 30517       | 1527652    | 5.98%        | 3.029%     |
| 3      | 7.164    | 570        | 601      | 632       | M2    | 187456      | 19039938   | 74.58%       | 37.755%    |
| 4      | 8.586    | 805        | 810      | 818       | M     | 2384472     | 25530281   | 100.00%      | 50.625%    |

Sum of corrected areas: 50430643

hexadecenal.M Mon Oct 12 17:11:34 2020

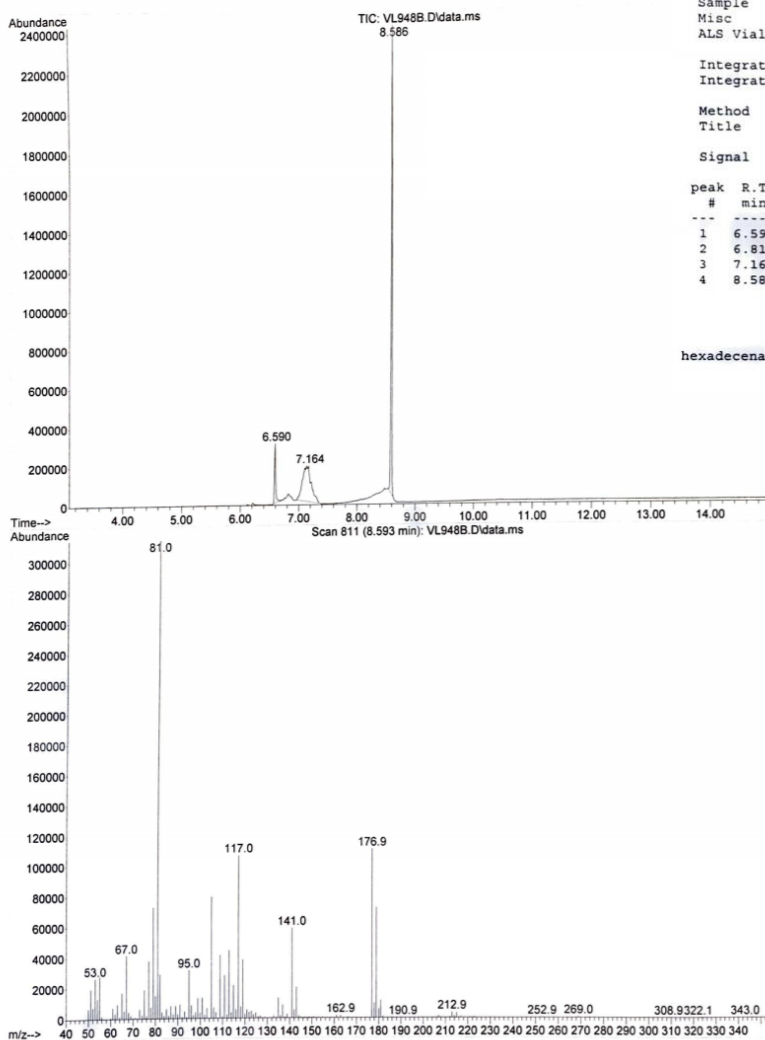

Data CI-200720-VL948B  
 Sample Name:  
 Description:  
 Ionization Mode CI+  
 History Determine m/z[Peak Detect[Centroid,30,Area],Smooth[25]],Correct Base[],Average[MS[1] 9.58.9.59]

Acquired 7/20/2020 10:30:15 AM  
 Operator AccuTof  
 Mass Calibration data CAL-291118-CAL-EI-class4  
 Created 7/20/2020 3:24:36 PM  
 Created by AccuTof

Charge number: 1  
 Element: <sup>12</sup>C: 0 ... 50, <sup>1</sup>H: 0 ... 100, <sup>79</sup>Br: 1 ... 1, <sup>35</sup>Cl: 3 ... 3, <sup>19</sup>F: 0 ... 0, <sup>14</sup>N: 0 ... 0, <sup>16</sup>O: 0 ... 2

Unsaturation Number -1000.0 ... 2000.0 (Fraction Both)

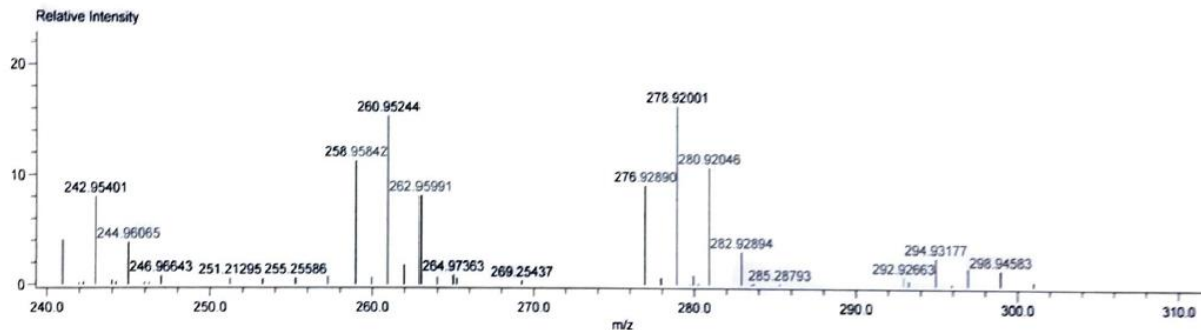

| Mass      | Intensity | Calc. Mass | Mass Difference (ppm) | Possible Formula                                                                                         | Unsaturation Number |
|-----------|-----------|------------|-----------------------|----------------------------------------------------------------------------------------------------------|---------------------|
| 292.92663 | 570.67    | 292.92662  | 0.02                  | <sup>12</sup> C <sub>8</sub> <sup>1</sup> H <sub>13</sub> <sup>79</sup> Br <sup>35</sup> Cl <sub>3</sub> | 0.5                 |

CCl<sub>3</sub>

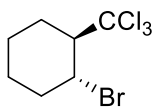

Chemical Formula:  $C_7H_{10}BrCl_3$

Molecular Weight: 280,41

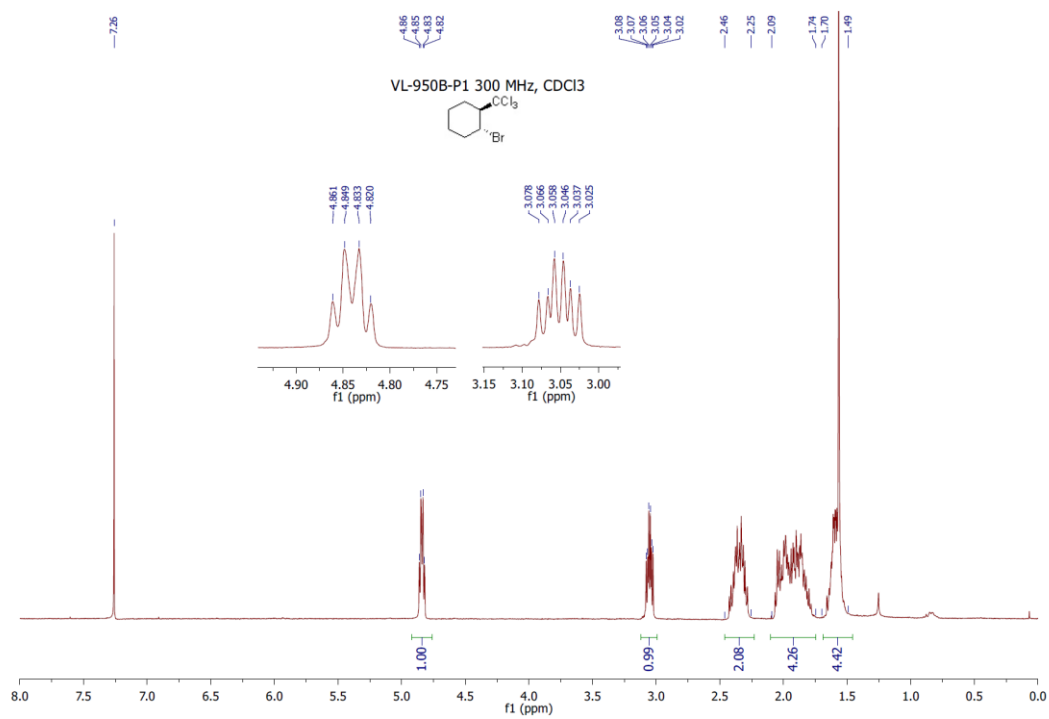

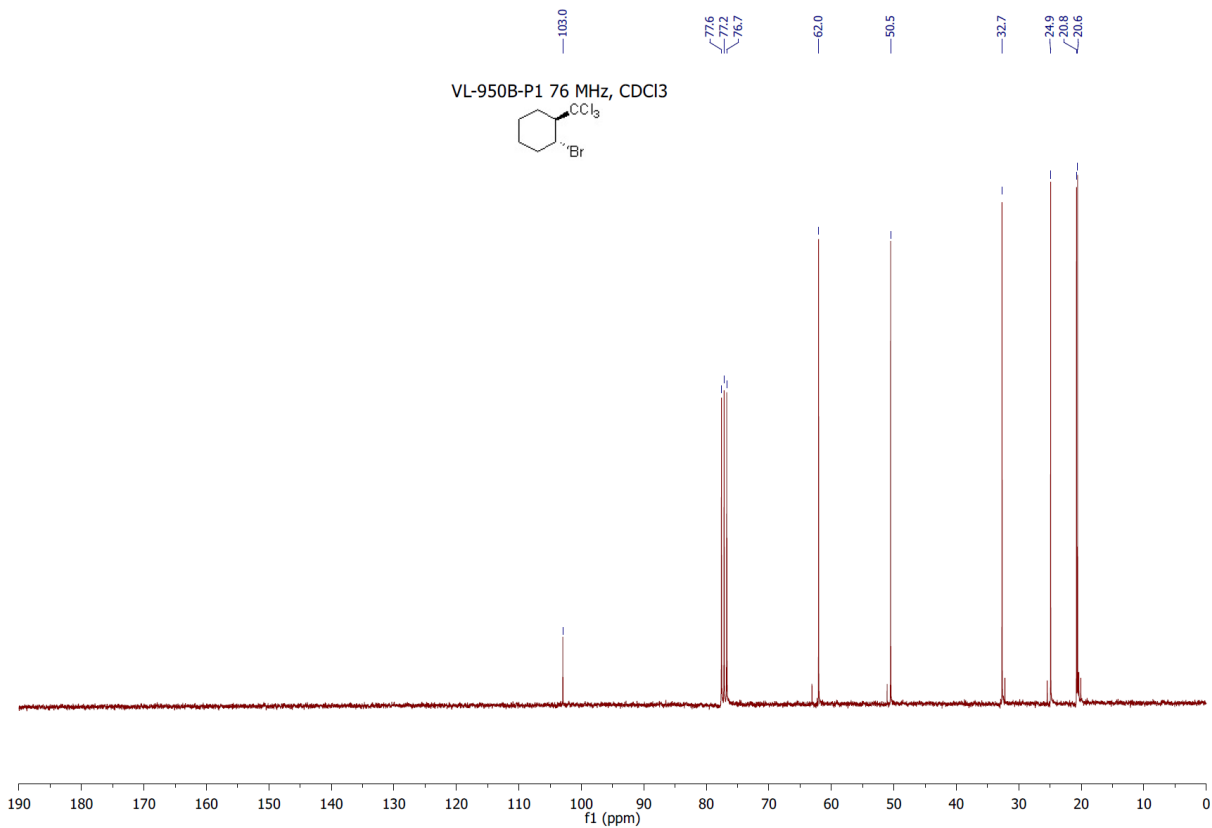

File :D:\DataMS\2017\08-2017\25082017\VL950BP1.D  
 Operator : VL  
 Acquired : 25 Aug 2017 15:12 using AcqMethod NORMAL.M  
 Instrument : 7890 5975  
 Sample Name: VL950BP1  
 Misc Info :  
 Vial Number: 14

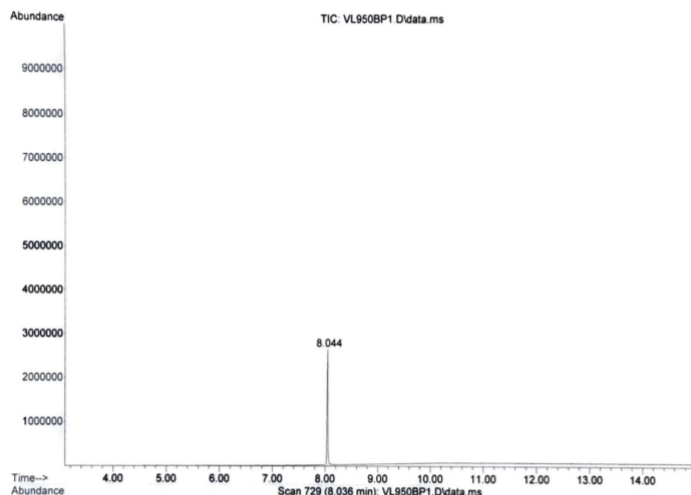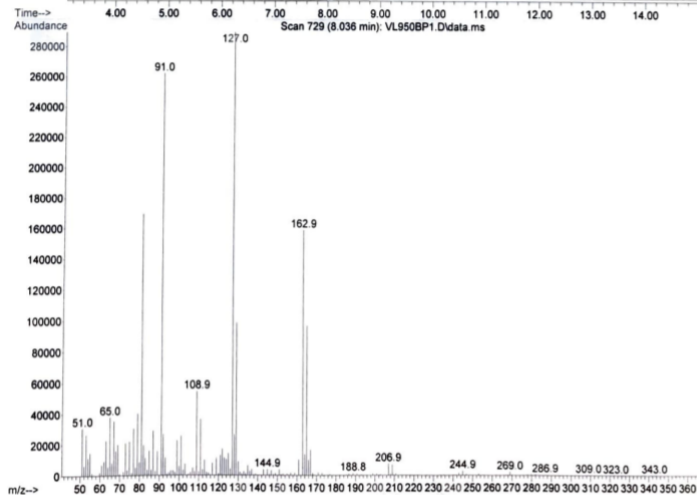

# Area Percent Report

Data Path : D:\DataMS\2017\08-2017\25082017\  
 Data File : VL950BP1.D  
 Acq On : 25 Aug 2017 15:12  
 Operator : VL  
 Sample : VL950BP1  
 Misc :  
 ALS Vial : 14 Sample Multiplier: 1

Integration Parameters: autoint1.e  
 Integrator: ChemStation

Method : C:\msdchem\1\methods\DEWAXconfig\hexadecenal.M  
 Title :

Signal : TIC: VL950BP1.D\data.ms

| peak # | R.T. min | first scan | max scan | last scan | PK TY | peak height | corr. area | corr. % max. | % of total |
|--------|----------|------------|----------|-----------|-------|-------------|------------|--------------|------------|
| 1      | 7.281    | 613        | 618      | 624       | M5    | 8014        | 140883     | 0.45%        | 0.450%     |
| 2      | 8.041    | 725        | 730      | 756       | M     | 2663143     | 31144299   | 100.00%      | 99.550%    |

Sum of corrected areas: 31285183

hexadecenal.M Mon Oct 12 17:00:19 2020

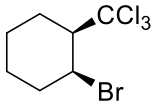

Chemical Formula:  $C_7H_{10}BrCl_3$

Molecular Weight: 280,41

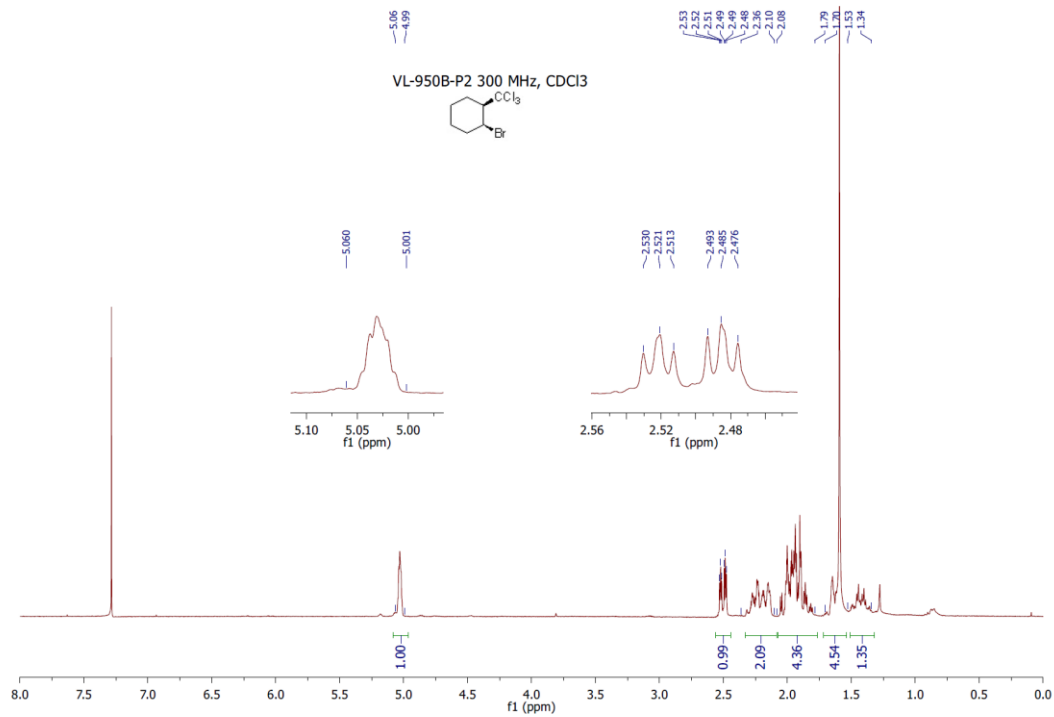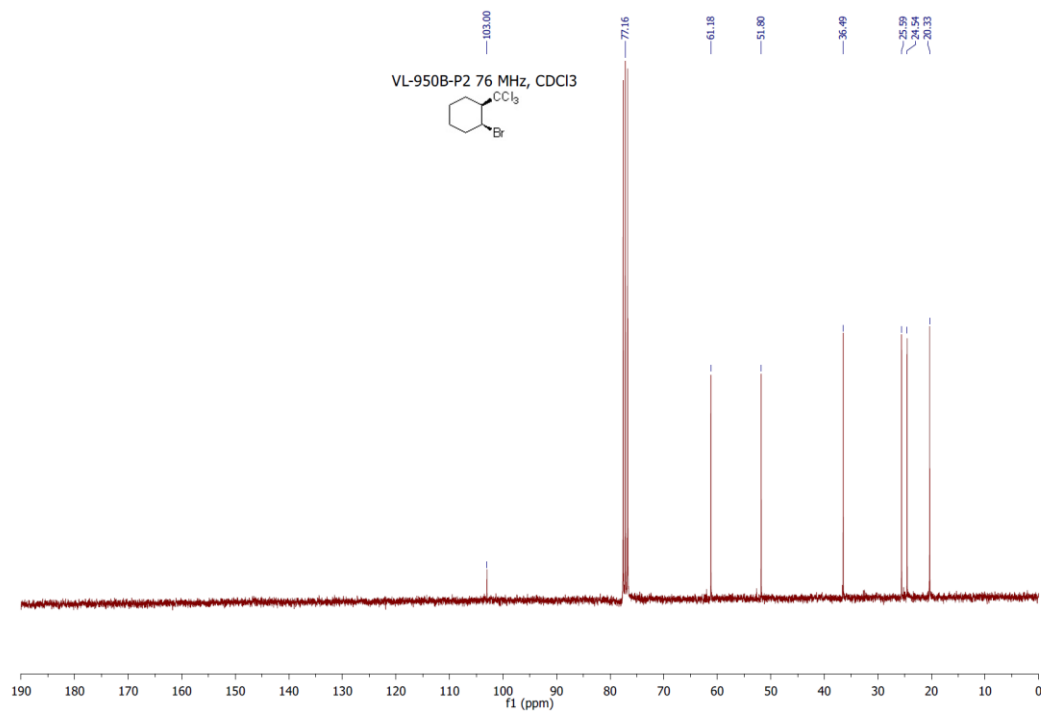

File :D:\DataMS\2017\08-2017\25082017\VL950BP2.D  
 Operator : VL  
 Acquired : 25 Aug 2017 14:54 using AcqMethod NORMAL.M  
 Instrument : 7890 5975  
 Sample Name: VL950BP2  
 Misc Info :  
 Vial Number: 13

# Area Percent Report

Data Path : D:\DataMS\2017\08-2017\25082017\  
 Data File : VL950BP2.D  
 Acq On : 25 Aug 2017 14:54  
 Operator : VL  
 Sample : VL950BP2  
 Misc :  
 ALS Vial : 13 Sample Multiplier: 1

Integration Parameters: autoint1.e  
 Integrator: ChemStation

Method : C:\msdchem\1\methods\DBWAXconfig\hexadecenal.M  
 Title :

Signal : TIC: VL950BP2.D\data.ms

| peak # | R.T. min | first scan | max scan | last scan | PK TY | peak height | corr. area | corr. % max. | % of total |
|--------|----------|------------|----------|-----------|-------|-------------|------------|--------------|------------|
| 1      | 8.049    | 728        | 731      | 735       | M     | 31593       | 389598     | 1.55%        | 1.522%     |
| 2      | 8.436    | 784        | 788      | 802       | M     | 2184454     | 25204725   | 100.00%      | 98.478%    |

Sum of corrected areas: 25594323

hexadecenal.M Mon Oct 12 16:59:44 2020

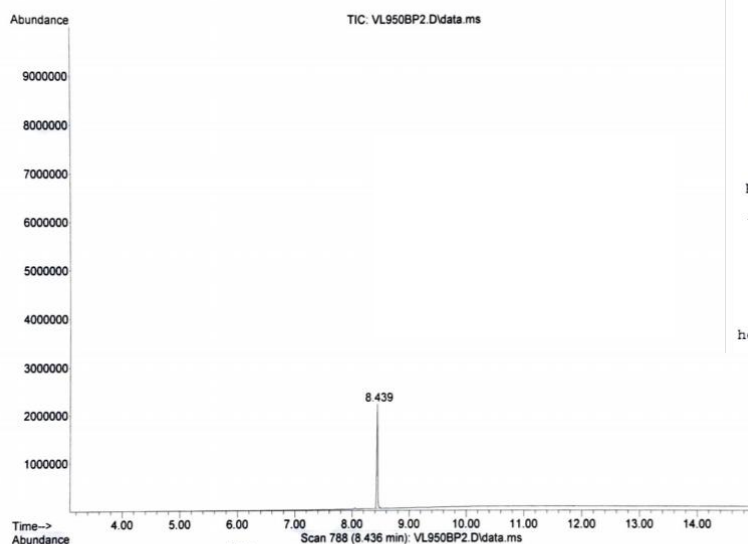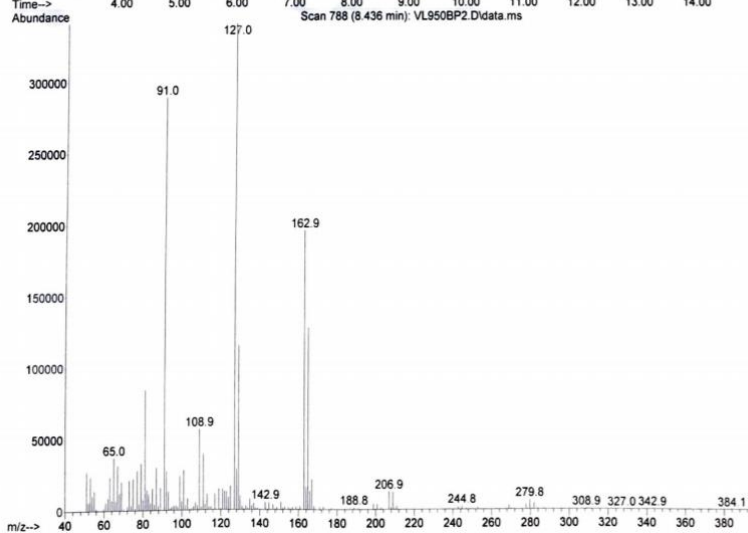

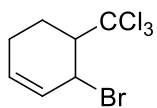

Chemical Formula:  $C_7H_8BrCl_3$

Molecular Weight: 278,40

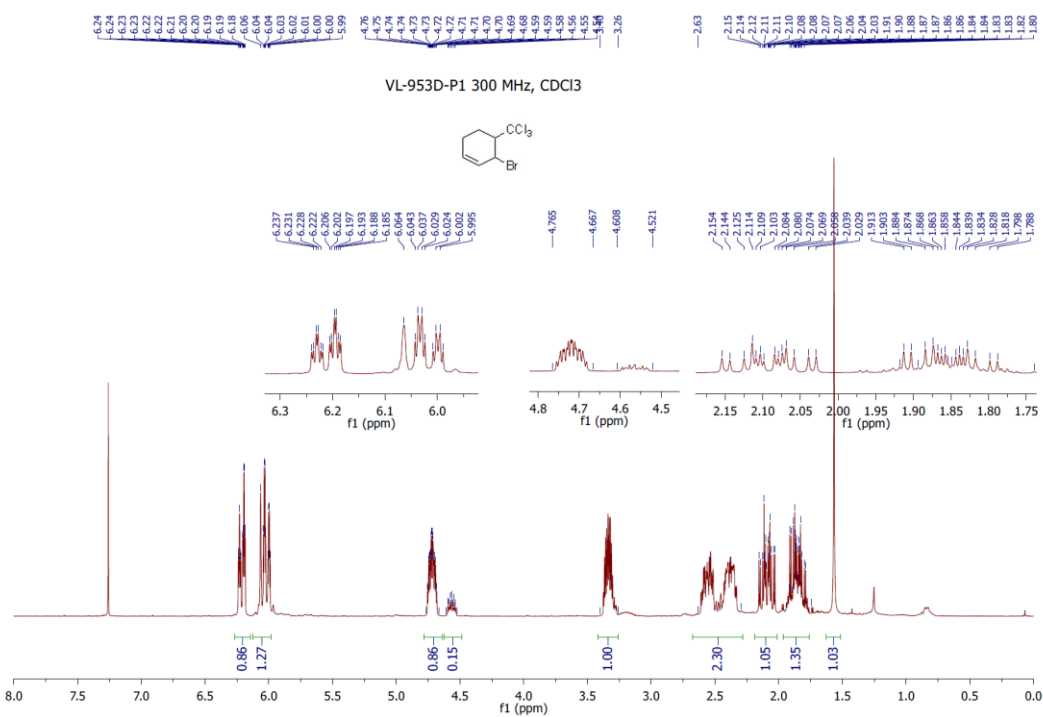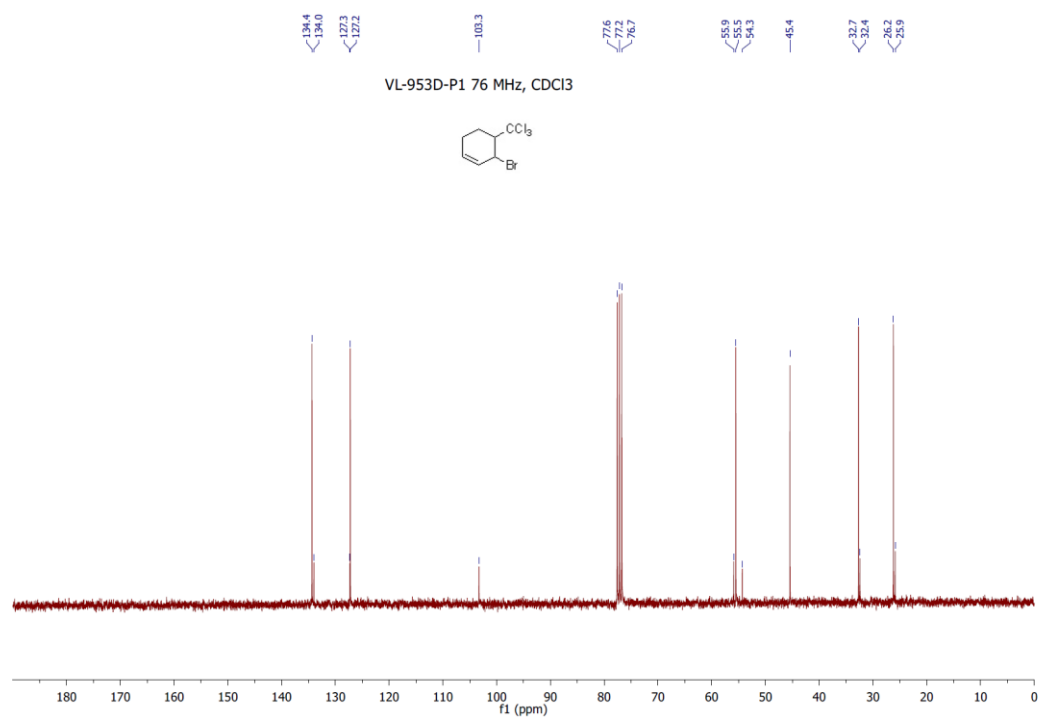

File :D:\DataMS\2017\08-2017\25082017\VL953DP1.D  
 Operator : VL  
 Acquired : 25 Aug 2017 17:21 using AcqMethod NORMAL.M  
 Instrument : 7890 5975  
 Sample Name: VL953DP1  
 Misc Info :  
 Vial Number: 21

Area Percent Report

Data Path : D:\DataMS\2017\08-2017\25082017\  
 Data File : VL953DP1.D  
 Acq On : 25 Aug 2017 17:21  
 Operator : VL  
 Sample : VL953DP1  
 Misc :  
 ALS Vial : 21 Sample Multiplier: 1

Integration Parameters: autoint1.e  
 Integrator: ChemStation

Method : C:\msdchem\1\methods\DBWAXconfig\hexadecenal.M  
 Title :

Signal : TIC: VL953DP1.D\data.ms

| peak<br># | R.T.<br>min | first<br>scan | max<br>scan | last<br>scan | PK<br>TY | peak<br>height | corr.<br>area | corr.<br>% max. | % of<br>total |
|-----------|-------------|---------------|-------------|--------------|----------|----------------|---------------|-----------------|---------------|
| 1         | 5.894       | 410           | 414         | 430          | M        | 15620          | 392649        | 6.29%           | 2.955%        |
| 2         | 7.699       | 676           | 679         | 688          | M        | 158023         | 1954009       | 31.32%          | 14.707%       |
| 3         | 7.898       | 705           | 709         | 714          | M2       | 12979          | 148611        | 2.38%           | 1.119%        |
| 4         | 8.154       | 742           | 746         | 760          | M2       | 56103          | 1084410       | 17.38%          | 8.162%        |
| 5         | 8.367       | 773           | 778         | 785          | M        | 527437         | 6238759       | 100.00%         | 46.955%       |
| 6         | 8.436       | 786           | 788         | 794          | M4       | 13710          | 125477        | 2.01%           | 0.944%        |
| 7         | 8.550       | 796           | 805         | 816          | M        | 227107         | 3342657       | 53.58%          | 25.158%       |

Sum of corrected areas: 13286572

hexadecenal.M Mon Oct 12 16:58:07 2020

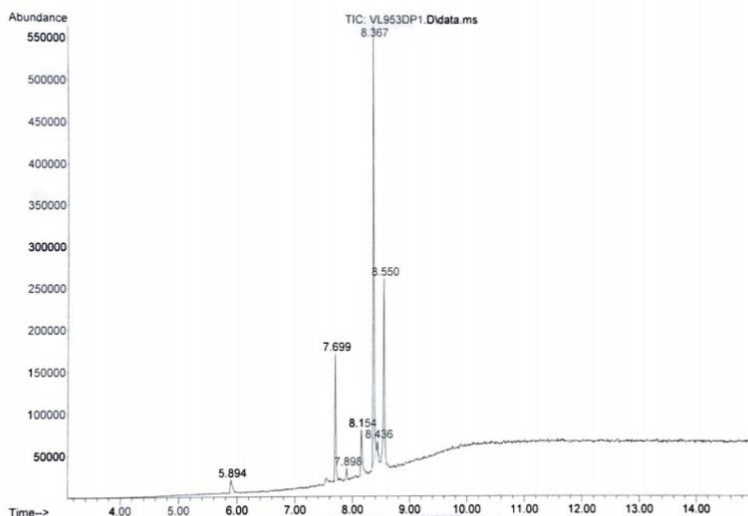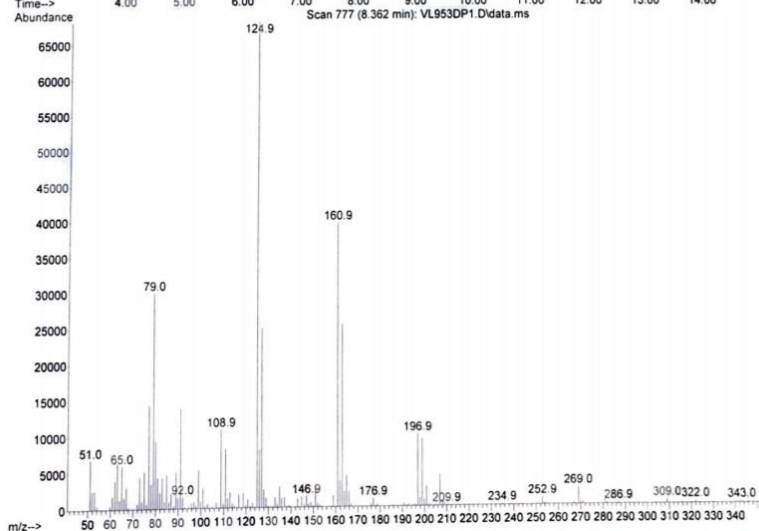



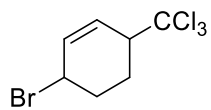

Chemical Formula:  $C_7H_8BrCl_3$

Molecular Weight: 278,40

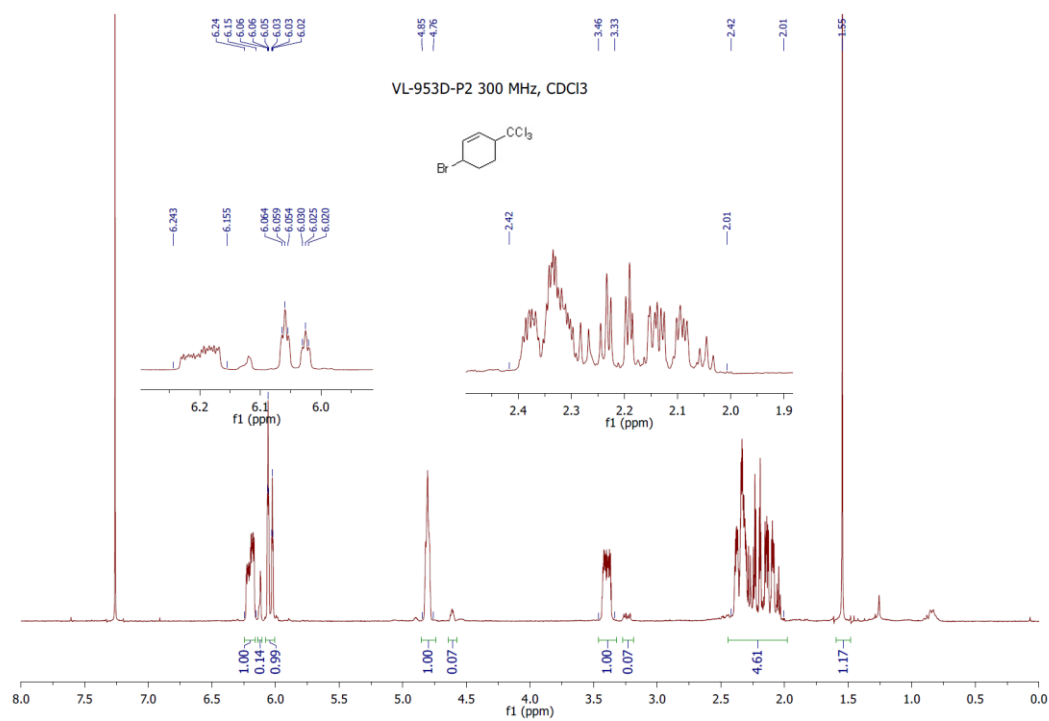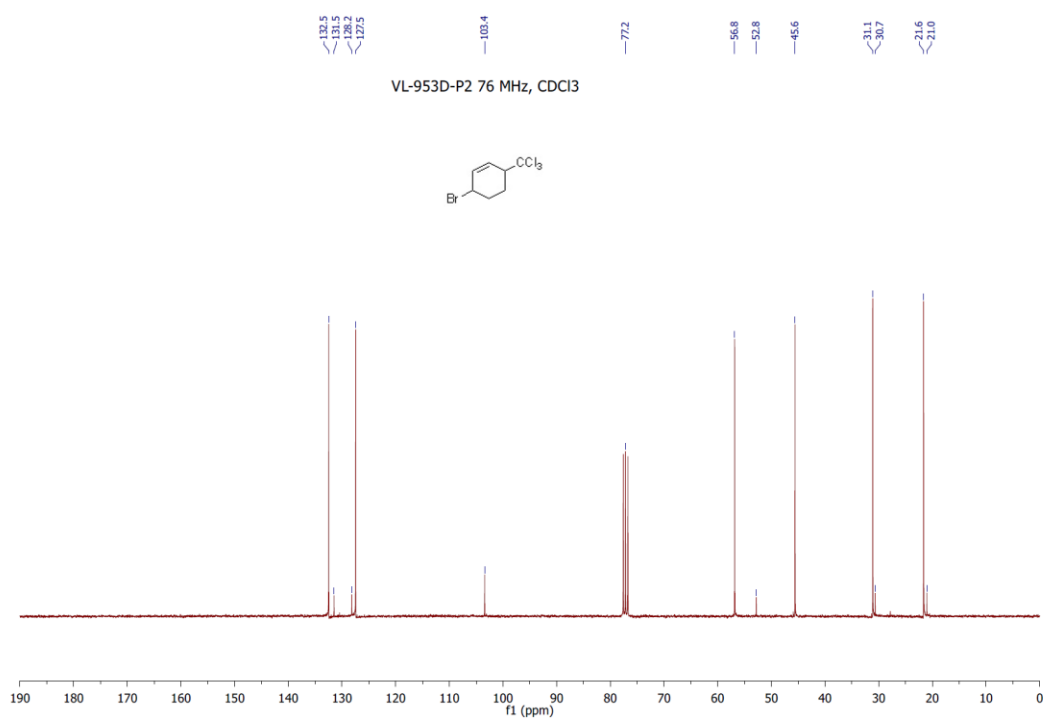

File : D:\DataMS\2017\08-2017\25082017\VL953DP2.D  
 Operator : VL  
 Acquired : 25 Aug 2017 17:03 using AcqMethod NORMAL.M  
 Instrument : 7890 5975  
 Sample Name : VL953DP2  
 Misc Info :  
 Vial Number : 20

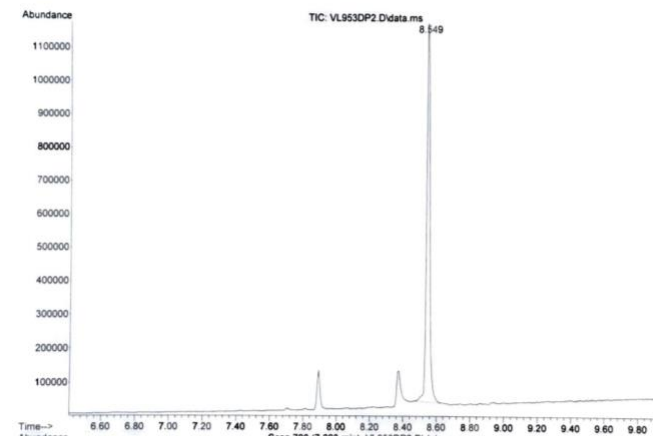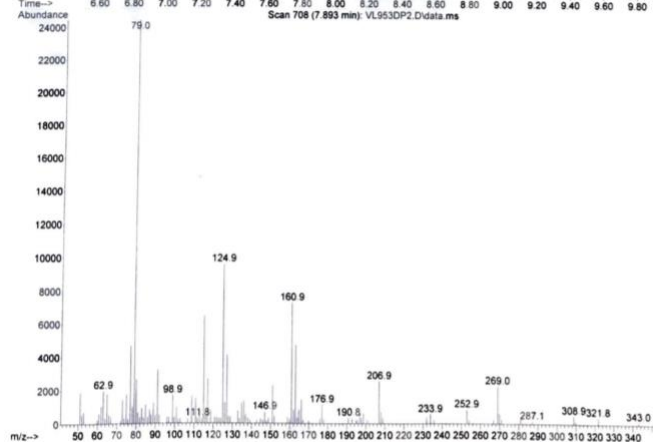

# Area Percent Report

Data Path : D:\DataMS\2017\08-2017\25082017\  
 Data File : VL953DP2.D  
 Acq On : 25 Aug 2017 17:03  
 Operator : VL  
 Sample : VL953DP2  
 Misc :  
 ALS Vial : 20 Sample Multiplier: 1

Integration Parameters: autoint1.e  
 Integrator: ChemStation

Method : C:\msdchem\1\methods\DBWAXconfig\hexadecenal.M  
 Title :

Signal : TIC: VL953DP2.D\data.ms

| peak # | R.T. min | first scan | max scan | last scan | PK TY | peak height | corr. area | corr. % max. | % of total |
|--------|----------|------------|----------|-----------|-------|-------------|------------|--------------|------------|
| 1      | 7.893    | 704        | 708      | 713       | M     | 116687      | 1389076    | 9.16%        | 7.553%     |
| 2      | 8.373    | 775        | 779      | 791       | M     | 105268      | 1838245    | 12.12%       | 9.995%     |
| 3      | 8.546    | 800        | 804      | 815       | M     | 1262993     | 15163731   | 100.00%      | 82.452%    |

Sum of corrected areas: 18391053

hexadecenal.M Mon Oct 12 16:57:09 2020

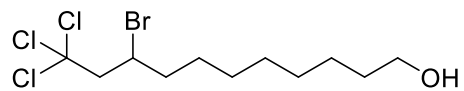

Chemical Formula: C<sub>11</sub>H<sub>20</sub>BrCl<sub>3</sub>O

Molecular Weight: 354,53

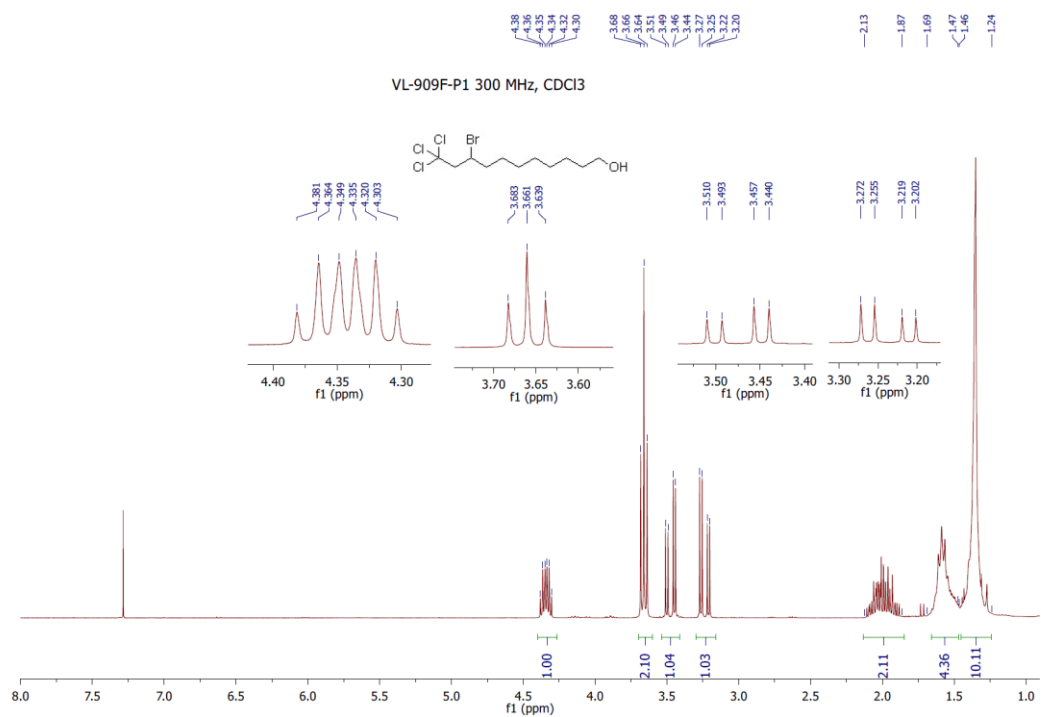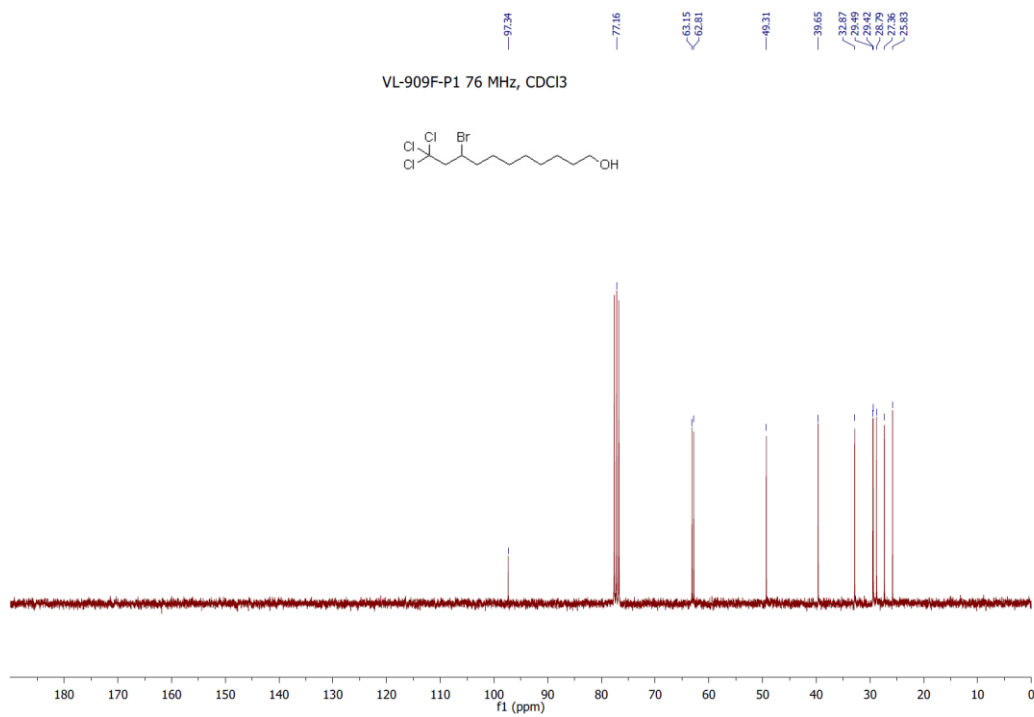

HRMS

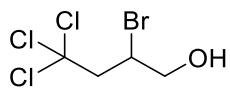

Chemical Formula: C<sub>4</sub>H<sub>6</sub>BrCl<sub>3</sub>O

Molecular Weight: 256,35

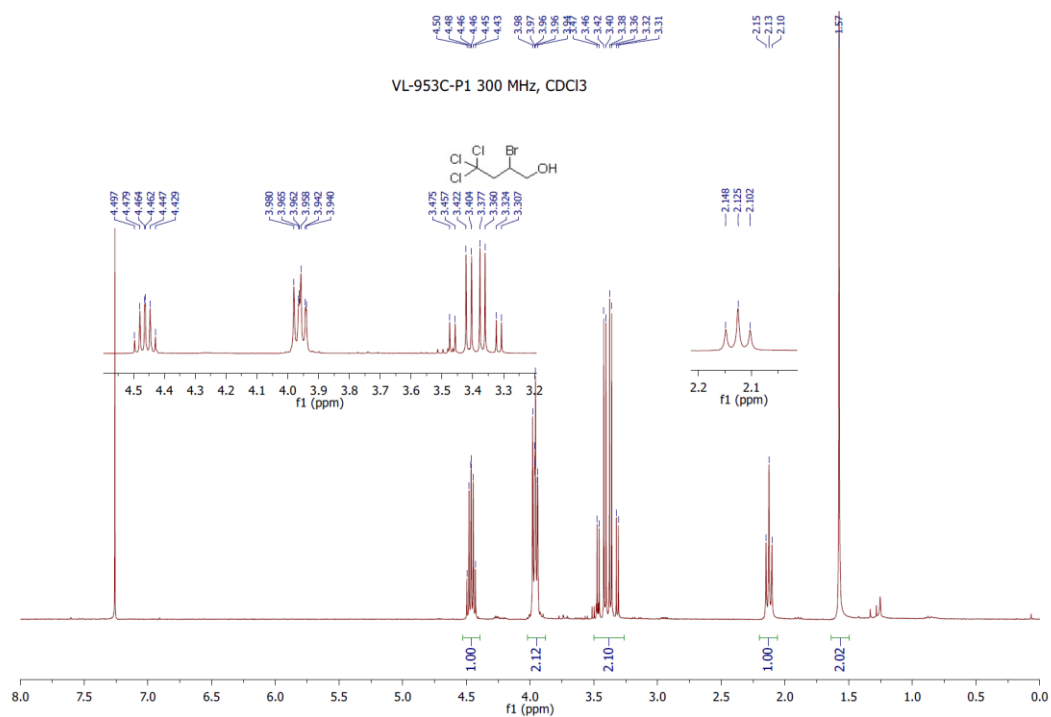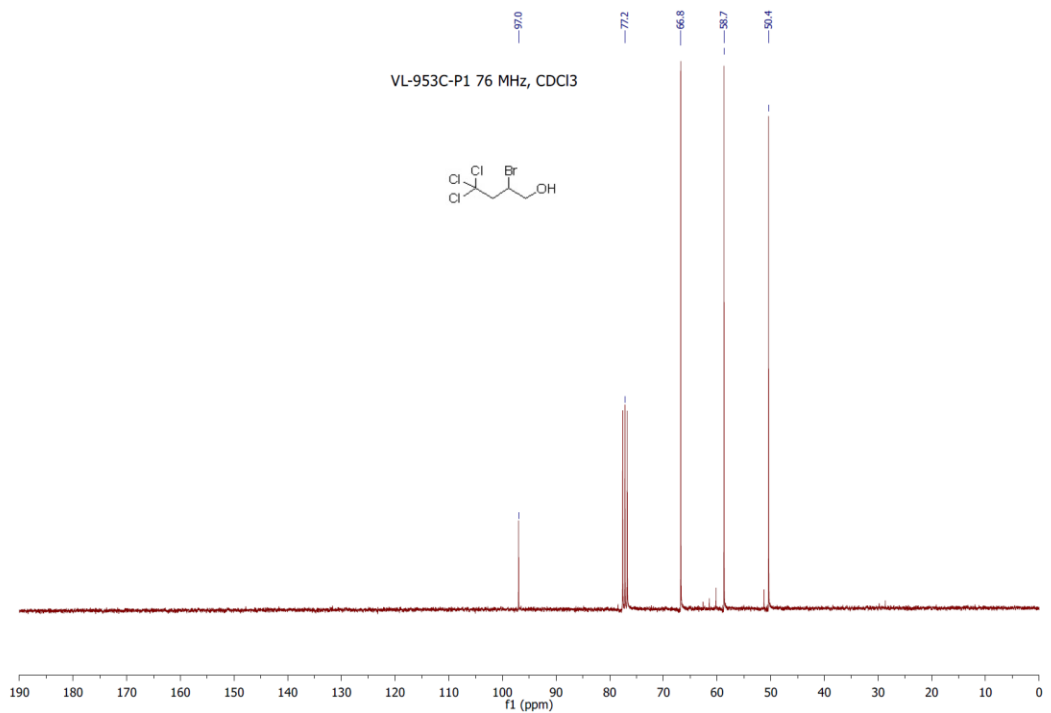

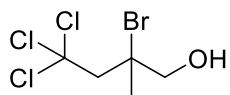

Chemical Formula: C<sub>5</sub>H<sub>8</sub>BrCl<sub>3</sub>O  
Molecular Weight: 270,37

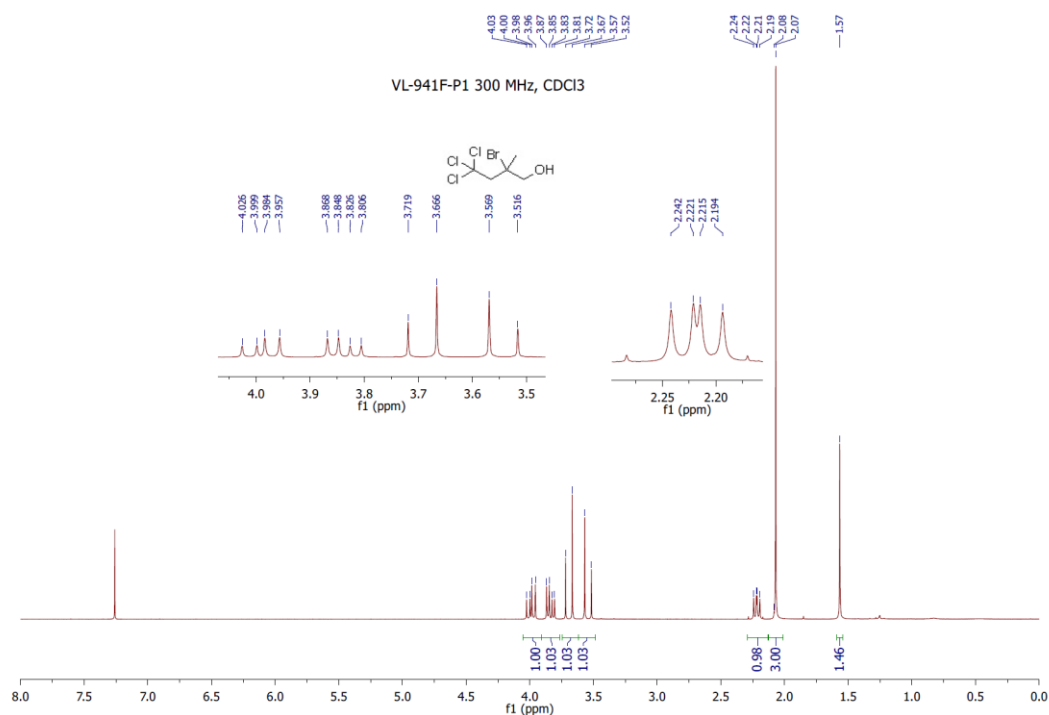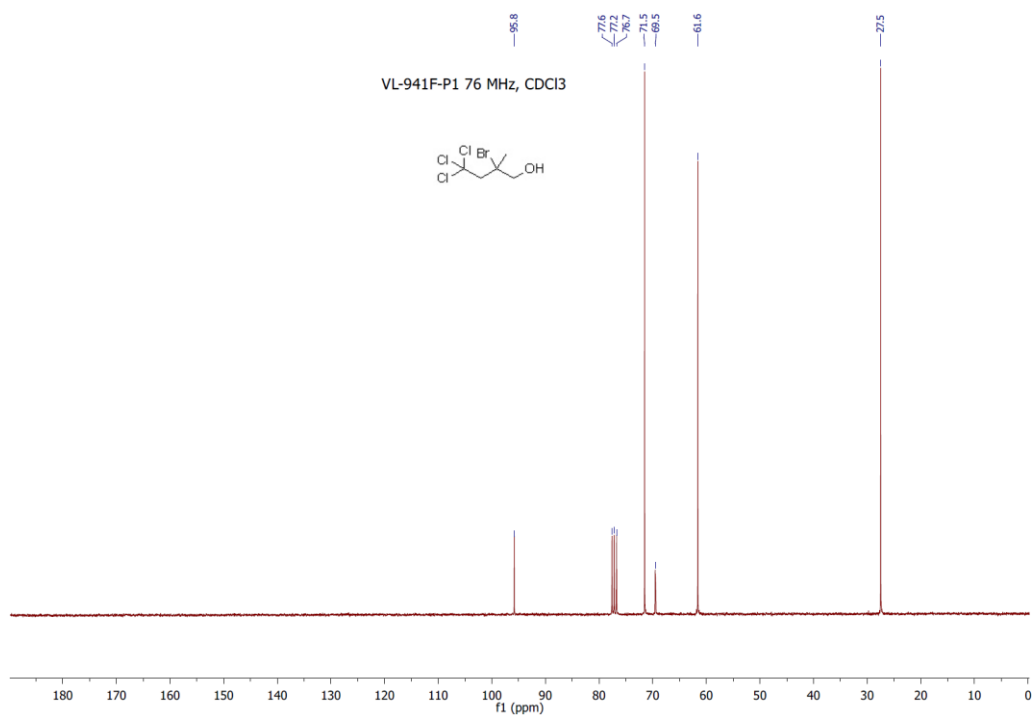

HRMS

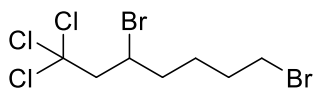

Chemical Formula:  $C_7H_{11}Br_2Cl_3$

Molecular Weight: 361,32

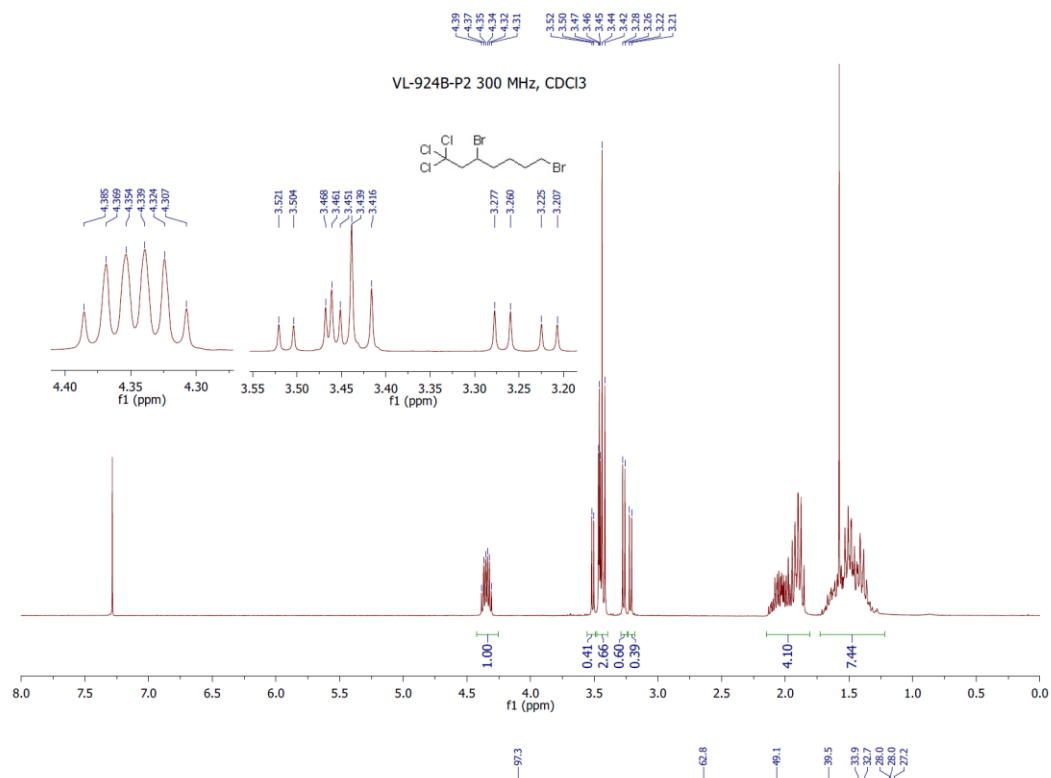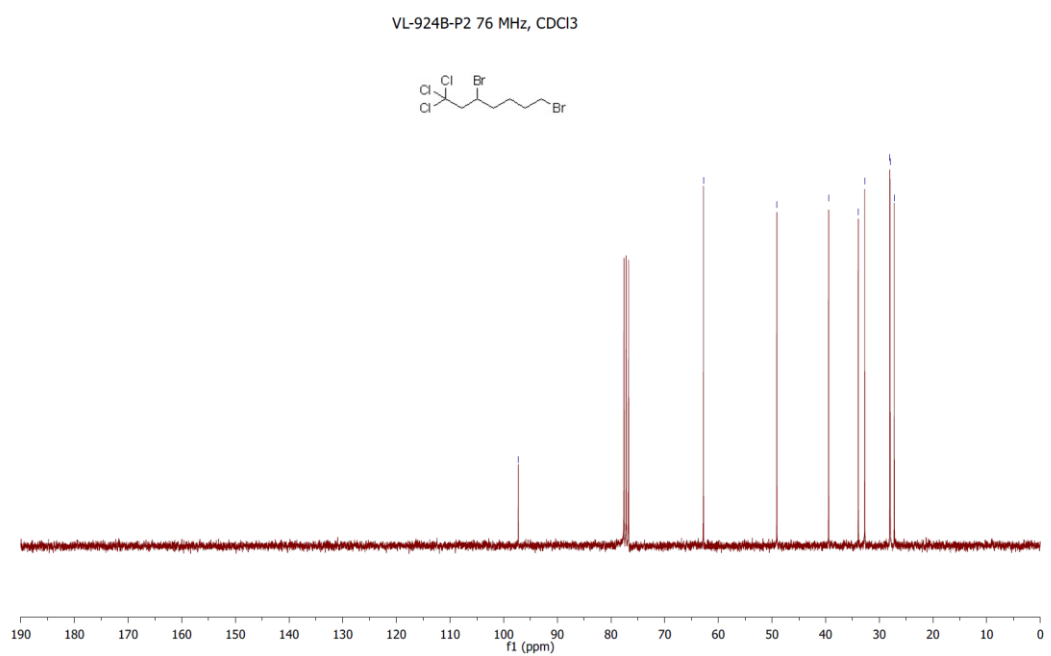

## Area Percent Report

File :D:\DataMS\2017\08-2017\25082017\VL924BP2.D  
Operator : VL  
Acquired : 25 Aug 2017 17:39 using AcqMethod NORMAL.M  
Instrument : 7890 5975  
Sample Name : VL924BP2  
Misc Info :  
Vial Number: 22

Data Path : D:\DataMS\2017\08-2017\25082017\  
Data File : VL924BP2.D  
Acq On : 25 Aug 2017 17:39  
Operator : VL  
Sample : VL924BP2  
Misc :  
ALS Vial : 22 Sample Multiplier: 1

Integration Parameters: autoint1.e  
Integrator: ChemStation

Method : C:\msdchem\1\methods\DBWAXconfig\hexadecenal.M  
Title :

Signal : TIC: VL924BP2.D\data.ms

| peak<br># | R.T.<br>min | first<br>scan | max<br>scan | last<br>scan | PK<br>TY | peak<br>height | corr.<br>area | corr.<br>% max. | % of<br>total |
|-----------|-------------|---------------|-------------|--------------|----------|----------------|---------------|-----------------|---------------|
| 1         | 11.634      | 1252          | 1259        | 1279         | M        | 685219         | 14476579      | 100.00%         | 97.743%       |
| 2         | 13.029      | 1453          | 1465        | 1469         | M        | 11846          | 334290        | 2.31%           | 2.257%        |

Sum of corrected areas: 14810869

hexadecenal.M Mon Oct 12 16:54:26 2020

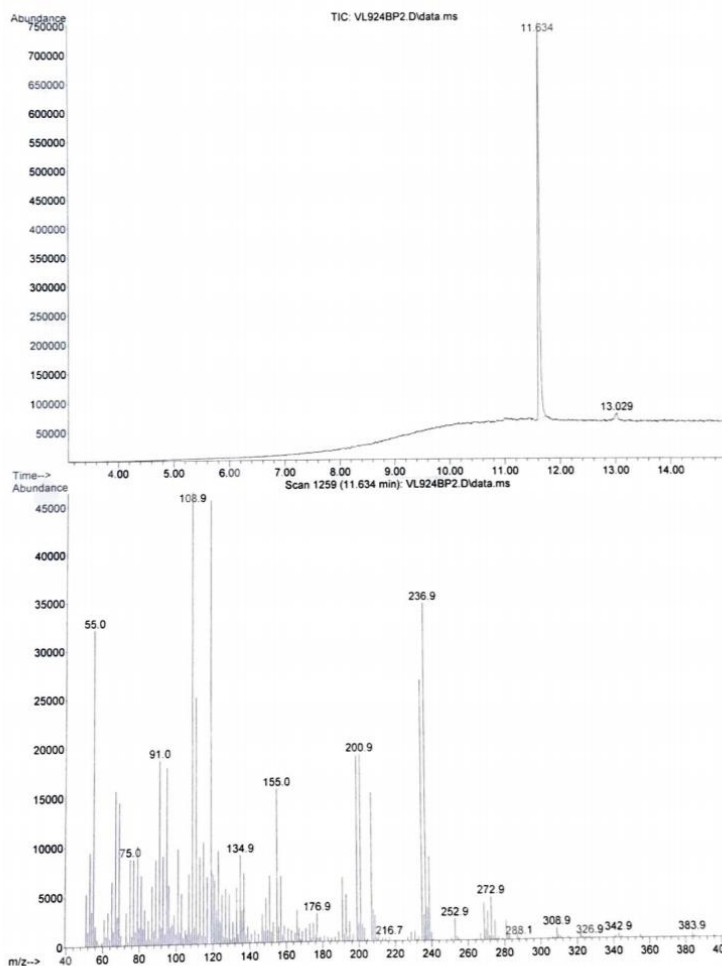

HRMS

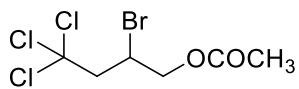

Chemical Formula:  $C_6H_8BrCl_3O_2$

Molecular Weight: 298,38

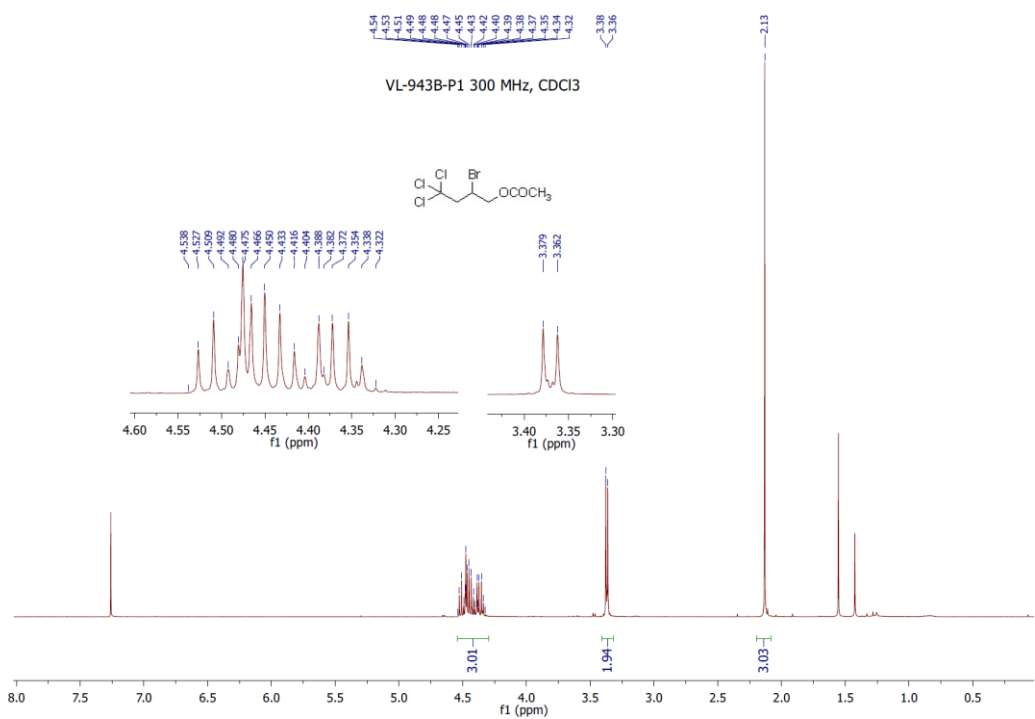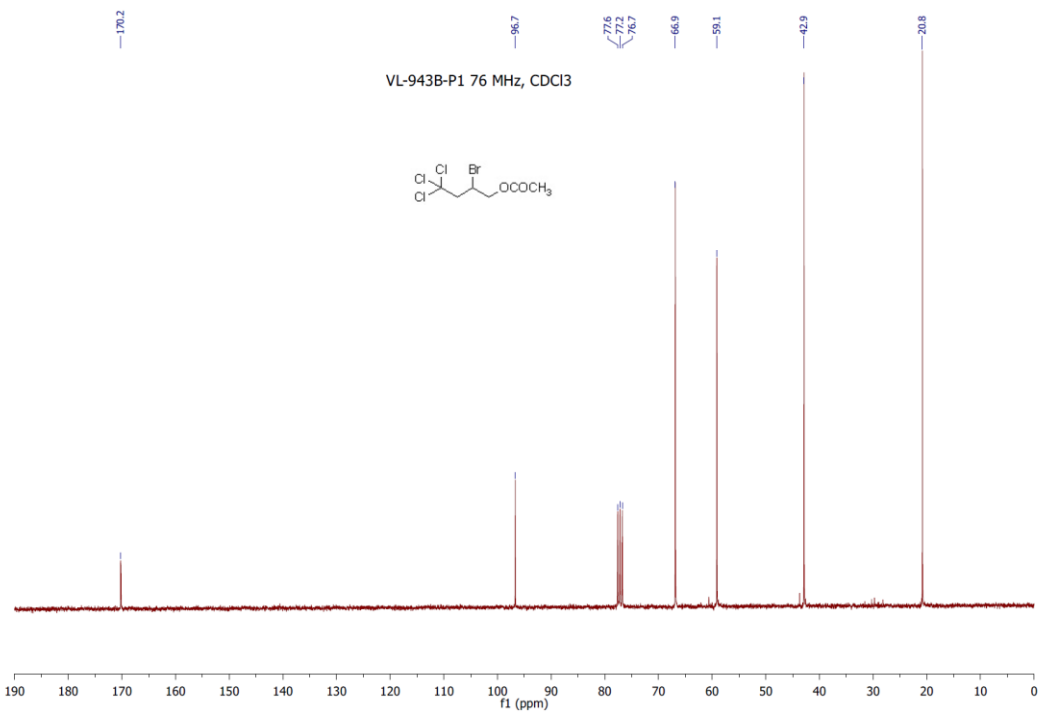



File :D:\DataMS\2017\07-2017\20-07-2017\VL943B-P1.D  
 Operator : VL  
 Acquired : 20 Jul 2017 19:39 using AcqMethod NORMAL.M  
 Instrument : 7890 5975  
 Sample Name: VL943B-P1  
 Misc Info :  
 Vial Number: 17

Area Percent Report

Data Path : D:\DataMS\2017\07-2017\20-07-2017\  
 Data File : VL943B-P1.D  
 Acq On : 20 Jul 2017 19:39  
 Operator : VL  
 Sample : VL943B-P1  
 Misc :  
 ALS Vial : 17 Sample Multiplier: 1

Integration Parameters: autoint1.e  
 Integrator: ChemStation

Method : C:\msdchem\1\methods\DBWAXconfig\hexadecenal.M  
 Title :

Signal : TIC: VL943B-P1.D\data.ms

| peak<br># | R.T.<br>min | first<br>scan | max<br>scan | last<br>scan | PK<br>TY | peak<br>height | corr.<br>area | corr.<br>% max. | % of<br>total |
|-----------|-------------|---------------|-------------|--------------|----------|----------------|---------------|-----------------|---------------|
| 1         | 7.811       | 691           | 696         | 711          | M        | 2783608        | 34494690      | 100.00%         | 99.295%       |
| 2         | 7.962       | 715           | 718         | 721          | M2       | 20191          | 244945        | 0.71%           | 0.705%        |

Sum of corrected areas: 34739635

hexadecenal.M Mon Oct 12 17:09:49 2020

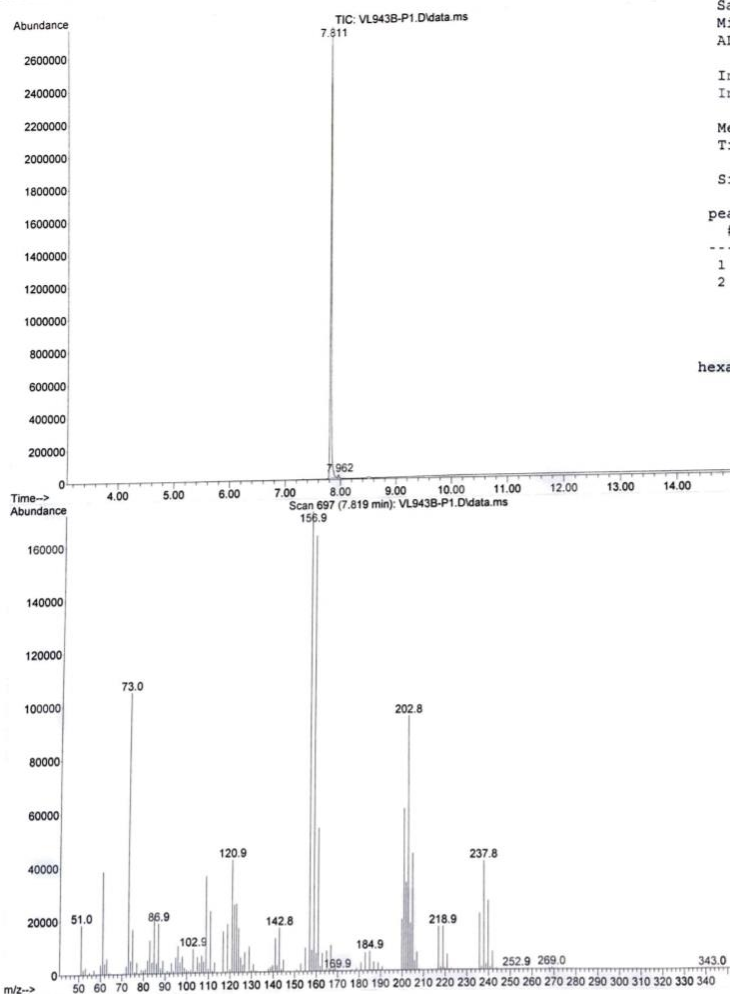

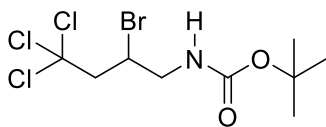

Chemical Formula:  $C_9H_{15}BrCl_3NO_2$

Molecular Weight: 355,48

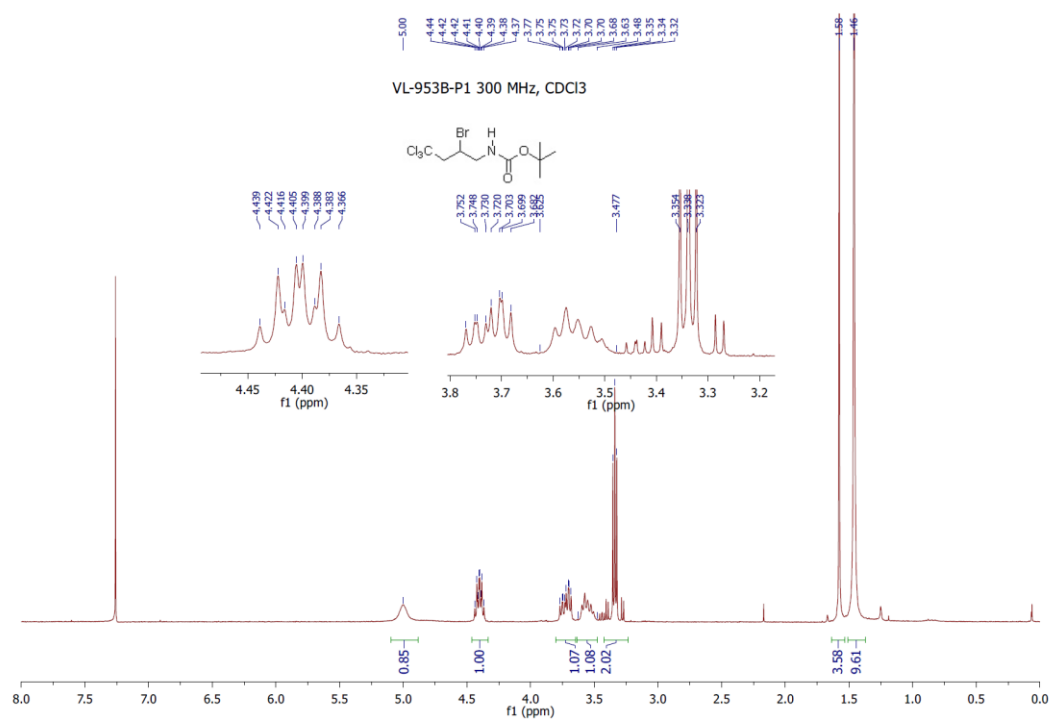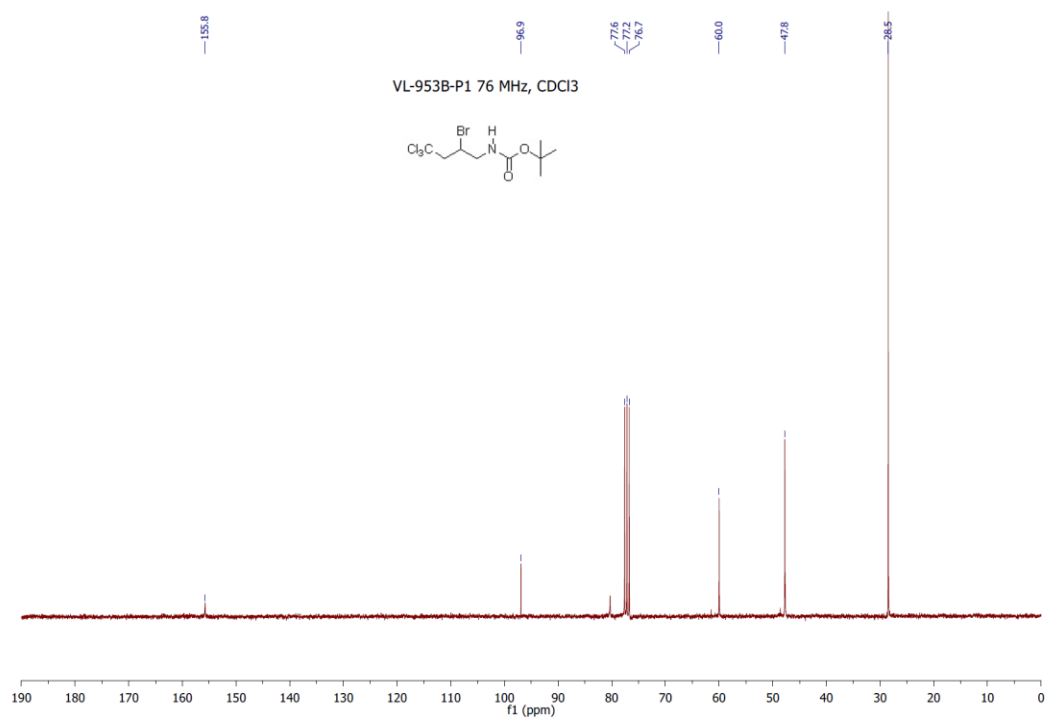

File :D:\DataMS\2017\08-2017\25082017\VL953BP1.D  
 Operator : VL  
 Acquired : 25 Aug 2017 17:58 using AcqMethod NORMAL.M  
 Instrument : 7890 5975  
 Sample Name: VL953BP1  
 Misc Info :  
 Vial Number: 23

# Area Percent Report

Data Path : D:\DataMS\2017\08-2017\25082017\  
 Data File : VL953BP1.D  
 Acq On : 25 Aug 2017 17:58  
 Operator : VL  
 Sample : VL953BP1  
 Misc :  
 ALS Vial : 23 Sample Multiplier: 1

Integration Parameters: autoint1.e  
 Integrator: ChemStation

Method : C:\msdchem\1\methods\DBWAXconfig\hexadecenal.M  
 Title :

Signal : TIC: VL953BP1.D\data.ms

| peak # | R.T.   | first min | max scan | last scan | PK TY | peak height | corr. area | corr. % max. | % of total |
|--------|--------|-----------|----------|-----------|-------|-------------|------------|--------------|------------|
| 1      | 10.160 | 1036      | 1042     | 1055      | M     | 223039      | 3692113    | 100.00%      | 100.000%   |

Sum of corrected areas: 3692113

hexadecenal.M Mon Oct 12 17:12:28 2020

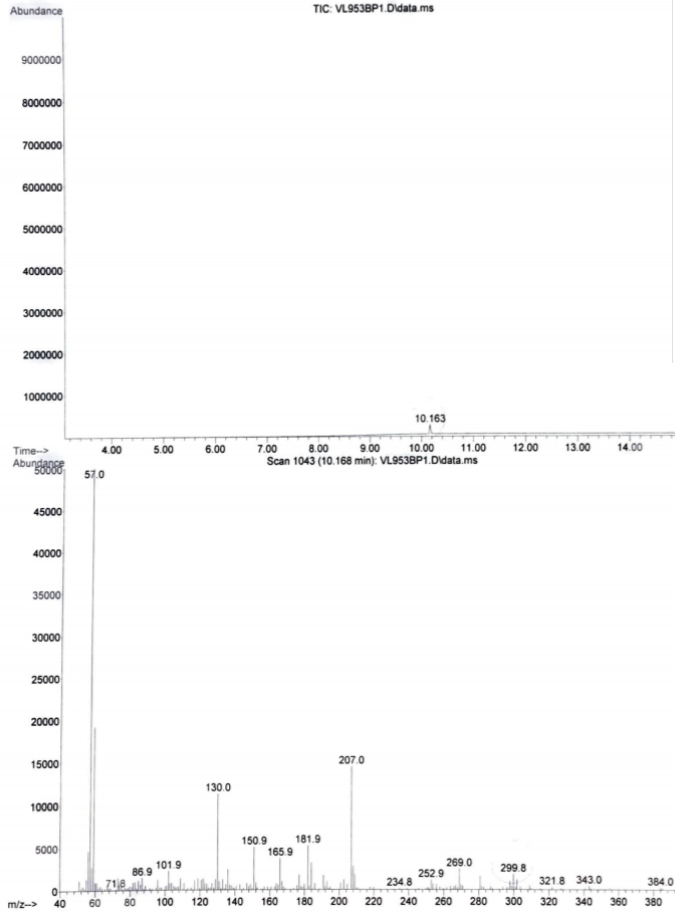

Data CI-240620-VL953BP  
 Sample Name:  
 Description:  
 Ionization Mode:CI+  
 History: Determine m/z[Peak Detect[Centroid,30,Area]].Correct Base[.Average(MS[1] 10.62..10.66)

Acquired 6/24/2020 2:05:32 PM  
 Operator:AccuTof  
 Mass Calibration data:CAL-291118-CAL-EI-class4  
 Created 6/24/2020 5:43:27 PM  
 Created by:AccuTof

Charge number:1  
 Element:<sup>12</sup>C:0..50, <sup>1</sup>H:0..100, <sup>81</sup>Br:1..1, <sup>35</sup>Cl:3..3, <sup>14</sup>N:1..1, <sup>16</sup>O:0..2  
 Tolerance:50.00(ppm)

Unsaturation Number:-1000.0..2000.0 (Fraction:Both)

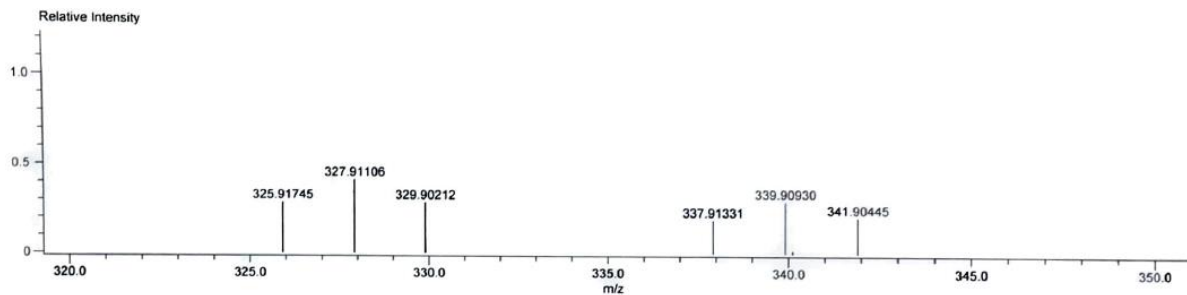

| Mass      | Intensity | Calc. Mass | Mass Difference (ppm) | Possible Formula                                                                                                                                                                | Unsaturation Number |
|-----------|-----------|------------|-----------------------|---------------------------------------------------------------------------------------------------------------------------------------------------------------------------------|---------------------|
| 339.90930 | 666.56    | 339.90965  | -1.03                 | <sup>12</sup> C <sub>8</sub> <sup>1</sup> H <sub>12</sub> <sup>81</sup> Br <sub>1</sub> <sup>35</sup> Cl <sub>3</sub> <sup>14</sup> N <sub>1</sub> <sup>16</sup> O <sub>2</sub> | 1.5                 |

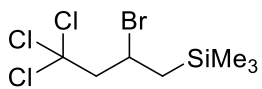

Chemical Formula: C<sub>7</sub>H<sub>14</sub>BrCl<sub>3</sub>Si

Molecular Weight: 312,53

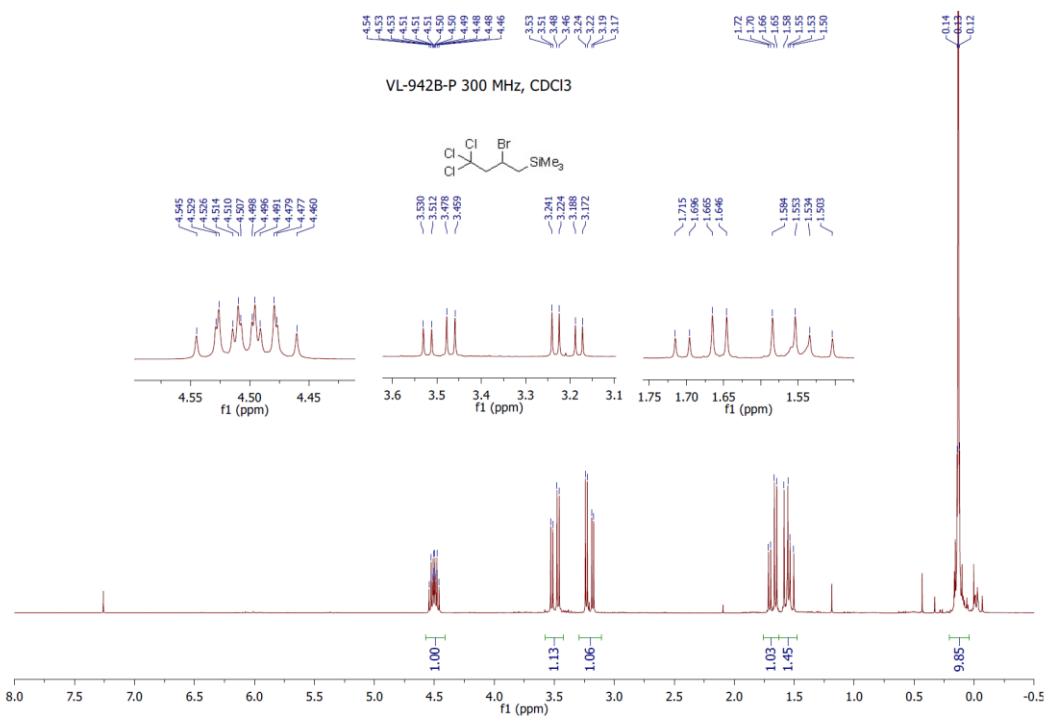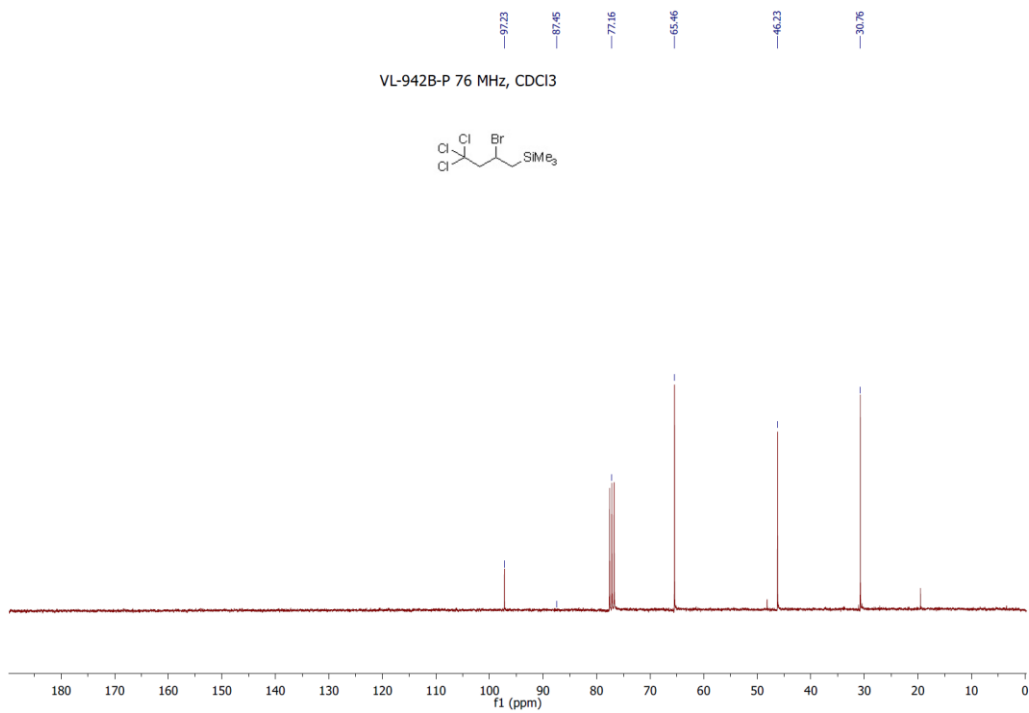

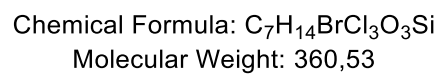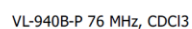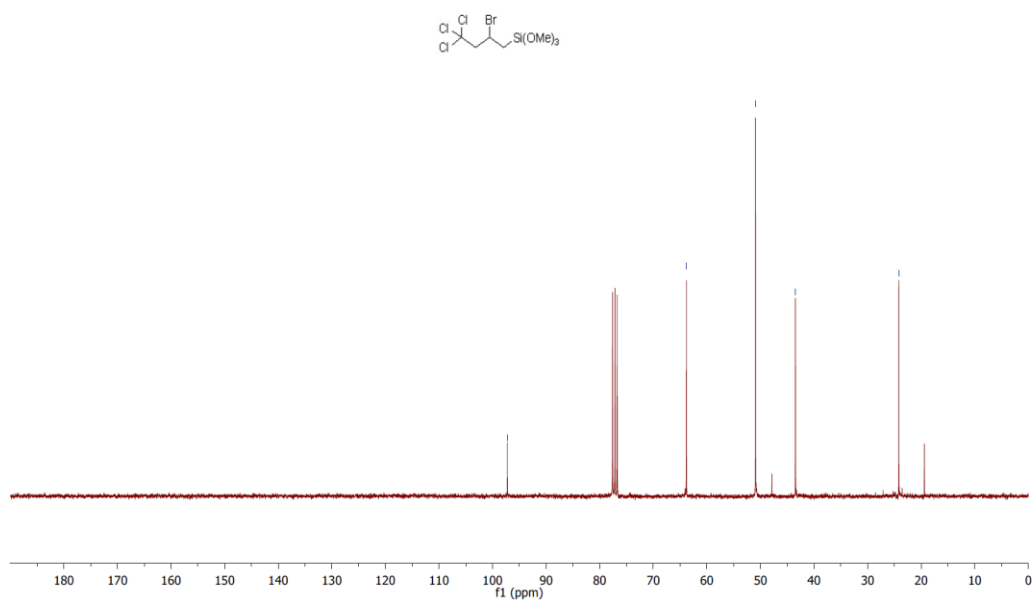

HRMS

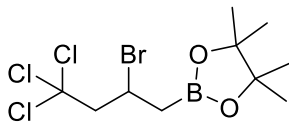

Chemical Formula:  $C_{10}H_{17}BBBrCl_3O_2$

Molecular Weight: 366,31

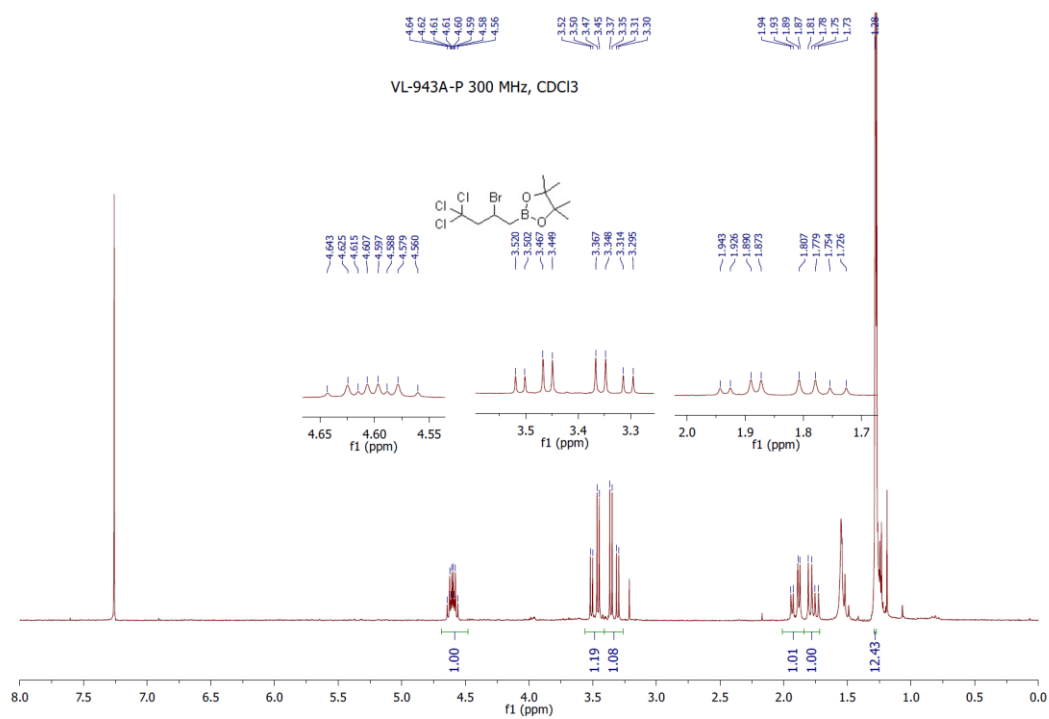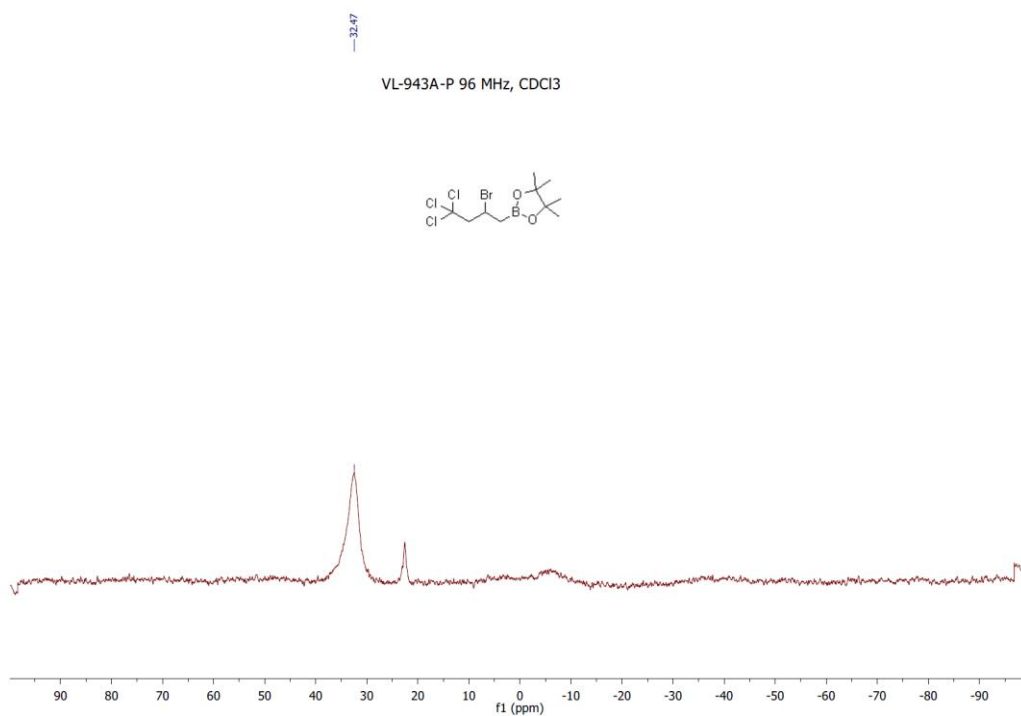

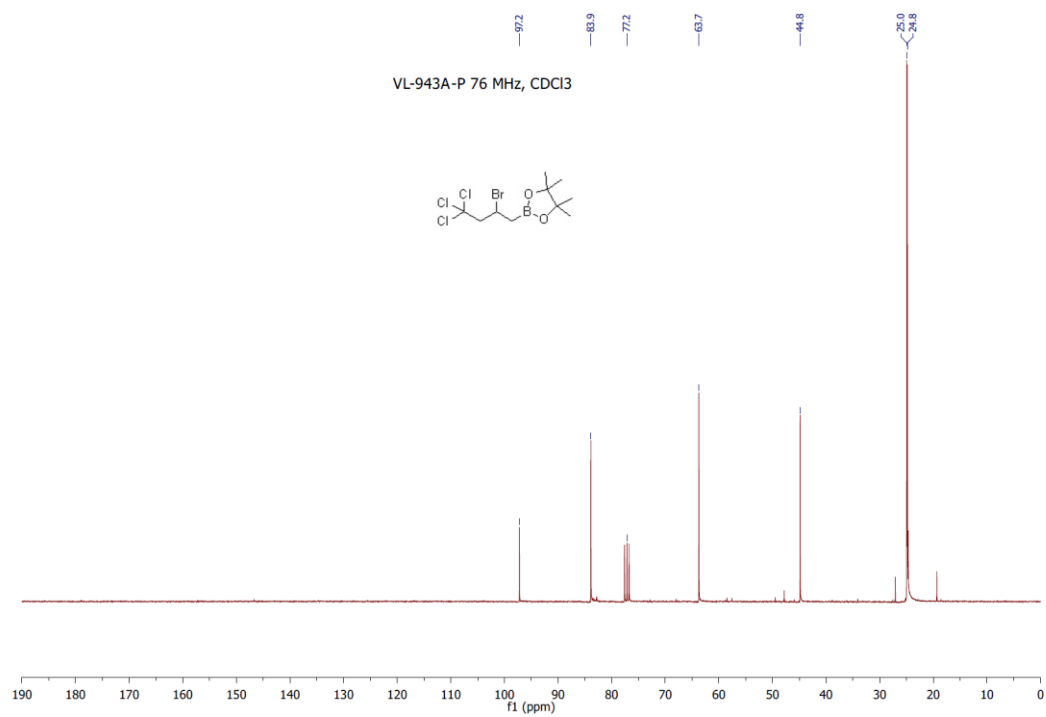

File :D:\DataMS\2017\07-2017\20-07-2017\VL943A.D  
 Operator : VL  
 Acquired : 20 Jul 2017 21:10 using AcqMethod NORMAL.M  
 Instrument : 7890 5975  
 Sample Name: VL943A  
 Misc Info :  
 Vial Number: 22

# Area Percent Report

Data Path : D:\DataMS\2017\07-2017\20-07-2017\  
 Data File : VL943A.D  
 Acq On : 20 Jul 2017 21:10  
 Operator : VL  
 Sample : VL943A  
 Misc :  
 ALS Vial : 22 Sample Multiplier: 1

Integration Parameters: autoint1.e  
 Integrator: ChemStation

Method : C:\msdchem\1\methods\DBWAXconfig\hexadecenal.M  
 Title :

Signal : TIC: VL943A.D\data.ms

| peak # | R.T. min | first scan | max scan | last scan | PK TY | peak height | corr. area | corr. % max. | % of total |
|--------|----------|------------|----------|-----------|-------|-------------|------------|--------------|------------|
| 1      | 8.513    | 797        | 799      | 803       | M     | 160633      | 1457192    | 2.29%        | 2.183%     |
| 2      | 9.289    | 909        | 914      | 919       | M     | 5985358     | 63679568   | 100.00%      | 95.387%    |
| 3      | 9.393    | 926        | 929      | 933       | M     | 153844      | 1622065    | 2.55%        | 2.430%     |

Sum of corrected areas: 66758825

hexadecenal.M Mon Oct 12 17:13:09 2020

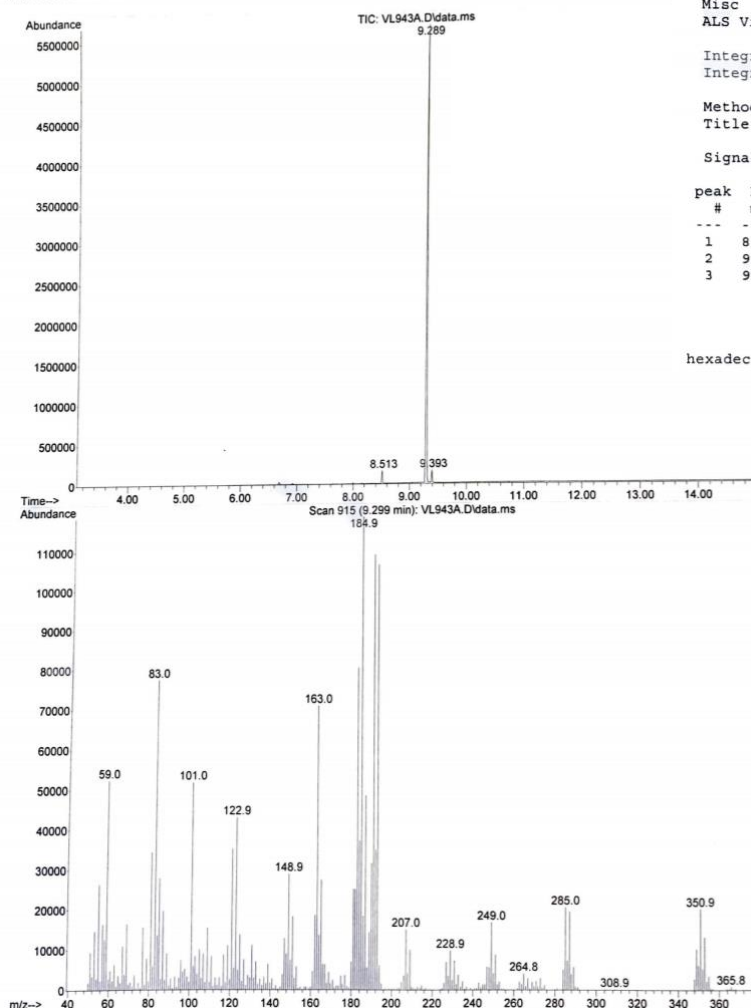

Data CI-210720-VL943A CONC

Sample Name:

Description:

Ionization Mode:CI+

History: Determine m/z[Peak Detect(Centroid,30,Area),Smooth(5)];Correct Base[];Average(MS[1] 10.08..10.09)

Charge number:1

Tolerance:50.00(ppm)

Element:<sup>12</sup>C:0..50, <sup>1</sup>H:0..100, <sup>10</sup>B:1..1, <sup>81</sup>Br:1..1, <sup>35</sup>Cl:3..3, <sup>14</sup>N:0..0, <sup>16</sup>O:2..2

Acquired:7/21/2020 11:08:39 AM

Operator:AccuTof

Mass Calibration data:CAL-291118-CAL-EI-class4

Created:7/21/2020 11:47:29 AM

Created by:AccuTof

Unsaturation Number:-1000.0..2000.0 (Fraction:Both)

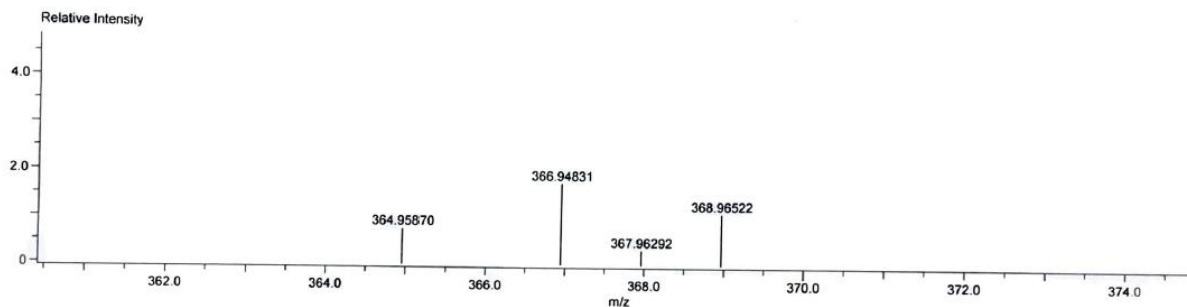

| Mass      | Intensity | Calc. Mass | Mass Difference (ppm) | Possible Formula                                                                                                                                                                 | Unsaturation Number |
|-----------|-----------|------------|-----------------------|----------------------------------------------------------------------------------------------------------------------------------------------------------------------------------|---------------------|
| 364.95870 | 351.33    | 364.95864  | 0.15                  | <sup>12</sup> C <sub>10</sub> <sup>1</sup> H <sub>17</sub> <sup>10</sup> B <sub>1</sub> <sup>81</sup> Br <sub>1</sub> <sup>35</sup> Cl <sub>3</sub> <sup>16</sup> O <sub>2</sub> | 1.0                 |



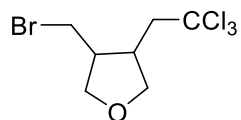

Chemical Formula: C<sub>7</sub>H<sub>10</sub>BrCl<sub>3</sub>O

Molecular Weight: 296,41

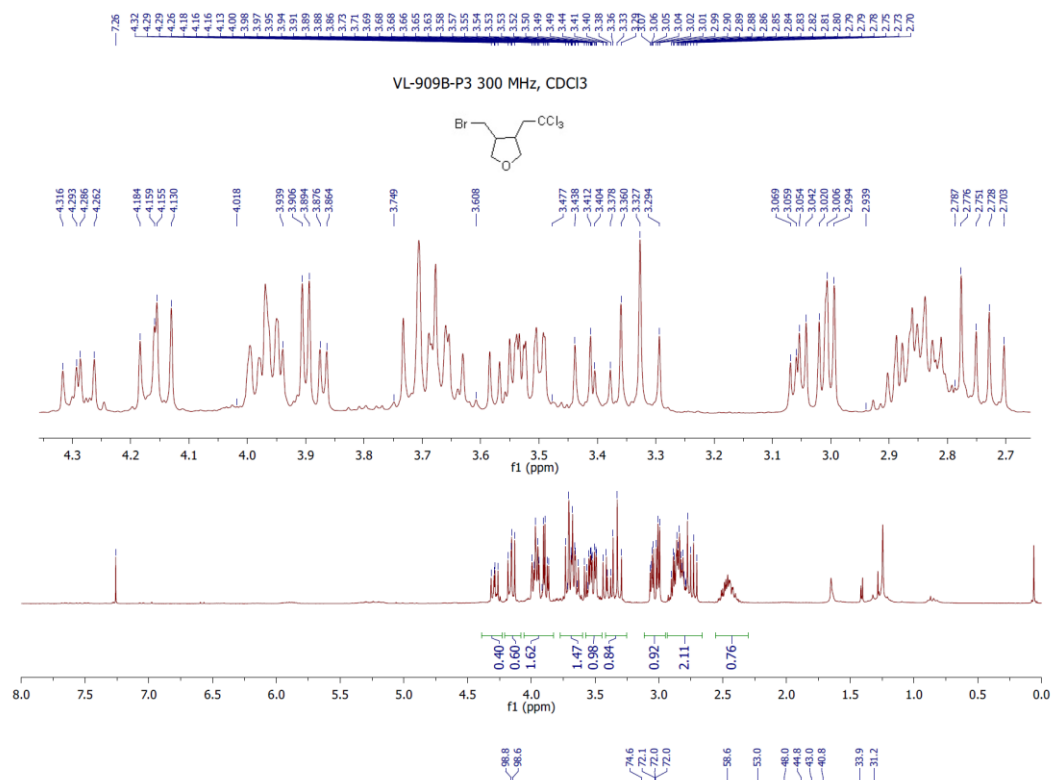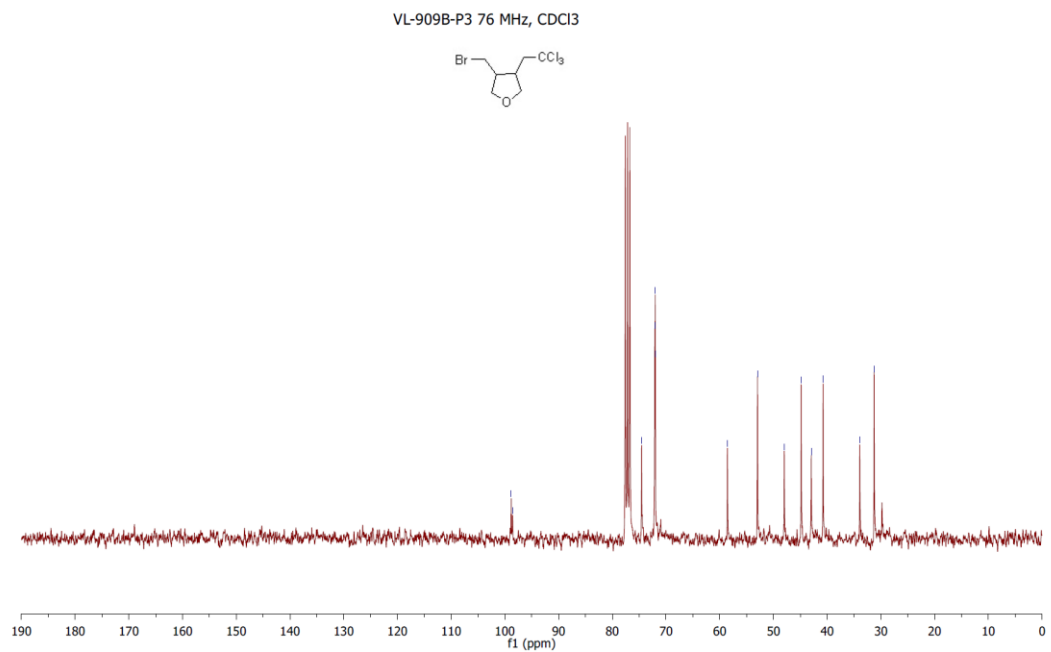

File :D:\DataMS\2017\07-2017\20-07-2017\VL909B-P3.D  
 Operator : VL  
 Acquired : 20 Jul 2017 22:24 using AcqMethod NORMAL.M  
 Instrument : 7890 5975  
 Sample Name: VL909B-P3  
 Misc Info :  
 Vial Number: 26

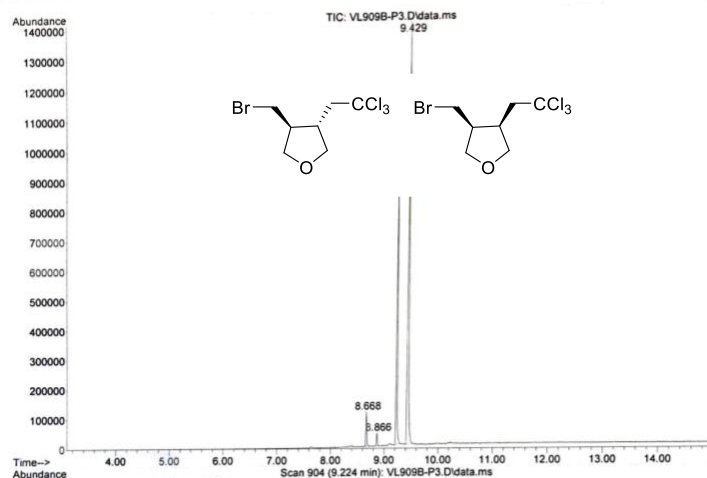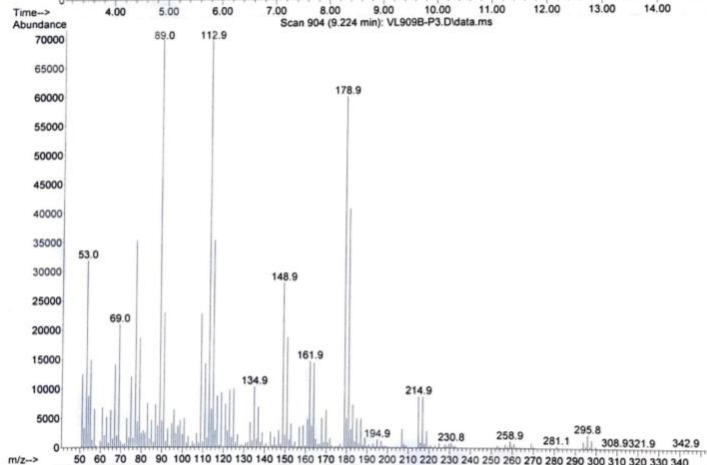

# Area Percent Report

Data Path : D:\DataMS\2017\07-2017\20-07-2017\  
 Data File : VL909B-P3.D  
 Acq On : 20 Jul 2017 22:24  
 Operator : VL  
 Sample : VL909B-P3  
 Misc :  
 ALS Vial : 26 Sample Multiplier: 1

Integration Parameters: autoint1.e  
 Integrator: ChemStation

Method : C:\msdchem\1\methods\DBWAXconfig\hexadecenal.M  
 Title :

Signal : TIC: VL909B-P3.D\data.ms

| peak<br># | R.T.<br>min | first<br>scan | max<br>scan | last<br>scan | PK<br>TY | peak<br>height | corr.<br>area | corr.<br>% max. | % of<br>total |
|-----------|-------------|---------------|-------------|--------------|----------|----------------|---------------|-----------------|---------------|
| 1         | 8.668       | 819           | 822         | 829          | M        | 115902         | 1257455       | 6.28%           | 3.831%        |
| 2         | 8.866       | 848           | 851         | 855          | M2       | 45511          | 500668        | 2.50%           | 1.525%        |
| 3         | 9.225       | 900           | 904         | 914          | M        | 949932         | 11038741      | 55.13%          | 33.633%       |
| 4         | 9.429       | 930           | 934         | 949          | M        | 1420660        | 20024082      | 100.00%         | 61.010%       |

Sum of corrected areas: 32820946

hexadecenal.M Mon Oct 12 17:09:04 2020

File :D:\DataMS\2017\07-2017\20-07-2017\VL909B-P3.D  
Operator : VL  
Acquired : 20 Jul 2017 22:24 using AcqMethod NORMAL.M  
Instrument : 7890 5975  
Sample Name: VL909B-P3  
Misc Info :  
Vial Number: 26

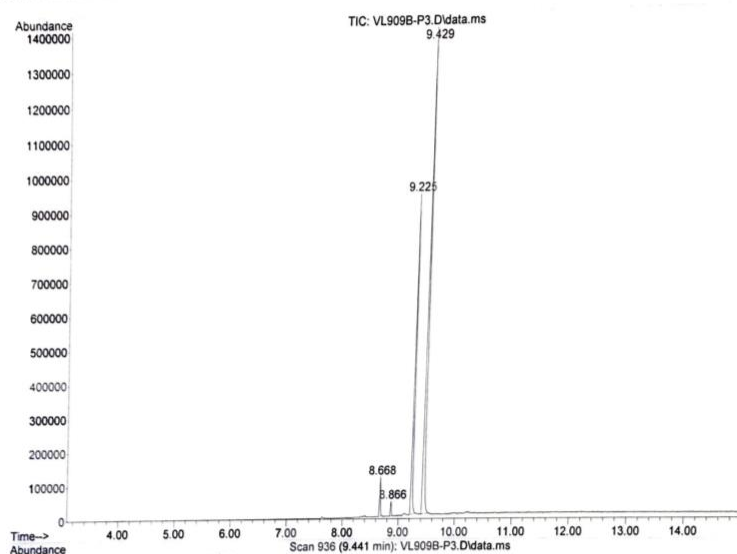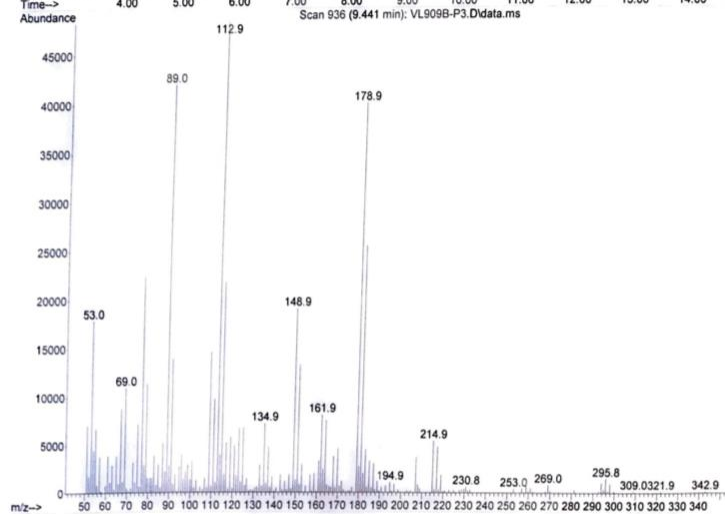

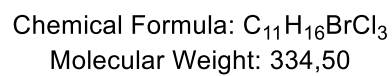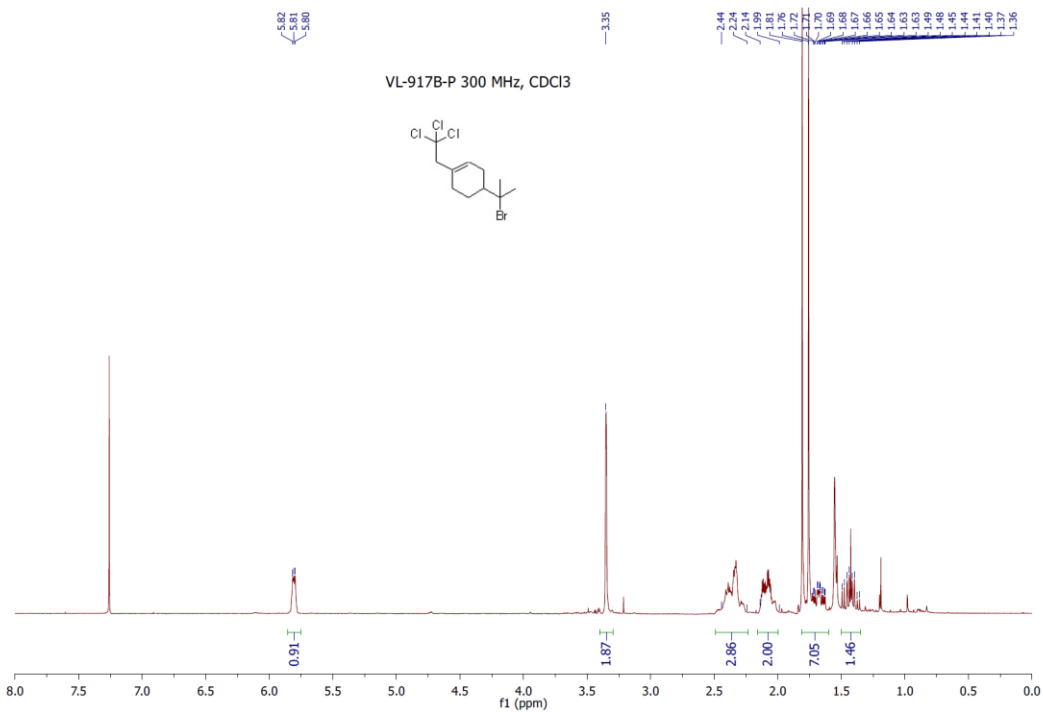

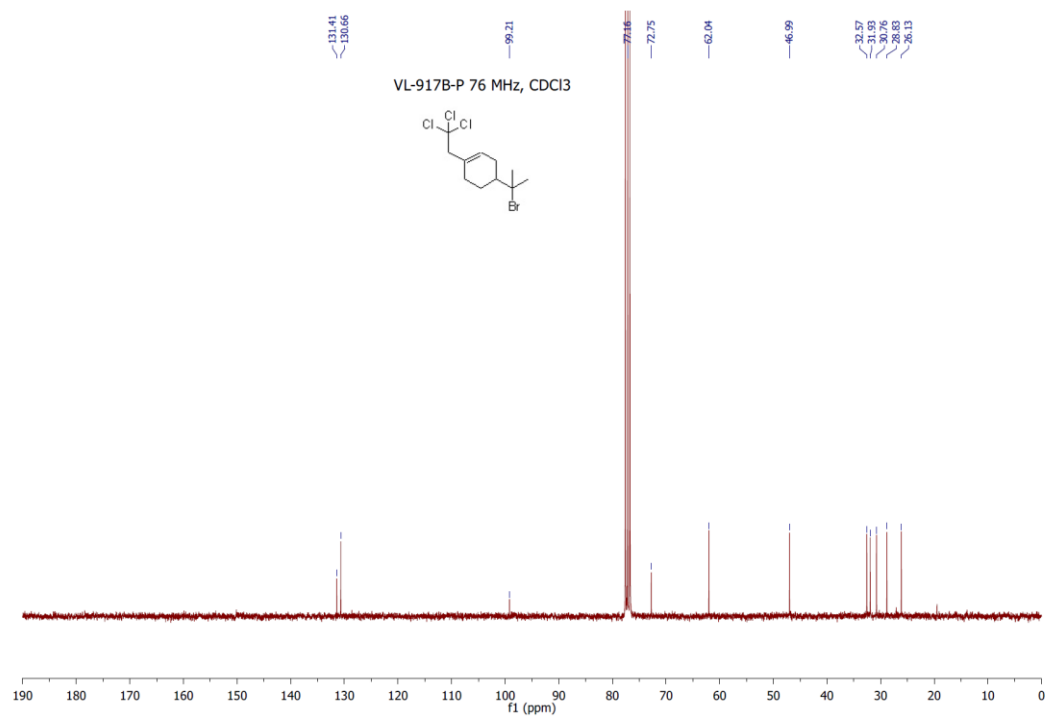

## Area Percent Report

File :D:\DataMS\2017\07-2017\20-07-2017\VL917B-P.D  
Operator : VL  
Acquired : 20 Jul 2017 21:47 using AcqMethod NORMAL.M  
Instrument : 7890 5975  
Sample Name: VL917B-P  
Misc Info :  
Vial Number: 24

Data Path : D:\DataMS\2017\07-2017\20-07-2017\  
Data File : VL917B-P.D  
Acq On : 20 Jul 2017 21:47  
Operator : VL  
Sample : VL917B-P  
Misc :  
ALS Vial : 24 Sample Multiplier: 1

Integration Parameters: autoint1.e  
Integrator: ChemStation

Method : C:\msdchem\1\methods\DBWAXconfig\hexadecenal.M  
Title :

Signal : TIC: VL917B-P.D\data.ms

| peak<br># | R.T.<br>min | first<br>scan | max<br>scan | last<br>scan | PK<br>TY | peak<br>height | corr.<br>area | corr.<br>% max. | % of<br>total |
|-----------|-------------|---------------|-------------|--------------|----------|----------------|---------------|-----------------|---------------|
| 1         | 8.328       | 767           | 772         | 795          | M        | 876441         | 12589634      | 100.00%         | 87.307%       |
| 2         | 8.655       | 816           | 820         | 834          | M        | 123438         | 1830285       | 14.54%          | 12.693%       |

Sum of corrected areas: 14419919

hexadecenal.M Mon Oct 12 17:07:37 2020

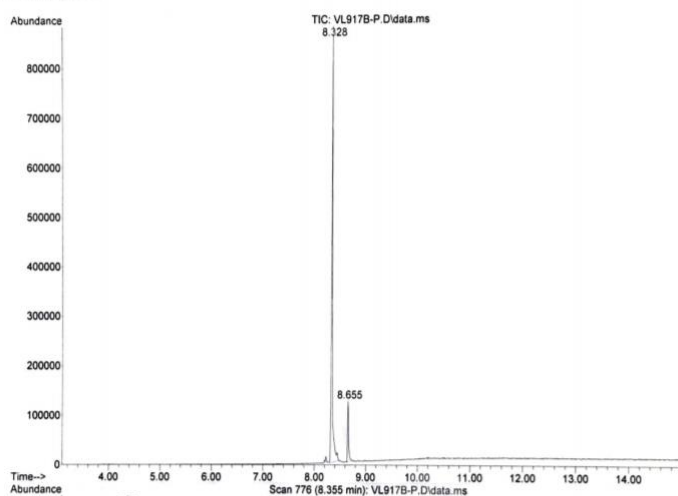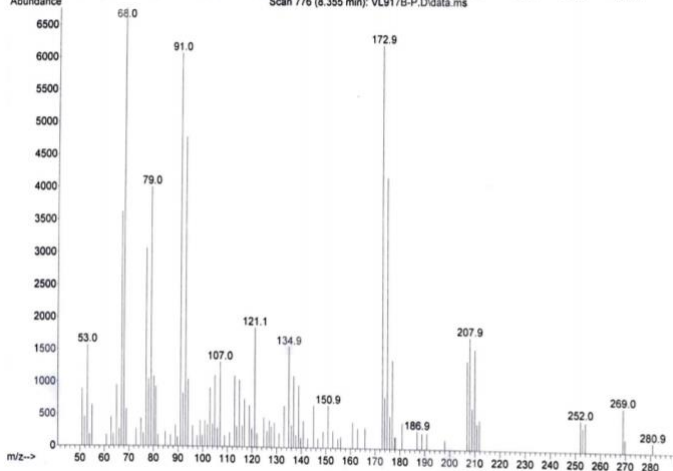

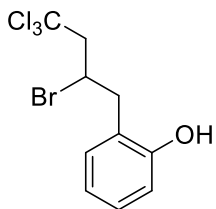

Chemical Formula:  $\text{C}_{10}\text{H}_{10}\text{BrCl}_3\text{O}$

Molecular Weight: 332,44

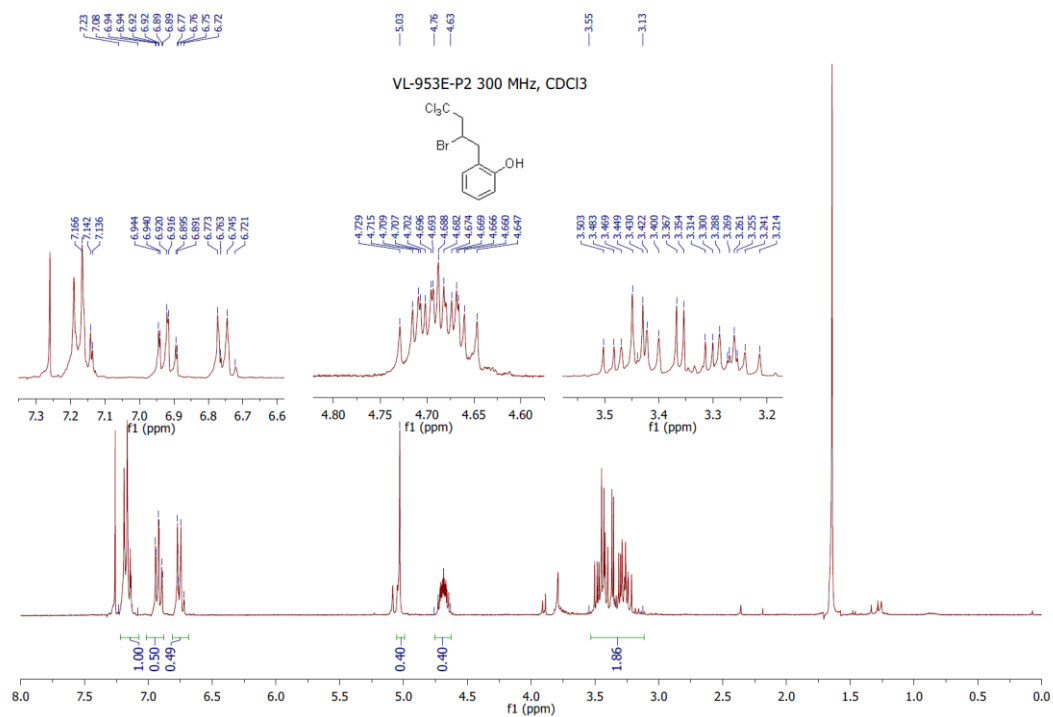

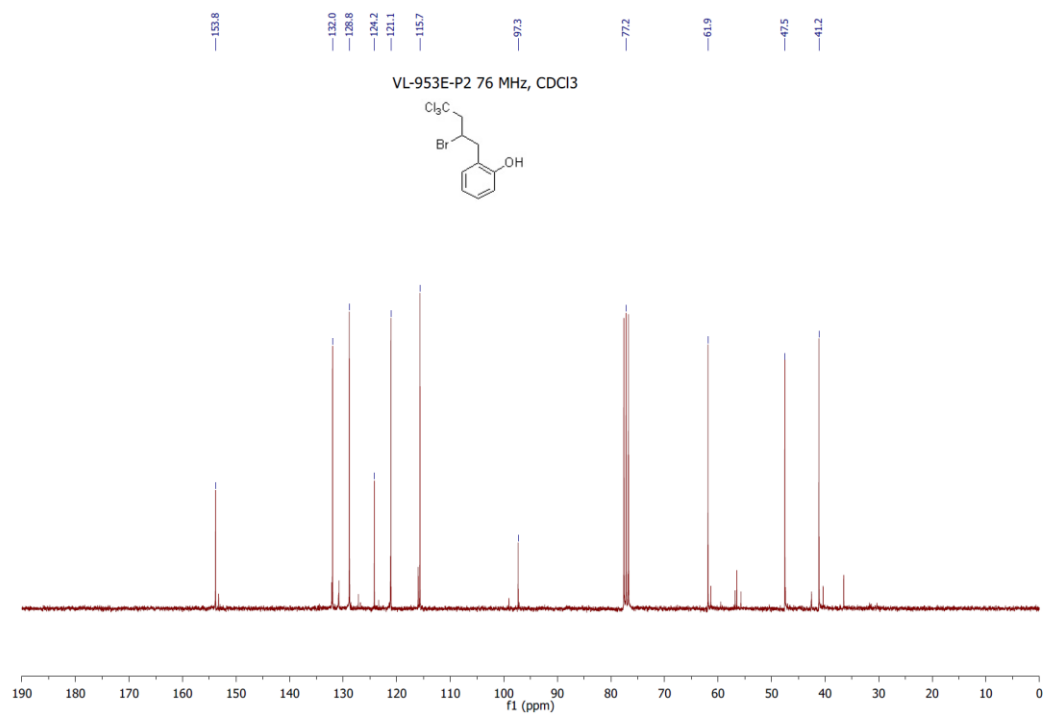



File :D:\DataMS\2017\08-2017\25082017\VL953EP2.D  
 Operator : VL  
 Acquired : 25 Aug 2017 15:49 using AcqMethod NORMAL.M  
 Instrument : 7890 5975  
 Sample Name : VL953EP2  
 Misc Info :  
 Vial Number : 16

# Area Percent Report

Data Path : D:\DataMS\2017\08-2017\25082017\  
 Data File : VL953EP2.D  
 Acq On : 25 Aug 2017 15:49  
 Operator : VL  
 Sample : VL953EP2  
 Misc :  
 ALS Vial : 16 Sample Multiplier: 1

Integration Parameters: autoint1.e  
 Integrator: ChemStation

Method : C:\msdchem\1\methods\DBWAXconfig\hexadecenal.M  
 Title :

Signal : TIC: VL953EP2.D\data.ms

| peak # | R.T. min | first scan | max scan | last scan | PK TY | peak height | corr. area | corr. % max. | % of total |
|--------|----------|------------|----------|-----------|-------|-------------|------------|--------------|------------|
| 1      | 8.391    | 777        | 781      | 794       | M     | 112674      | 2140071    | 17.53%       | 13.776%    |
| 2      | 9.114    | 884        | 888      | 898       | M     | 832556      | 12207185   | 100.00%      | 78.578%    |
| 3      | 9.203    | 898        | 901      | 911       | M2    | 80908       | 1187935    | 9.73%        | 7.647%     |

Sum of corrected areas: 15535191

hexadecenal.M Mon Oct 12 17:22:37 2020

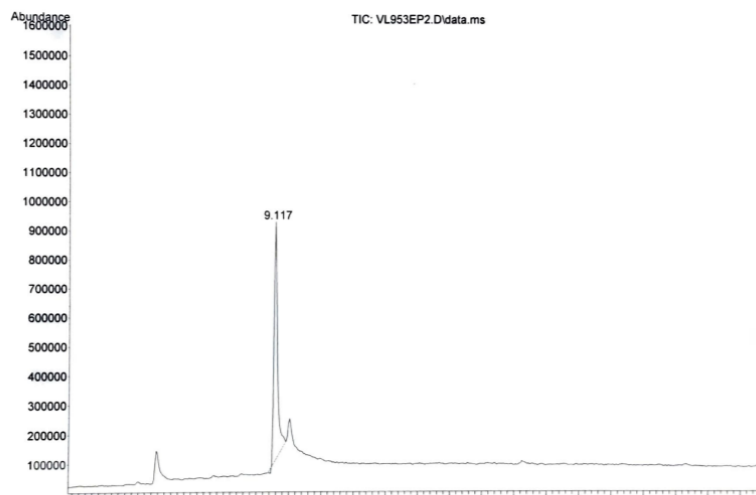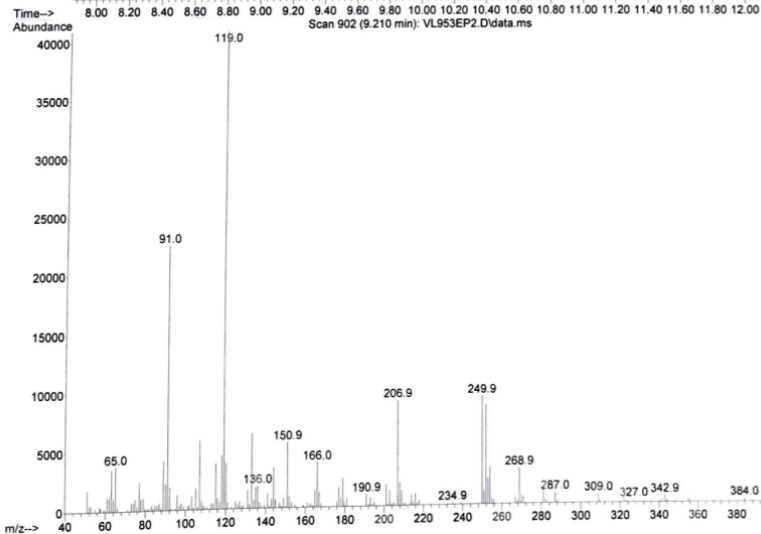

Data: EI-280220-VL953EP  
 Sample Name:  
 Description:  
 Ionization Mode: EI+  
 History: Determine m/z [Peak Detect [Centroid, 30, Area], Smooth [7]], Correct Base [], Average [MS [1] 12.37..12.47]

Charge number: 1  
 Element:  $^{12}\text{C}$ : 0.. 50,  $^1\text{H}$ : 0.. 100,  $^{79}\text{Br}$ : 1.. 1,  $^{35}\text{Cl}$ : 3.. 3,  $^{16}\text{O}$ : 0.. 1

Acquired: 2/28/2020 3:28:40 PM  
 Operator: AccuTof  
 Mass Calibration data: CAL-291118-CAL-EI-class4  
 Created: 2/28/2020 4:21:19 PM  
 Created by: AccuTof

Unsaturation Number: -1.5.. 20.0 (Fraction: Both)

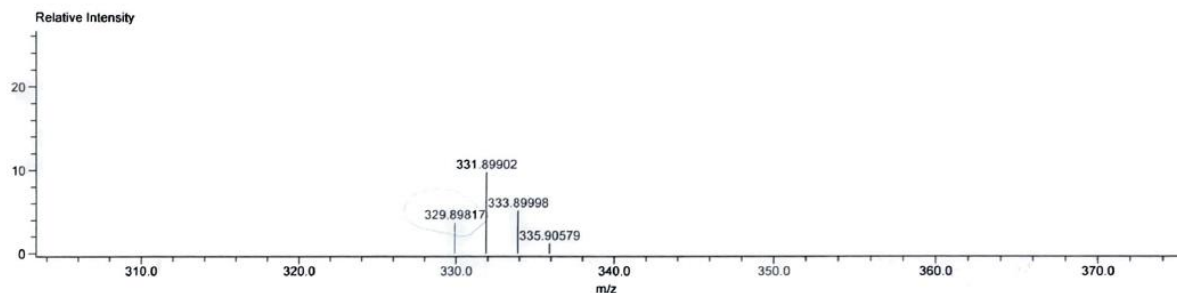

| Mass      | Intensity | Calc. Mass | Mass Difference (ppm) | Possible Formula                                                                   | Unsaturation Number |
|-----------|-----------|------------|-----------------------|------------------------------------------------------------------------------------|---------------------|
| 329.89817 | 816.08    | 329.89806  | 0.32                  | $^{12}\text{C}_{10}^1\text{H}_{10}^{79}\text{Br}_1^{35}\text{Cl}_3^{16}\text{O}_1$ | 4.0                 |
